# Supplementary material for: Cross-conjugated vinylogous annulation of π-CF3-allyl Pd-complexes with 4-methyl-3-trifluoroacetyl-quinolones
Source: Royal Society of Chemistry journal article supplement (doi:10.1039/d4cc03953j), 2024-01-01

## Electronic Supplementary Information

### **Cross-conjugated vinylogous annulation of $\pi$ -CF<sub>3</sub>-allyl Pd-complexes with 4-methyl-3-trifluoroacetyl-quinolones**

Chiliveru Priyanka,<sup>a,b</sup> Desagoni Madhu,<sup>a,b</sup> Palivela Siva Gangadhar,<sup>b,c</sup> Lingamallu Giribabu,<sup>b,c</sup> and Nagender Punna<sup>\*,a,b</sup>

<sup>a</sup>Department of Fluoro & Agro chemicals CSIR-Indian Institute of Chemical Technology, Hyderabad - 500007, India.

<sup>b</sup>Academy of Scientific and Innovative Research (AcSIR), Ghaziabad 201002. Polymers and

<sup>c</sup>Functional Materials Division, CSIR-Indian Institute of Chemical Technology, Hyderabad, 500007, Telangana, India.

**Email:** [nagenderpunna@iict.res.in](mailto:nagenderpunna@iict.res.in)

| entry | Table of Contents                                                                                                           | Page No. |
|-------|-----------------------------------------------------------------------------------------------------------------------------|----------|
| 1     | General information                                                                                                         | S2       |
| 2     | Methods and Instrumentation                                                                                                 | S2       |
| 3     | Optimization of the reaction conditions                                                                                     | S3       |
| 4     | Figure S1: Emission spectra of phenanthridone derivatives <b>4</b> in DCM solvent by exciting at ~345 nm                    | S6       |
| 5.    | Figure S2: Fluorescence decay curves of investigated compounds in dichloromethane solvent.                                  | S6       |
| 6     | Table S3. Optical and emission properties of phenanthridone derivatives <b>4</b> .                                          | S7       |
| 7     | Figure S3: Isodensity (0.02) plots of FMOs using the B3LYP method 6-31G(d,p) & molecular electrostatic potential maps (ESP) | S7       |
| 8     | Figure S4: Cyclic voltammogrammes of investigated compounds in dichloromethane solvent using 0.1 M TBAP                     | S8       |
| 9     | Experimental procedures and characterization data of compounds                                                              | S8       |
| 10    | Gram scale reaction of <b>3a</b> & <b>4a</b>                                                                                | S30      |
| 11    | X-ray analysis data of <b>3a</b>                                                                                            | S31      |
| 12    | References                                                                                                                  | S32      |
| 13    | <sup>1</sup> H NMR and <sup>13</sup> C NMR and <sup>19</sup> F spectral copies of compounds                                 | S34      |

## 1. General information:

All the reactions were performed in an oven-dried glass apparatus, the air and moisture-sensitive reactions were carried out under an inert atmosphere (nitrogen) using freshly distilled anhydrous solvents. Commercially available reagents were used as such without further purification. All reactions were monitored by thin-layer chromatography on silica plates using UV-light and anisaldehyde for visualization. Column chromatography was performed on silica gel (100-200 mesh) using hexanes and ethyl acetate as eluent.  $^1\text{H}$  NMR was recorded in  $\text{CDCl}_3$  on 500 MHz and 400 MHz,  $^{13}\text{C}$  NMR was recorded on 125 MHz, 100 MHz and 75 MHz and  $^{19}\text{F}$  NMR was recorded on 377 MHz. Chemical shifts were reported in  $\delta$  (ppm) relative to TMS as an internal standard and  $J$  values were given in Hz (hertz). Multiplicity is indicated as, s (singlet); d (doublet); t (triplet); m (multiplet); dd (doublet of doublets), etc.  $\delta$  7.26 and  $\delta$  1.56 are corresponding to  $\text{CDCl}_3$  and moisture respectively in  $^1\text{H}$  NMR,  $\delta$  77.16 is related to  $\text{CDCl}_3$  in  $^{13}\text{C}$  NMR. FT-IR spectra were recorded on Alpha (Bruker) Infrared Spectrophotometer. High resolution mass spectra (HRMS) [ $\text{ESI}^+$ ] were obtained using a TOF or a double-focusing spectrometer.

## 2. Methods and Instrumentation

Both differential pulse and cyclic voltammetric measurements were performed by using CHI instruments model CHI 620C potentiostat as detailed in our previous reports. UV-visible spectra were recorded with a Shimadzu spectrophotometer (Model UV-3600). Concentration of the samples used for these measurements ranged from about  $5 \times 10^{-5}$  M. Steady-state fluorescence spectra were measured by using Fluorolog-3 spectrofluorometer (Fluoro Log3 model, JobinYvon) as detailed in our previous reports. Fluorescence lifetime measurements were carried on a picosecond time-correlated single photon counting (TCSPC) setup (Fluoro Log3-Triple Illuminator, IBH Horiba JobinYvon) employing a picosecond light emitting diode laser (NanoLED,  $\lambda_{\text{ex}} = 370$  nm) as the excitation source.

We have adopted Gaussian 09 quantum chemical software on personal computer for full geometry optimization of all sensitizers. For further calculations we have used B3LYP hybrid functional and 6-31 G (d,p) basis set as input. Ground state properties such as optimized energy structures, frontier molecular orbitals (FMO) were performed by Density Functional Theory (DFT) in the gas phase. Time Dependent Density Functional Theory (TD-DFT) were used for calculating the excited state properties like percentage of molecular contribution, oscillatory strength, singlet transition energy in the tetrahydrofuran solvent.<sup>1-4</sup>

### 3. Table S1: Optimization of the reaction conditions.<sup>a</sup>

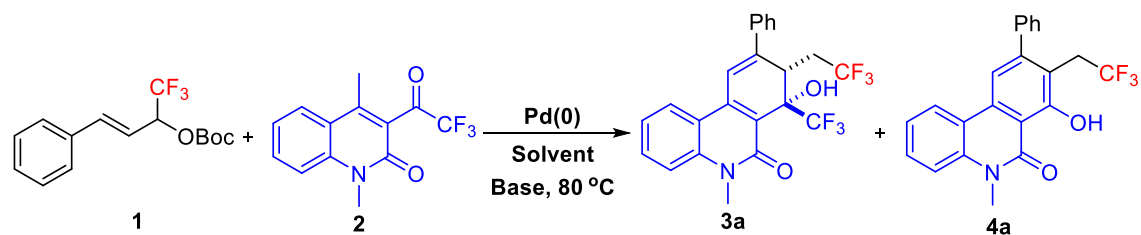

| Entry           | Pd-Source                                                             | Base                                | Solvent                 | 3a/4a (%)    | dr of 3a         |
|-----------------|-----------------------------------------------------------------------|-------------------------------------|-------------------------|--------------|------------------|
| 1               | PdCl <sub>2</sub>                                                     | Cs <sub>2</sub> CO <sub>3</sub>     | CH <sub>3</sub> CN      | 55/4         | > 20:1           |
| 2               | Pd(OAc) <sub>2</sub>                                                  | Cs <sub>2</sub> CO <sub>3</sub>     | CH <sub>3</sub> CN      | 50/8         | > 20:1           |
| <b>3</b>        | <b>Pd(PPh<sub>3</sub>)<sub>4</sub></b>                                | <b>Cs<sub>2</sub>CO<sub>3</sub></b> | <b>CH<sub>3</sub>CN</b> | <b>83/10</b> | <b>&gt; 20:1</b> |
| 4               | Pd <sub>2</sub> (dba) <sub>3</sub> .CHCl <sub>3</sub> /L <sub>1</sub> | Cs <sub>2</sub> CO <sub>3</sub>     | CH <sub>3</sub> CN      | 29/3         | > 20:1           |
| 5               | Pd <sub>2</sub> (dba) <sub>3</sub> .CHCl <sub>3</sub> /L <sub>2</sub> | Cs <sub>2</sub> CO <sub>3</sub>     | CH <sub>3</sub> CN      | 44/6         | > 20:1           |
| 6               | Pd <sub>2</sub> (dba) <sub>3</sub> .CHCl <sub>3</sub> /L <sub>3</sub> | Cs <sub>2</sub> CO <sub>3</sub>     | CH <sub>3</sub> CN      | 18/0         | > 20:1           |
| 7               | Pd <sub>2</sub> (dba) <sub>3</sub> .CHCl <sub>3</sub> /L <sub>4</sub> | Cs <sub>2</sub> CO <sub>3</sub>     | CH <sub>3</sub> CN      | 33/5         | > 20:1           |
| 8               | Pd(PPh <sub>3</sub> ) <sub>4</sub>                                    | DBU                                 | CH <sub>3</sub> CN      | -            | -                |
| 9               | Pd(PPh <sub>3</sub> ) <sub>4</sub>                                    | K <sub>2</sub> CO <sub>3</sub>      | CH <sub>3</sub> CN      | 43/0         | > 20:1           |
| 10              | Pd(PPh <sub>3</sub> ) <sub>4</sub>                                    | NaOEt                               | CH <sub>3</sub> CN      | 11/0         | > 20:1           |
| 11              | Pd(PPh <sub>3</sub> ) <sub>4</sub>                                    | Cs <sub>2</sub> CO <sub>3</sub>     | DCE                     | 31/0         | > 20:1           |
| 12              | Pd(PPh <sub>3</sub> ) <sub>4</sub>                                    | Cs <sub>2</sub> CO <sub>3</sub>     | PEG-400                 | -            | -                |
| 13              | Pd(PPh <sub>3</sub> ) <sub>4</sub>                                    | Cs <sub>2</sub> CO <sub>3</sub>     | THF                     | 15/0         | > 20:1           |
| <b>14</b>       | <b>Pd(PPh<sub>3</sub>)<sub>4</sub></b>                                | <b>Cs<sub>2</sub>CO<sub>3</sub></b> | <b>DMF</b>              | <b>9/82</b>  | <b>&gt; 20:1</b> |
| 15              | Pd(PPh <sub>3</sub> ) <sub>4</sub>                                    | Cs <sub>2</sub> CO <sub>3</sub>     | Toulene                 | -            | -                |
| 16 <sup>b</sup> | Pd(PPh <sub>3</sub> ) <sub>4</sub>                                    | Cs <sub>2</sub> CO <sub>3</sub>     | CH <sub>3</sub> CN      | 24/0         | > 20:1           |
| 17 <sup>c</sup> | Pd(PPh <sub>3</sub> ) <sub>4</sub>                                    | Cs <sub>2</sub> CO <sub>3</sub>     | CH <sub>3</sub> CN      | -            | -                |

<sup>a</sup>Experiments were carried out using **1a** (0.24 mmol), **2a** (0.2 mmol), base (2 equiv) and the Pd source (5 mol %) and the ligand (10 mol%) in 1.0 mL of solvent at 80 °C. isolated yields. <sup>b</sup>Reaction at 40 °C. <sup>c</sup>Reaction at RT

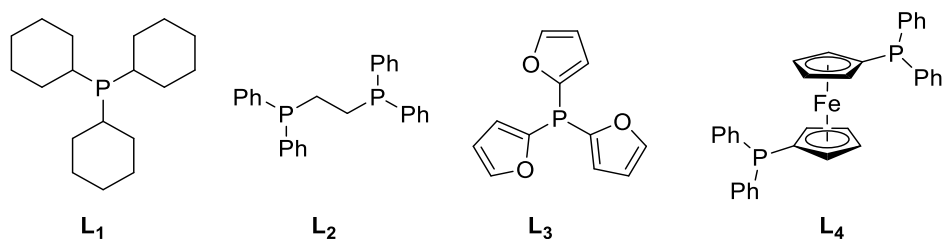

### 3.1 Table S2: Study of solvent effect:

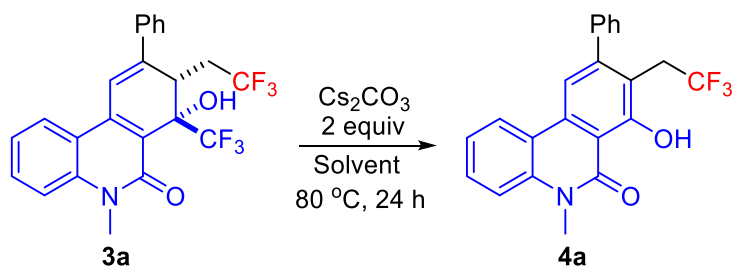

| S.No | Solvent            | Yield of compound 4a (%) |
|------|--------------------|--------------------------|
| 1    | CH <sub>3</sub> CN | 21                       |
| 2*   | DMF                | 95                       |
| 3    | THF                | 47                       |

\* Reaction completed in 4 h

To know the solvent effect in the conversion of compound **3a** to compound **4a**, several reactions have been attempted in different solvents in the presence of 2 equiv Cs<sub>2</sub>CO<sub>3</sub>. Here, the reaction in the presence of acetonitrile furnishes desired aromatized product **4** in 21% yield, whereas DMF is giving excellent yield (95%). Next, the reaction in the THF solvent afforded the corresponding product in 47% yield. All these results indicate that the slightly acidic nature of acetonitrile is the reason for low conversion to get the desired product and previous literature supports that the trifluoromethyl group could be eliminated easily in DMF solvent.<sup>5,6</sup>

Starting materials CF<sub>3</sub>-allylcarbonates and 1,4-dimethyl-3-(2,2,2-trifluoroacetyl)quinolin-2(1*H*)-ones were reported in previous articles:<sup>7,8,9,10</sup>

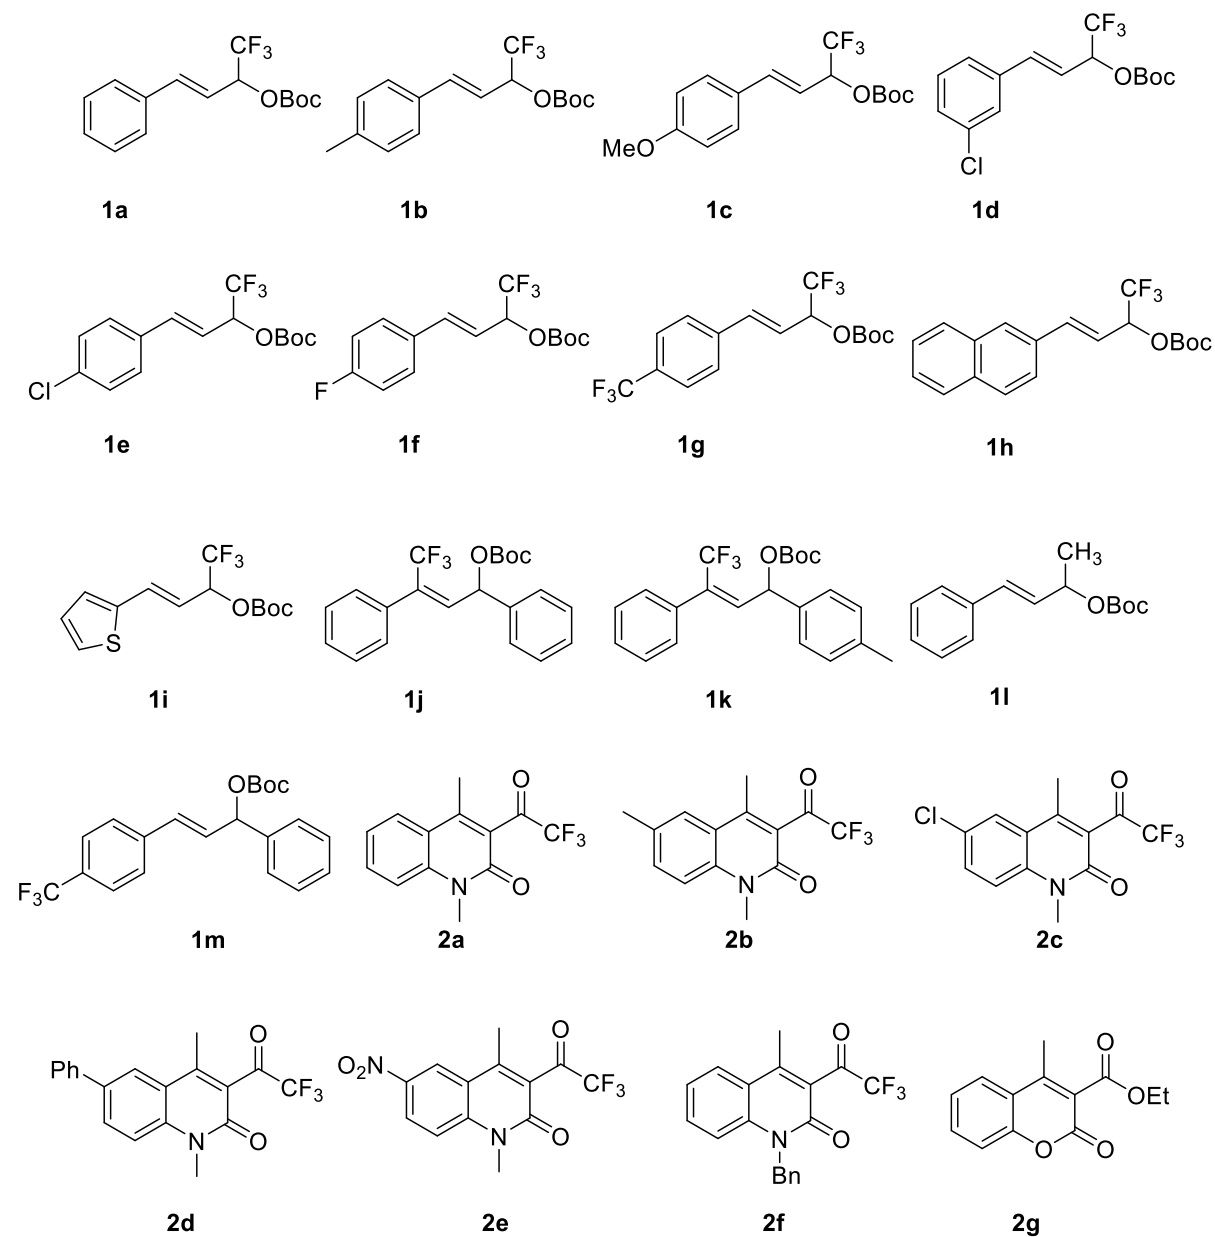

4. **Figure S1:** Fluorescence decay curves of investigated compounds in dichloromethane solvent.

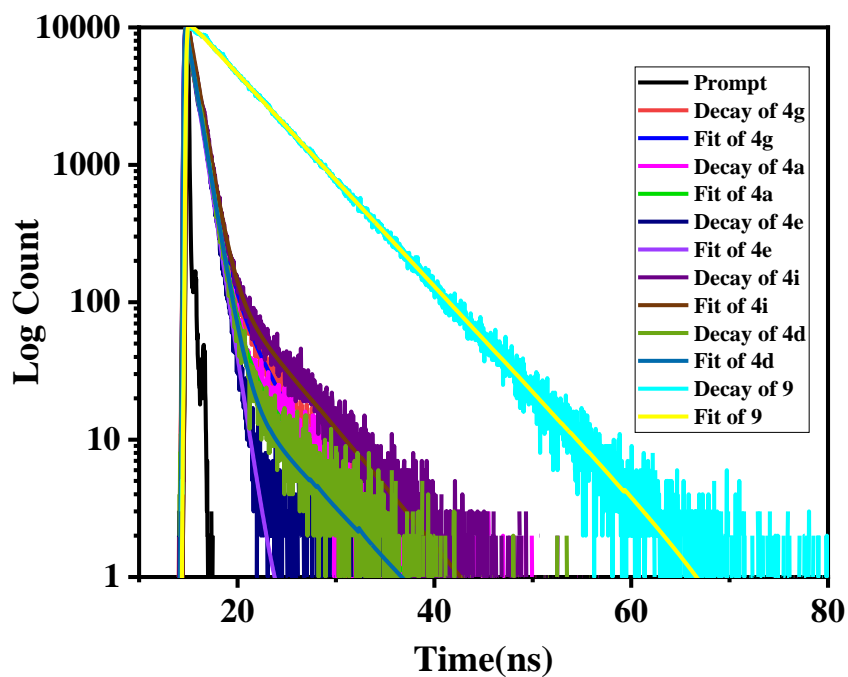

5. **Figure S2:** Fluorescence decay curves of investigated compounds in dichloromethane solvent.

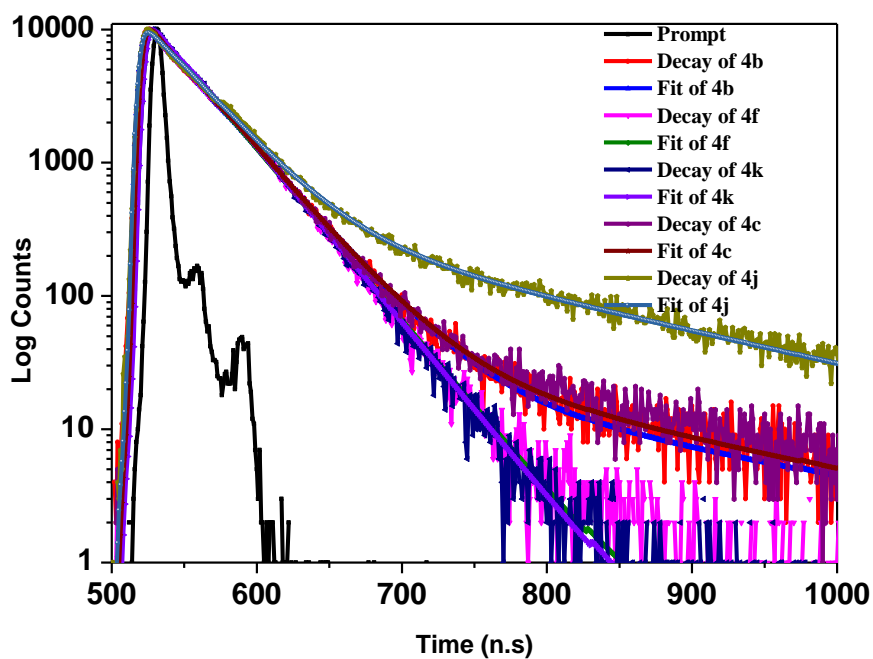

**6. Table S3.** Optical and emission properties of phenanthridone derivatives **4**.

| Entry     | $\lambda_{\text{max}}$ nm<br>( $\log \epsilon$ , $\text{M}^{-1}\text{cm}^{-1}$ ) <sup>a</sup> | $\lambda_{\text{max}}$ nm<br>(emission) <sup>b</sup> | $\tau$ , ns <sup>c</sup> | Quantum<br>Yield <sup>d</sup> |
|-----------|-----------------------------------------------------------------------------------------------|------------------------------------------------------|--------------------------|-------------------------------|
| <b>4a</b> | 344 (4.10)                                                                                    | 405                                                  | 0.92 (95.88)             | 0.52                          |
|           | 361 (4.11)                                                                                    | 462                                                  | 4.68 (4.12)              |                               |
|           | 345 (4.31)                                                                                    | 405                                                  | 0.15 (3.52)              |                               |
| <b>4b</b> | 361 (4.32)                                                                                    | 405                                                  | 0.97 (94.40)             | 0.62                          |
|           |                                                                                               | 462                                                  | 5.84 (2.08)              |                               |
|           | 344 (4.12)                                                                                    | 406                                                  | 0.14 (3.70)              |                               |
| <b>4c</b> | 361 (4.09)                                                                                    | 460                                                  | 0.95 (93.61)             | 0.60                          |
|           |                                                                                               |                                                      | 5.32 (2.69)              |                               |
|           |                                                                                               |                                                      | 0.15 (3.52)              |                               |
| <b>4d</b> | 361 (4.80)                                                                                    | 463                                                  | 0.97 (94.41)             | 0.63                          |
|           |                                                                                               |                                                      | 5.84 (2.08)              |                               |
|           | 345 (4.22)                                                                                    | 405                                                  | 0.93 (100)               |                               |
| <b>4e</b> | 361 (4.24)                                                                                    | 463                                                  |                          | 0.57                          |
|           |                                                                                               |                                                      |                          |                               |
|           | 344 (4.38)                                                                                    | 404                                                  | 0.94 (100)               |                               |
| <b>4f</b> | 361 (4.39)                                                                                    | 463                                                  |                          | 0.63                          |
|           |                                                                                               |                                                      |                          |                               |
|           | 349 (4.20)                                                                                    | 404                                                  | 0.93 (89.90)             |                               |
| <b>4g</b> | 365 (4.22)                                                                                    | 465                                                  | 3.34 (10.10)             | 0.46                          |
|           |                                                                                               |                                                      |                          |                               |
|           | 340 (4.07)                                                                                    | 405                                                  | 0.11 (3.20)              |                               |
| <b>4h</b> | 354 (4.11)                                                                                    | 432                                                  | 0.92 (96.80)             | 0.40                          |
|           |                                                                                               |                                                      |                          |                               |
|           | 349 (4.27)                                                                                    | 405                                                  | 0.94 (91.06)             |                               |
| <b>4i</b> | 366 (4.30)                                                                                    | 465                                                  | 5.18 (8.94)              | 0.59                          |
|           |                                                                                               |                                                      |                          |                               |
|           | 349 (4.43)                                                                                    | 404                                                  | 0.93 (83.22)             |                               |
| <b>4j</b> | 365 (4.44)                                                                                    | 460                                                  | 4.97 (16.78)             | 0.74                          |
|           |                                                                                               |                                                      |                          |                               |

<sup>a</sup>Solvent: DCM, Error limits:  $\lambda_{\text{max}}$ ,  $\pm 1$  nm,  $\epsilon \pm 10\%$ . <sup>b</sup>Error limits:  $\lambda_{\text{em}}$ ,  $\pm 1$  nm. <sup>c</sup>Error limits  $\tau$   $\sim 10\%$ . <sup>d</sup> $\phi$ ,  $\pm 0.01\%$ .

**7. Figure S3:** Isodensity (0.02) plots of FMOs using the B3LYP method 6-31G(d,p), and molecular electrostatic potential maps (ESP).

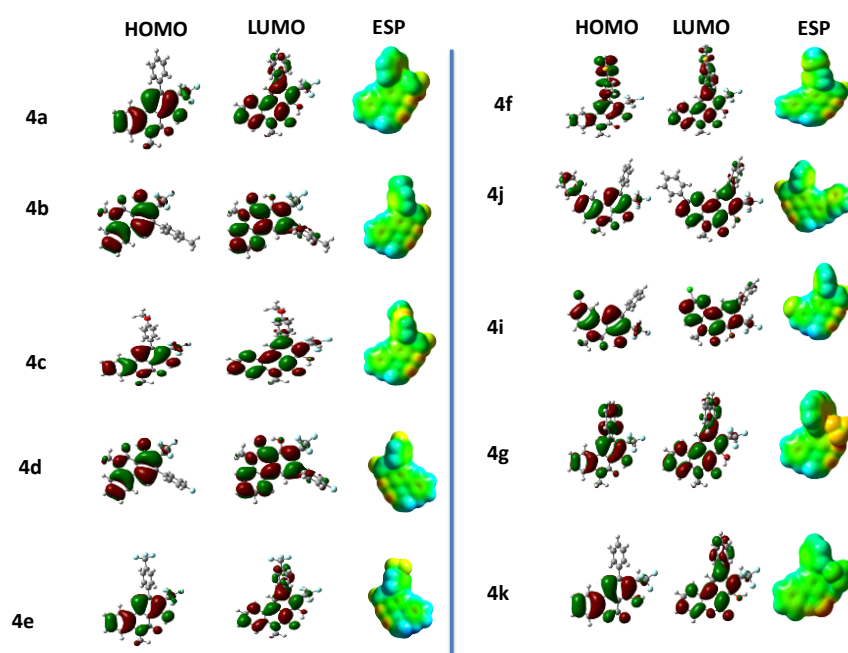

**8. Figure S4:** Cyclic voltammograms of investigated compounds in dichloromethane solvent using 0.1 M TBAP.

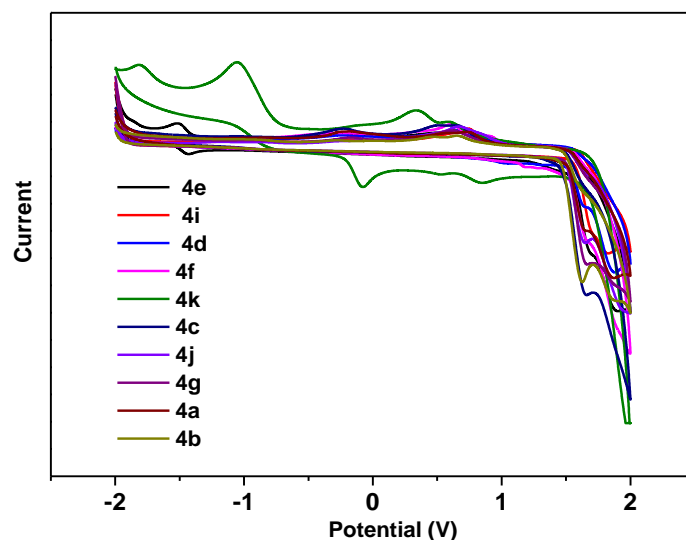

## 9. Experimental procedures and characterization data of compounds:

### 9.1 General procedure for the synthesis of substituted 4-methyl quinolones (method A):

In an oven-dried round bottom flask, 2-amino acetophenones **S1** (10.0 mmol, 1.0 equiv), ethyl 4,4,4-trifluoromethyl-acetoacetate **S2** (13.0 mmol 1.3 equiv), and  $\text{CeCl}_3 \cdot 7\text{H}_2\text{O}$  (40 mol %, 0.4equiv) were taken in toluene (5 mL). The reaction was heated at 120 °C (oil bath temperature) for 24 h, under a nitrogen atmosphere. The progress of the reaction was monitored by TLC. After completion of the reaction, the solvent was removed under reduced pressure, the obtained solid was washed with *n*-hexane, followed by ice-cold water (20 mL), and filtered. The separated solid product was dried and purified by column chromatography using *n*-hexane/ethyl acetate as an eluent to afford 3-(2,2,2-trifluoroacetyl) quinolin-2(1*H*)-ones. The data of compound **S3** were reported in previous literature.<sup>8</sup>

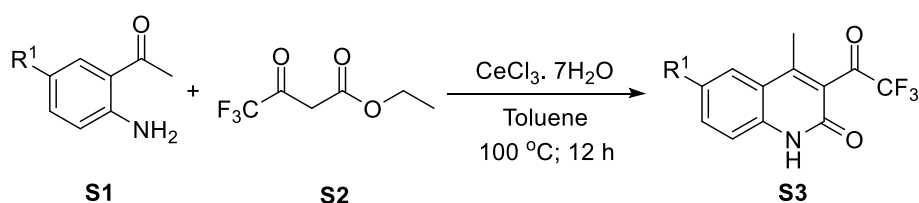

To the stirred solution of compound **S3** (0.40 mmol) in 10 ml DMF was added NaH (60% in mineral oil, 0.48 mmol) portion-wise at 0 °C. To this reaction mixture, alkyl halide (0.60 mmol)



was added dropwise, and then warmed to room temperature. The progress of the reaction was monitored by TLC, after completion of the starting material, the reaction mixture was quenched with saturated  $\text{NH}_4\text{Cl}$  solution and the organic layer was extracted with ethyl acetate, dried over anhydrous  $\text{Na}_2\text{SO}_4$ , and concentrated under reduced pressure. The crude product was further purified by column chromatography (using 8:2 hexane/ethyl acetate solvent system) to afford the pure product **2**.<sup>8</sup>

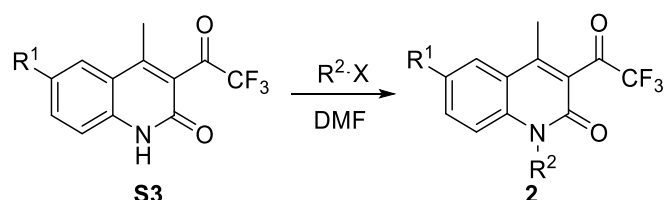

### 6-Chloro-1,4-dimethyl-3-(2,2,2-trifluoroacetyl)quinolin-2(1H)-one (**2c**)

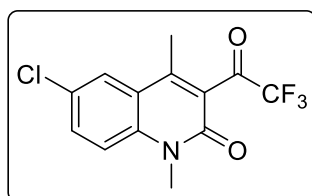

Following the general method (6-chloro-4-methyl-3-(2,2,2-trifluoroacetyl)quinolin-2(1H)-one **S3c** (115.60 mg, 0.40 mmol), NaH (19.20 mg, 0.48 mmol), methyl iodide (85.16 mg, 0.6 mmol) and 3 mL DMF were used. compound **2c** was obtained as a white solid, yield 92% (111.51 mg), mp: 150-152 °C; <sup>1</sup>H NMR (400 MHz,  $\text{CDCl}_3$ )  $\delta$  7.79 (d,  $J = 2.4$  Hz, 1H), 7.63 (dd,  $J = 9.0, 2.4$  Hz, 1H), 7.37 (d,  $J = 9.0$  Hz, 1H), 3.70 (s, 3H), 2.42 (s, 3H); <sup>13</sup>C NMR (101 MHz,  $\text{CDCl}_3$ )  $\delta$  186.4 (q,  $J = 38.6$  Hz), 158.9, 146.7, 138.5, 132.6, 128.8, 127.4, 125.9, 121.4, 116.3, 115.3 (q,  $J = 291.1$  Hz), 29.4, 15.8; <sup>19</sup>F NMR (377 MHz,  $\text{CDCl}_3$ )  $\delta$  -76.27 (s, 3F); HRMS (ESI)  $m/z$   $[\text{M} + \text{H}]^+$  calcd for  $\text{C}_{13}\text{H}_{10}\text{ClF}_3\text{NO}_2$ , 304.0352, found 304.03481.

### 1,4-Dimethyl-6-nitro-3-(2,2,2-trifluoroacetyl)quinolin-2(1H)-one (**2e**)

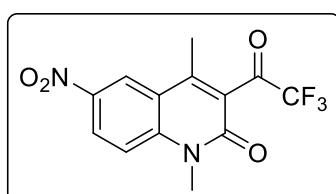

Following the general method (4-methyl-6-nitro-3-(2,2,2-trifluoroacetyl)quinolin-2(1H)-one **S3e** (60 mg, 0.20 mmol), NaH (19.20 gm, 0.48 mmol), methyl iodide (85.16 mg, 0.6 mmol) and 3 mL DMF were used) compound **2e** was obtained as a white solid, yield 82% (51.5 mg),

mp: 136-138 °C;  $^1\text{H NMR}$  (500 MHz,  $\text{CDCl}_3$ )  $\delta$  8.75 (d,  $J = 2.5$  Hz, 1H), 8.53 (dd,  $J = 9.3, 2.5$  Hz, 1H), 7.55 (d,  $J = 9.3$  Hz, 1H), 3.78 (s, 3H), 2.54 (s, 3H);  $^{13}\text{C NMR}$  (101 MHz,  $\text{CDCl}_3$ )  $\delta$  185.7 (q,  $J = 39.1$  Hz), 159.1, 147.5, 143.8, 142.7, 128.2, 127.0, 122.6, 120.1, 115.7, 115.2 (q,  $J = 291.0$  Hz), 29.9, 15.9;  $^{19}\text{F NMR}$  (377 MHz,  $\text{CDCl}_3$ )  $\delta$  -76.25 (s, 3F); **HRMS** (ESI)  $m/z$  [ $\text{M} + \text{H}$ ] $^+$  calcd for  $\text{C}_{13}\text{H}_{10}\text{F}_3\text{N}_2\text{O}_4$ , 315.0593, found 315.05892.

## 9.2 General procedure for synthesis of $\text{CF}_3$ -7, 8-dihydrophenanthridin-6(5H)-one (method B):

### General reaction:

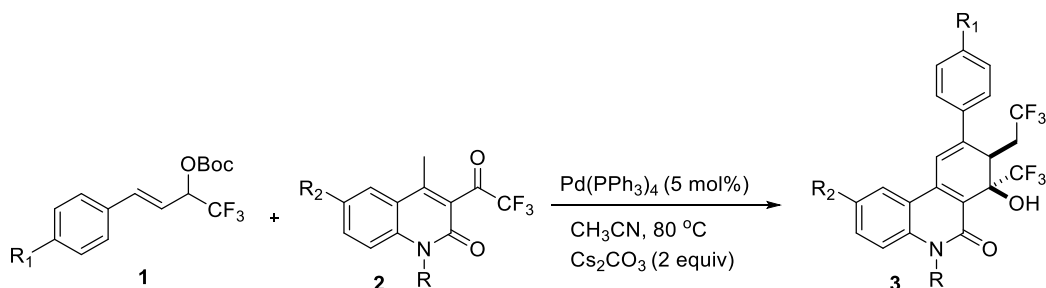

To a stirred solution of  $\text{CF}_3$ -allyl carbonate **1** (0.24 mmol) in 1 mL of acetonitrile was added 1,4-dimethyl-3-(2,2,2-trifluoroacetyl)quinolin-2(1H)-one **2** (0.2 mmol) at room temperature. Then, 5 mol % of  $\text{Pd}(\text{PPh}_3)_4$  and  $\text{Cs}_2\text{CO}_3$  (0.4 mmol) were added to the reaction mixture and stirred at 80 °C (oil bath temperature) for 3-6 h. The reaction progress was monitored by TLC. After completion of the reaction, mixture was diluted with water and extracted with ethyl acetate (3 X 15 mL). Combined organic layers were dried over sodium sulphate and concentrated on rotary evaporation. The obtained crude product was purified by flash column chromatography on silica gel 100-200 mesh using (hexane/ethyl acetate) to obtain the pure product 7-hydroxy-8-(2,2,2-trifluoroethyl)-7-(trifluoromethyl)-7,8-dihydrophenanthridin-6(5H)-one **3**. The characterization data of **3** are summarized below.

### 7-Hydroxy-5-methyl-9-phenyl-8-(2,2,2-trifluoroethyl)-7-(trifluoromethyl)-7,8-dihydrophenanthridin-6(5H)-one (**3a**)

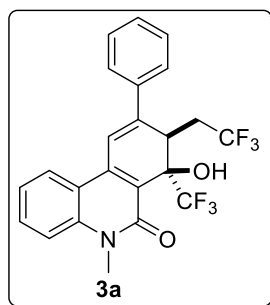

Following the general procedure **B**, **1a** (72.5 mg, 0.24 mmol), **2a** (53.8 mg, 0.2 mmol), Pd(PPh<sub>3</sub>)<sub>4</sub> (11.5 mg, 5 mol%), Cs<sub>2</sub>CO<sub>3</sub> (130 mg, 0.4 mmol) and 1 mL CH<sub>3</sub>CN were used. Compound **3a** was obtained as off-white solid, yield 83% (75.2 mg); mp: 168-170 °C; <sup>1</sup>H NMR (400 MHz, CDCl<sub>3</sub>) δ 9.33 (s, 1H), 8.09 (dd, *J* = 8.2, 1.3 Hz, 1H), 7.74 (m, 1H), 7.62 – 7.57 (m, 2H), 7.52 (d, *J* = 8.0 Hz, 1H), 7.51 – 7.40 (m, 4H), 7.20 (s, 1H), 3.81 (s, 3H), 3.75 (dd, *J* = 9.7, 3.3 Hz, 1H), 3.18 (m, 1H), 2.24 – 2.09 (m, 1H); <sup>13</sup>C NMR (126 MHz, CDCl<sub>3</sub>) δ 163.1, 149.7, 142.9, 140.1, 138.5, 132.4, 129.7, 128.9, 128.9 (q, *J* = 274.6 Hz), 126.8, 126.6 (q, *J* = 260.0 Hz), 125.4, 123.5, 117.9, 117.4, 115.4, 113.4, 76.68 (q, *J* = 28.4 Hz), 35.9, 33.9 (q, *J* = 29.4 Hz), 29.9; <sup>19</sup>F NMR (377 MHz, CDCl<sub>3</sub>) δ –61.94 (s, 3F), –79.92 (s, 3F); IR (KBr): 3051, 1632, 1589, 751 cm<sup>-1</sup>; HRMS(ESI): calcd for C<sub>23</sub>H<sub>18</sub>F<sub>6</sub>NO<sub>2</sub> [M + H]<sup>+</sup>: 454.1236, found: 454.1230.

**7-Hydroxy-5-methyl-9-(*p*-tolyl)-8-(2,2,2-trifluoroethyl)-7-(trifluoromethyl)-7,8-dihydrophenanthridin-6(5*H*)-one (3b)**

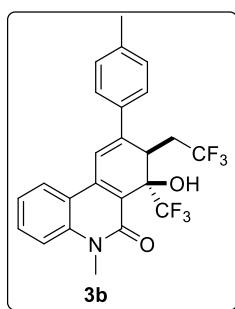

Following the general procedure **B**, **1b** (75.9 mg, 0.24 mmol), **2a** (53.8 mg, 0.2 mmol), Pd(PPh<sub>3</sub>)<sub>4</sub> (11.5 mg, 5 mol%), Cs<sub>2</sub>CO<sub>3</sub> (130 mg, 0.4 mmol) and 1 mL CH<sub>3</sub>CN were used. Compound **3b** was obtained as off-white solid, yield 81% (75.67 mg); mp: 223-225 °C; <sup>1</sup>H NMR (400 MHz, CDCl<sub>3</sub>) δ 9.32 (s, 1H), 8.09 (dd, *J* = 8.2, 1.2 Hz, 1H), 7.76 – 7.69 (m, 1H), 7.52 – 7.48 (m, 3H), 7.42 (m, 1H), 7.29 (s, 1H), 7.27 (s, 1H), 7.18 (s, 1H), 3.81 (s, 3H), 3.73 (dd, *J* = 9.6, 3.3 Hz, 1H), 3.25 – 3.10 (m, 1H), 2.42 (s, 3H), 2.15 (m, 1H); <sup>13</sup>C NMR (126 MHz, CDCl<sub>3</sub>) δ 163.1, 149.7, 143.1, 140.1, 140.0, 135.6, 132.4, 129.7, 128.8 (q, *J* = 250.1 Hz), 126.7, 126.6 (q, *J* = 255.4 Hz), 125.4, 123.4, 118.0, 116.5, 115.3, 113.2, 76.5 (q, *J* = 27.7 Hz), 35.9, 33.9 (q, *J* = 29.4 Hz), 29.9, 21.5; <sup>19</sup>F NMR (471 MHz, CDCl<sub>3</sub>) δ –61.89 (s, 3F), –79.93 (s, 3F); IR (KBr): 3050, 1630, 1582, 752 cm<sup>-1</sup>; HRMS (ESI): calcd for C<sub>24</sub>H<sub>20</sub>F<sub>6</sub>NO<sub>2</sub> [M + H]<sup>+</sup>: 468.1393, found: 468.1395

**7-Hydroxy-9-(4-methoxyphenyl)-5-methyl-8-(2,2,2-trifluoroethyl)-7-(trifluoromethyl)-7,8-dihydrophenanthridin-6(5*H*)-one (3c)**

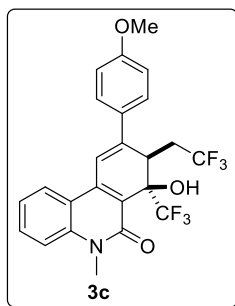

Following the general procedure **B**, **1c** (79.7 mg, 0.24 mmol), **2a** (53.8 mg, 0.2 mmol), Pd(PPh<sub>3</sub>)<sub>4</sub> (11.5 mg, 5 mol%), Cs<sub>2</sub>CO<sub>3</sub> (130 mg, 0.4 mmol) and 1 mL CH<sub>3</sub>CN were used. Compound **3c** was obtained as off-white solid, yield 82% (79.23 mg); mp: 218-216 °C; <sup>1</sup>H NMR(400 MHz, CDCl<sub>3</sub>) δ 9.33 (s, 1H), 8.09 (dd, *J* = 8.2, 1.2 Hz, 1H), 7.75 – 7.70 (m, 1H), 7.56 (d, *J* = 8.9 Hz, 2H), 7.51 (d, *J* = 8.0 Hz, 1H), 7.42 (m, 1H), 7.14 (s, 1H), 6.99 (d, *J* = 8.9 Hz, 2H), 3.88 (s, 3H), 3.81 (s, 3H), 3.72 (dd, *J* = 9.6, 3.3 Hz, 1H), 3.18 (m, 1H), 2.19 – 2.07 (m, 1H); <sup>13</sup>C NMR(101 MHz, CDCl<sub>3</sub>) δ 163.1, 161.0, 149.3, 143.2, 140.1, 132.3, 130.8, 129.2 (q, *J* = 251.9 Hz), 128.2, 127.8 (q, *J* = 274.7 Hz), 125.4, 123.4, 118.0, 115.4, 115.3, 114.4, 112.9, 77.5 (q, *J* = 32.4 Hz), 55.5, 35.9, 34.1 (q, *J* = 29.3 Hz), 29.9; <sup>19</sup>F NMR (376 MHz, CDCl<sub>3</sub>) δ -61.87 (s, 3F), -79.93 (s, 3F); IR (KBr): 3053, 1631, 1580, 753 cm<sup>-1</sup>; HRMS (ESI): calcd for C<sub>24</sub>H<sub>20</sub>F<sub>6</sub>NO<sub>3</sub> [M + H]<sup>+</sup>: 484.1342, found: 484.1336

**9-(4-Fluorophenyl)-7-hydroxy-5-methyl-8-(2,2,2-trifluoroethyl)-7-(trifluoromethyl)-7,8-dihydrophenanthridin-6(5H)-one (3d)**

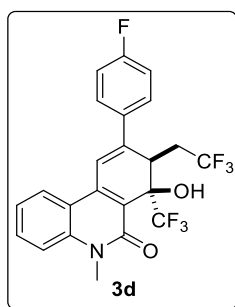

Following the general procedure **B**, **1f** (76.8 mg, 0.24 mmol), **2a** (53.8 mg, 0.2 mmol), Pd(PPh<sub>3</sub>)<sub>4</sub> (11.5 mg, 5 mol%), Cs<sub>2</sub>CO<sub>3</sub> (130 mg, 0.4 mmol) and 1 mL CH<sub>3</sub>CN were used. Compound **3d** was obtained as off-white solid, yield 76% (71.6 mg); mp: 208-210 °C; <sup>1</sup>H NMR (500 MHz, CDCl<sub>3</sub>) δ 9.32 (s, 1H), 8.07 (dd, *J* = 8.2, 1.0 Hz, 1H), 7.74 (ddd, *J* = 8.5, 7.2, 1.4 Hz, 1H), 7.59 – 7.55 (m, 2H), 7.52 (d, *J* = 8.3 Hz, 1H), 7.45 – 7.41 (m, 1H), 7.18 – 7.14 (m, 3H), 3.81 (s, 3H), 3.68 (dd, *J* = 9.9, 3.2 Hz, 1H), 3.19 (m, 1H), 2.21 – 2.08 (m, 1H); <sup>13</sup>C NMR (101 MHz, CDCl<sub>3</sub>) δ 163.7 (d, *J* = 250.3 Hz), 163.0, 148.6, 142.7, 140.1, 134.8, 132.5, 129.3

(q,  $J = 291.7$  Hz), 128.6 (d,  $J = 8.3$  Hz), 126.4 (q,  $J = 291.1$  Hz), 125.3, 123.5, 117.9, 117.3, 116.1 (d,  $J = 21.8$  Hz), 115.4, 113.4, 76.4 (q,  $J = 28.1$  Hz), 36.2, 33.9 (q,  $J = 29.3$  Hz), 29.9;  $^{19}\text{F}$  NMR (377 MHz,  $\text{CDCl}_3$ )  $\delta$  -61.91 (s, 3F), -79.87 (s, 3F), -111.34 (s, F); IR (KBr): 3052, 1629, 1579, 754  $\text{cm}^{-1}$ ; HRMS (ESI): calcd for  $\text{C}_{23}\text{H}_{17}\text{F}_7\text{NO}_2$   $[\text{M} + \text{H}]^+$ : 472.1142, found: 472.1134

**7-Hydroxy-5-methyl-8-(2,2,2-trifluoroethyl)-7-(trifluoromethyl)-9-(4-(trifluoromethyl)phenyl)-7,8-dihydrophenanthridin-6(5H)-one (3e)**

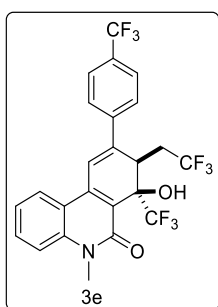

Following the general procedure **B**, **1g** (88.8 mg, 0.24 mmol), **2a** (53.8 mg, 0.2 mmol),  $\text{Pd}(\text{PPh}_3)_4$  (11.5 mg, 5 mol%),  $\text{Cs}_2\text{CO}_3$  (130 mg, 0.4 mmol) and 1 mL  $\text{CH}_3\text{CN}$  were used. Compound **3e** was obtained as off-white solid, yield 71% (74.0 mg); mp: 208-210  $^\circ\text{C}$ ;  $^1\text{H}$  NMR (500 MHz,  $\text{CDCl}_3$ )  $\delta$  9.31 (s, 1H), 8.08 (dd,  $J = 8.2, 1.1$  Hz, 1H), 7.78 – 7.74 (m, 1H), 7.74 – 7.68 (m, 4H), 7.54 (d,  $J = 8.3$  Hz, 1H), 7.47 – 7.43 (m, 1H), 7.24 (s, 1H), 3.82 (s, 3H), 3.71 (dd,  $J = 10.2, 3.2$  Hz, 1H), 3.20 (m, 1H), 2.18 (m, 1H);  $^{13}\text{C}$  NMR (101 MHz,  $\text{CDCl}_3$ )  $\delta$  162.9, 148.1, 142.3, 142.1, 140.1, 131.3 (q,  $J = 32.8$  Hz), 132.7, 127.0, 126.6 (q,  $J = 261.6$  Hz), 126.4 (q,  $J = 291.6$  Hz), 125.9 (q,  $J = 3.4$  Hz), 125.3, 124.0 (q,  $J = 271.9$  Hz), 123.6, 119.4, 117.8, 115.5, 113.9, 76.6 (q,  $J = 28.6$  Hz), 35.9, 33.9 (q,  $J = 29.3$  Hz), 30.0;  $^{19}\text{F}$  NMR (376 MHz,  $\text{CDCl}_3$ )  $\delta$  -61.90 (s, 3F), -62.72 (s, 3F), -79.79 (s, 3F); IR (KBr): 3051, 1632, 1581, 752  $\text{cm}^{-1}$ ; HRMS (ESI): calcd for  $\text{C}_{24}\text{H}_{17}\text{F}_9\text{NO}_2$   $[\text{M} + \text{H}]^+$ : 522.1110, found: 522.1110

**7-Hydroxy-5-methyl-9-(naphthalen-1-yl)-8-(2,2,2-trifluoroethyl)-7-(trifluoromethyl)-7,8-dihydrophenanthridin-6(5H)-one (3f)**

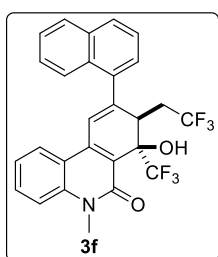

Following the general procedure **B**, **1h** (84.5 mg, 0.24 mmol), **2a** (53.8 mg, 0.2 mmol), Pd(PPh<sub>3</sub>)<sub>4</sub> (11.5 mg, 5 mol%), Cs<sub>2</sub>CO<sub>3</sub> (130 mg, 0.4 mmol) and 1 mL CH<sub>3</sub>CN were used. Compound **3f** was obtained as off-white solid, yield 70% (70.4 mg); mp: 258-260 °C; <sup>1</sup>H NMR (400 MHz, CDCl<sub>3</sub>) δ 9.45 (s, 1H), 8.30 (d, *J* = 8.2 Hz, 1H), 7.99 – 7.88 (m, 3H), 7.74 (m, 1H), 7.62 – 7.52 (m, 5H), 7.41 (t, *J* = 7.6 Hz, 1H), 7.24 (s, 1H), 3.84 (s, 3H), 3.76 (dd, *J* = 8.6, 3.0 Hz, 1H), 3.26 (m, 1H), 2.43 – 2.18 (m, 1H); <sup>13</sup>C NMR (101 MHz, CDCl<sub>3</sub>) δ 163.2, 147.3, 142.4, 140.2, 137.2, 134.4, 132.4, 131.0, 130.2 (q, *J* = 255.5 Hz), 129.5, 129.0, 126.9, 126.54 (q, *J* = 276.4 Hz), 126.2, 126.1, 125.4, 125.3, 125.1, 123.6, 121.5, 118.1, 115.4, 113.1, 76.5 (q, *J* = 28.2 Hz), 38.9, 33.3 (q, *J* = 29.9 Hz), 29.9; <sup>19</sup>F NMR (471 MHz, CDCl<sub>3</sub>) δ –62.83 (s, 3F), –80.01 (s, 3F); IR (KBr): 3055, 1639, 1575, 755 cm<sup>-1</sup>; HRMS (ESI): calcd for C<sub>27</sub>H<sub>20</sub>F<sub>6</sub>NO<sub>2</sub> [M + H]<sup>+</sup>: 504.1393, found: 504.1389

**7-Hydroxy-5-methyl-9-(thiophen-2-yl)-8-(2,2,2-trifluoroethyl)-7-(trifluoromethyl)-7,8-dihydrophenanthridin-6(5H)-one (3g)**

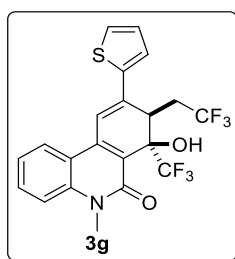

Following the general procedure **B**, **1i** (73.9 mg, 0.24 mmol), **2a** (53.8 mg, 0.2 mmol), Pd(PPh<sub>3</sub>)<sub>4</sub> (11.5 mg, 5 mol%), Cs<sub>2</sub>CO<sub>3</sub> (130 mg, 0.4 mmol) and 1 mL CH<sub>3</sub>CN were used. Compound **3g** was obtained as off-white solid, yield 72% (66.1 mg); mp: 180-182 °C; <sup>1</sup>H NMR (400 MHz, CDCl<sub>3</sub>) δ 9.37 (s, 1H), 8.04 (dd, *J* = 8.2, 1.2 Hz, 1H), 7.73 (m, 1H), 7.50 (d, *J* = 8.1 Hz, 1H), 7.46 – 7.40 (m, 2H), 7.38 (d, *J* = 3.6 Hz, 1H), 7.24 (s, 1H), 7.13 (dd, *J* = 5.1, 3.8 Hz, 1H), 3.80 (s, 3H), 3.67 (dd, *J* = 9.3, 3.4 Hz, 1H), 3.24 (m, 1H), 2.29 – 2.13 (m, 1H); <sup>13</sup>C NMR (101 MHz, CDCl<sub>3</sub>) δ 162.9, 142.9, 142.6, 142.0, 140.0, 132.5, 131.8 (q, *J* = 251.5 Hz), 128.5, 128.1, 127.5, 125.4, 123.5, 123.4 (q, *J* = 291.5 Hz), 117.8, 115.3, 114.4, 112.9, 76.3 (q, *J* = 28.1 Hz), 36.7, 34.1 (q, *J* = 29.6 Hz), 29.9; <sup>19</sup>F NMR (471 MHz, CDCl<sub>3</sub>) δ –61.81 (s, 3F), –80.10 (s, 3F); IR (KBr): 3042, 1638, 1575, 750 cm<sup>-1</sup>; HRMS (ESI): calcd for C<sub>21</sub>H<sub>16</sub>F<sub>6</sub>NO<sub>2</sub>S [M + H]<sup>+</sup>: 460.0800, found: 460.0799

**7-Hydroxy-5-methyl-9-phenyl-8-(2,2,2-trifluoro-1-phenylethyl)-7-(trifluoromethyl)-7,8-dihydrophenanthridin-6(5H)-one (3h)**

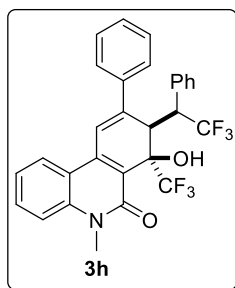

Following the general procedure **B**, **1j** (90.75 mg, 0.24 mmol), **2a** (53.8 mg, 0.2 mmol), Pd(PPh<sub>3</sub>)<sub>4</sub> (11.5 mg, 5 mol%), Cs<sub>2</sub>CO<sub>3</sub> (130 mg, 0.4 mmol) and 1 mL CH<sub>3</sub>CN were used. Compound **3h** was obtained as off-white solid, yield 55% (58.2 mg); mp: 204-206 °C; <sup>1</sup>H NMR (400 MHz, CDCl<sub>3</sub>) δ 9.67 (s, 1H), 7.70 – 7.65 (m, 3H), 7.61 – 7.56 (m, 1H), 7.54 (m, 2H), 7.48 (d, *J* = 7.2 Hz, 1H), 7.29 (d, *J* = 8.5 Hz, 1H), 7.24 (d, *J* = 7.3 Hz, 1H), 7.11 (t, *J* = 3.7 Hz, 3H), 6.72 (t, *J* = 7.7 Hz, 2H), 6.57 (t, *J* = 7.4 Hz, 1H), 4.81 (qd, *J* = 11.6, 2.2 Hz, 1H), 4.18 (d, *J* = 2.2 Hz, 1H), 3.67 (s, 3H); <sup>13</sup>C NMR (101 MHz, CDCl<sub>3</sub>) δ 162.3, 144.4, 142.8, 139.5, 139.4, 131.9, 131.8, 130.3, 129.4, 129.3 (q, *J* = 280.7 Hz), 129.1, 127.2, 127.0, 126.8, 126.4 (q, *J* = 251.1 Hz), 124.8, 122.9, 122.2, 117.4, 114.8, 113.8, 76.4 (q, *J* = 28.2 Hz), 47.4 (q, *J* = 27.6 Hz), 39.7, 29.6; <sup>19</sup>F NMR (471 MHz, CDCl<sub>3</sub>) δ -64.12 (s, 3F), -80.37 (s, 3F); IR (KBr): 3053, 1640, 1583, 749 cm<sup>-1</sup>; HRMS (ESI): calcd for C<sub>29</sub>H<sub>22</sub>F<sub>6</sub>NO<sub>2</sub> [M + H]<sup>+</sup>: 530.1549, found: 530.1548

**7-Hydroxy-5-methyl-9-(*p*-tolyl)-8-(2,2,2-trifluoro-1-phenylethyl)-7-(trifluoromethyl)-7,8-dihydrophenanthridin-6(5*H*)-one (**3i**)**

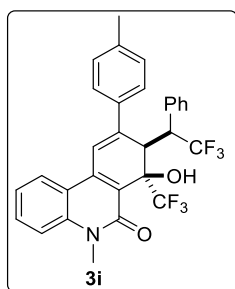

Following the general procedure **B**, **1k** (94.1 mg, 0.24 mmol), **2a** (53.8 mg, 0.2 mmol), Pd(PPh<sub>3</sub>)<sub>4</sub> (11.5 mg, 5 mol%), Cs<sub>2</sub>CO<sub>3</sub> (130 mg, 0.4 mmol) and 1 mL CH<sub>3</sub>CN were used. Compound **3i** was obtained as off-white solid, yield 50% (54.3 mg); mp: 196-198 °C; <sup>1</sup>H NMR (400 MHz, CDCl<sub>3</sub>) δ 9.67 (s, 1H), 7.67 (dd, *J* = 8.2, 1.2 Hz, 1H), 7.57 (dd, *J* = 8.3, 2.3 Hz, 3H), 7.33 (d, *J* = 7.9 Hz, 2H), 7.28 (d, *J* = 8.6 Hz, 1H), 7.24 – 7.22 (m, 1H), 7.10 (d, *J* = 7.5 Hz, 2H), 7.08 (s, 1H), 6.72 (m, 2H), 6.59 – 6.54 (m, 1H), 4.80 (qd, *J* = 11.7, 2.2 Hz, 1H), 4.17

(d,  $J = 2.3$  Hz, 1H), 3.67 (s, 3H), 2.45 (s, 3H);  $^{13}\text{C}$  NMR (126 MHz,  $\text{CDCl}_3$ )  $\delta$  162.3, 144.4, 142.9, 139.7, 139.4, 136.7, 131.9, 131.7, 130.3, 129.8, 128.54 (q,  $J = 292.2$  Hz), 127.2, 127.0, 126.7, 126.60 (q,  $J = 279.7$  Hz), 124.8, 122.8, 121.3, 117.51, 114.7, 113.6, 76.2 (q,  $J = 27.8$  Hz), 47.4 (q,  $J = 27.2$  Hz), 39.7, 29.6, 21.5;  $^{19}\text{F}$  NMR (376 MHz,  $\text{CDCl}_3$ )  $\delta$  -64.05 (s, 3F), -80.36 (s, 3F); IR (KBr): 3047, 1638, 1582, 748  $\text{cm}^{-1}$ ; HRMS (ESI): calcd for  $\text{C}_{30}\text{H}_{24}\text{F}_6\text{NO}_2$   $[\text{M} + \text{H}]^+$ : 544.1706, found: 544.1709

**7-Hydroxy-2,5-dimethyl-9-phenyl-8-(2,2,2-trifluoroethyl)-7-(trifluoromethyl)-7,8-dihydrophenanthridin-6(5H)-one (3j)**

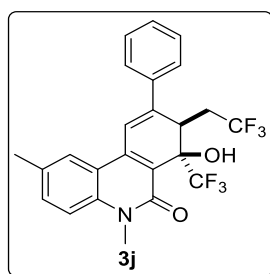

Following the general procedure **B**, **1a** (72.5 mg, 0.24 mmol), **2b** (56.6 mg, 0.2 mmol),  $\text{Pd}(\text{PPh}_3)_4$  (11.5 mg, 5 mol%),  $\text{Cs}_2\text{CO}_3$  (130 mg, 0.4 mmol) and 1 mL  $\text{CH}_3\text{CN}$  were used. Compound **3j** was obtained as off-white solid, yield 83% (77.5 mg); mp: 191-193  $^\circ\text{C}$ ;  $^1\text{H}$  NMR (400 MHz,  $\text{CDCl}_3$ )  $\delta$  9.41 (s, 1H), 7.84 (s, 1H), 7.61 (d,  $J = 7.0$  Hz, 2H), 7.55 (dd,  $J = 8.7, 1.4$  Hz, 1H), 7.51 – 7.43 (m, 3H), 7.41 (d,  $J = 8.7$  Hz, 1H), 7.19 (s, 1H), 3.77 (s, 3H), 3.73 (dd,  $J = 9.7, 3.2$  Hz, 1H), 3.26 – 3.09 (m, 1H), 2.53 (s, 3H), 2.16 (m, 1H);  $^{13}\text{C}$  NMR (101 MHz,  $\text{CDCl}_3$ )  $\delta$  162.9, 149.5, 142.6, 138.6, 138.2, 133.7, 133.2, 129.6, 129.5 (q,  $J = 277.9$  Hz), 128.9, 126.8, 126.6 (q,  $J = 264.1$  Hz), 125.0, 117.9, 117.5, 115.3, 113.3, 77.5 (q,  $J = 31.5$  Hz), 35.9, 33.9 (q,  $J = 29.4$  Hz), 29.9, 21.2;  $^{19}\text{F}$  NMR (471 MHz,  $\text{CDCl}_3$ )  $\delta$  -61.95 (3F, s), -79.88 (3F, s); IR (KBr): 3053, 1642, 1584, 753  $\text{cm}^{-1}$ ; HRMS (ESI): calcd for  $\text{C}_{24}\text{H}_{20}\text{F}_6\text{NO}_2$   $[\text{M} + \text{H}]^+$ : 468.1393, found: 468.1387

**2-Chloro-7-hydroxy-5-methyl-9-phenyl-8-(2,2,2-trifluoroethyl)-7-(trifluoromethyl)-7,8-dihydrophenanthridin-6(5H)-one (3k)**



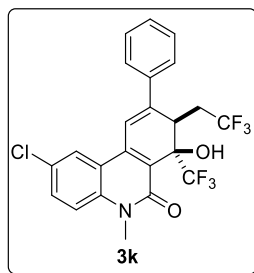

Following the general procedure **B**, **1a** (72.5 mg, 0.24 mmol), **2c** (60.6 mg, 0.2 mmol), Pd(PPh<sub>3</sub>)<sub>4</sub> (11.5 mg, 5 mol%), Cs<sub>2</sub>CO<sub>3</sub> (130 mg, 0.4 mmol) and 1 mL CH<sub>3</sub>CN were used. Compound **3k** was obtained as off-white solid, yield 69% (67.2 mg); mp: 222-224 °C; <sup>1</sup>H NMR (400 MHz, CDCl<sub>3</sub>) δ 9.16 (s, 1H), 8.02 (d, *J* = 2.3 Hz, 1H), 7.67 (dd, *J* = 9.1, 2.3 Hz, 1H), 7.60 (dd, *J* = 8.0, 1.5 Hz, 2H), 7.52 – 7.43 (m, 4H), 7.08 (s, 1H), 3.79 (s, 3H), 3.75 (dd, *J* = 9.5, 3.3 Hz, 1H), 3.15 (m, 1H), 2.16 (m, 1H); <sup>13</sup>C NMR (101 MHz, CDCl<sub>3</sub>) δ 162.7, 150.3, 141.9, 138.6, 138.2, 132.4, 129.9, 129.3 (q, *J* = 276.9 Hz), 129.3, 129.1, 128.7, 126.8, 126.5 (q, *J* = 261.5 Hz), 124.8, 119.0, 116.8, 114.6, 77.5 (q, *J* = 35.0 Hz), 35.9, 33.9 (q, *J* = 29.5 Hz), 30.1; <sup>19</sup>F NMR (376 MHz, CDCl<sub>3</sub>) δ –61.93 (3F, s), –79.94 (3F, s); IR (KBr): 3047, 1645, 1575, 747 cm<sup>-1</sup>; HRMS (ESI): calcd for C<sub>23</sub>H<sub>17</sub>ClF<sub>6</sub>NO<sub>2</sub> [M + H]<sup>+</sup>: 488.0847, found: 488.0853

**7-Hydroxy-5-methyl-2,9-diphenyl-8-(2,2,2-trifluoroethyl)-7-(trifluoromethyl)-7,8-dihydrophenanthridin-6(5H)-one (3l)**

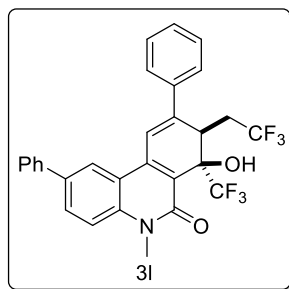

Following the general procedure **B**, **1a** (72.5 mg, 0.24 mmol), **2d** (69.0 mg, 0.2 mmol), Pd(PPh<sub>3</sub>)<sub>4</sub> (11.5 mg, 5 mol%), Cs<sub>2</sub>CO<sub>3</sub> (130 mg, 0.4 mmol) and 1 mL CH<sub>3</sub>CN were used. Compound **3l** was obtained as yellow solid, yield 71% (75.1 mg); mp: 194-196 °C; <sup>1</sup>H NMR (400 MHz, CDCl<sub>3</sub>) δ 9.32 (s, 1H), 8.21 (d, *J* = 2.0 Hz, 1H), 7.95 (dd, *J* = 8.8, 2.0 Hz, 1H), 7.68 – 7.64 (m, 2H), 7.60 (ddd, *J* = 8.7, 5.2, 3.5 Hz, 3H), 7.56 – 7.52 (m, 2H), 7.51 – 7.42 (m, 4H), 7.26 (s, 1H), 3.85 (s, 3H), 3.76 (dd, *J* = 9.6, 3.3 Hz, 1H), 3.19 (m, 1H), 2.20 (m, 1H); <sup>13</sup>C NMR (101 MHz, CDCl<sub>3</sub>) δ 162.9, 149.9, 142.9, 139.8, 139.3, 138.5, 136.8, 131.6, 129.7, 129.3, 129.0, 128.1, 127.4, 126.8, 126.40 (q, *J* = 274.3 Hz), 126.6 (q, *J* = 264.8 Hz), 123.5, 118.2, 117.3, 115.9, 113.8, 76.45 (d, *J* = 26.8 Hz), 36.0, 33.9 (q, *J* = 29.6 Hz), 30.0; <sup>19</sup>F NMR (376

**MHz, CDCl<sub>3</sub>**)  $\delta$  -61.93 (s, 3F), -79.89 (s, 3F); **IR (KBr)**: 3054, 1643, 1578, 750 cm<sup>-1</sup>; **HRMS (ESI)**: calcd for C<sub>29</sub>H<sub>22</sub>F<sub>6</sub>NO<sub>2</sub> [M + H]<sup>+</sup>: 530.1549, found: 530.1549.

**7-Hydroxy-5-methyl-2-nitro-9-phenyl-8-(2,2,2-trifluoroethyl)-7-(trifluoromethyl)-7,8-dihydrophenanthridin-6(5H)-one (3m)**

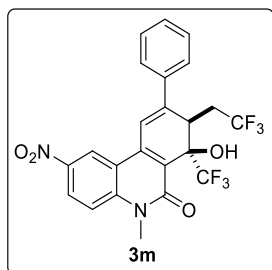

Following the general procedure **B**, **1a** (72.5 mg, 0.24 mmol), **2e** (62.8 mg, 0.2 mmol), Pd(PPh<sub>3</sub>)<sub>4</sub> (11.5 mg, 5 mol%), Cs<sub>2</sub>CO<sub>3</sub> (130 mg, 0.4 mmol) and 1 mL CH<sub>3</sub>CN were used. Compound **3m** was obtained as off-white solid, yield 51% (50.8 mg); mp: 122-124 °C; **<sup>1</sup>H NMR (400 MHz, CDCl<sub>3</sub>)**  $\delta$  8.98 (d, *J* = 2.4 Hz, 1H), 8.75 (s, 1H), 8.55 (dd, *J* = 9.3, 2.5 Hz, 1H), 7.65 – 7.58 (m, 3H), 7.52 (m, 3H), 7.18 (s, 1H), 3.86 (s, 3H), 3.80 (dd, *J* = 9.2, 3.5 Hz, 1H), 3.13 (m, 1H), 2.20 (m, 1H); **<sup>13</sup>C NMR (101 MHz, CDCl<sub>3</sub>)**  $\delta$  163.1, 151.5, 143.8, 143.3, 142.9, 137.8, 132.4, 130.3, 129.2, 129.2 (q, *J* = 275.7 Hz), 128.0 (q, *J* = 270.5 Hz), 126.9, 126.6, 121.6, 117.6, 116.2, 115.5, 76.8 (q, *J* = 33.1 Hz), 36.0, 33.8 (q, *J* = 29.5 Hz), 30.6; **<sup>19</sup>F NMR (376 MHz, CDCl<sub>3</sub>)**  $\delta$  -61.88 (s, 3F), -80.04 (s, 3F); **IR (KBr)**: 3053, 1648, 1584, 752 cm<sup>-1</sup>; **HRMS (ESI)**: calcd for C<sub>23</sub>H<sub>17</sub>F<sub>6</sub>N<sub>2</sub>O<sub>4</sub> [M + H]<sup>+</sup>: 499.1087, found: 499.1088

**5-Benzyl-7-hydroxy-9-phenyl-8-(2,2,2-trifluoroethyl)-7-(trifluoromethyl)-7,8-dihydrophenanthridin-6(5H)-one (3n)**

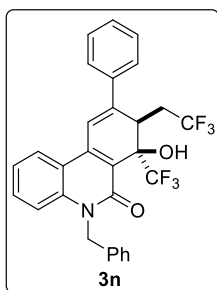

Following the general procedure **B**, **1a** (72.5 mg, 0.24 mmol), **2f** (69.0 mg, 0.2 mmol), Pd(PPh<sub>3</sub>)<sub>4</sub> (11.5 mg, 5 mol%), Cs<sub>2</sub>CO<sub>3</sub> (130 mg, 0.4 mmol) and 1 mL CH<sub>3</sub>CN were used. Compound **3n** was obtained as off-white solid, yield 73% (77.2 mg); mp: 188-190 °C; **<sup>1</sup>H NMR (500 MHz, CDCl<sub>3</sub>)**  $\delta$  9.32 (s, 1H), 8.09 (d, *J* = 7.3 Hz, 1H), 7.63 – 7.59 (m, 2H), 7.59 – 7.56

(m, 1H), 7.48 (m, 3H), 7.42 (d,  $J = 8.4$  Hz, 1H), 7.40 – 7.32 (m, 3H), 7.29 (d,  $J = 7.3$  Hz, 1H), 7.23 (m, 3H), 5.63 (d,  $J = 41.4$  Hz, 2H), 3.78 (dd,  $J = 9.5, 3.3$  Hz, 1H), 3.29 – 3.11 (m, 1H), 2.34 – 2.12 (m, 1H);  $^{13}\text{C}$  NMR (101 MHz,  $\text{CDCl}_3$ )  $\delta$  165.7, 161.9, 150.7, 140.7, 136.9, 135.9, 134.1, 130.3, 129.1, 128.9, 128.7 (q,  $J = 275.9$  Hz), 128.6, 128.0, 127.6, 126.5, 126.1 (q,  $J = 278.4$  Hz), 124.1, 123.7, 119.8, 116.4, 113.6, 109.1, 77.5 (q,  $J = 33.4$  Hz), 46.0, 30.7 (q,  $J = 30.9$  Hz);  $^{19}\text{F}$  NMR (471 MHz,  $\text{CDCl}_3$ )  $\delta$  -61.86 (s, 3F), -80.08 (s, 3F); IR (KBr): 3047, 1647, 1585, 751  $\text{cm}^{-1}$ ; HRMS (ESI): calcd for  $\text{C}_{29}\text{H}_{22}\text{F}_6\text{NO}_2$   $[\text{M} + \text{H}]^+$ : 530.1549, found: 530.1549

### 9.3 General procedure for synthesis of $\text{CF}_3$ -7-hydroxy-phenanthridin-6(5H)-one (method C):

#### General reaction:

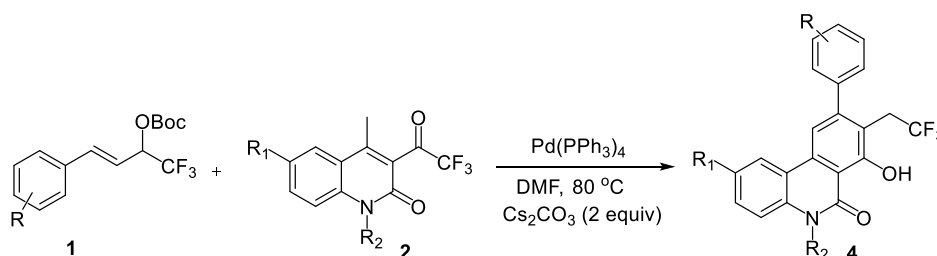

To a stirred solution of  $\text{CF}_3$ -allyl carbonate **1** (0.24 mmol) in 1 mL of *N,N*-dimethylformamide was added 1,4-dimethyl-3-(2,2,2-trifluoroacetyl)quinolin-2(1H)-one **2** (0.2 mmol) at room temperature. Then, 5 mol % of  $\text{Pd}(\text{PPh}_3)_4$  and  $\text{Cs}_2\text{CO}_3$  (0.4 mmol) were added to the reaction mixture and stirred at 100 °C (oil bath temperature) for 4-6 h. The reaction progress was monitored by TLC. After completion of the reaction, mixture was diluted with cold water and extracted with ethyl acetate (3 X 15 mL). Combined organic layers were dried over sodium sulphate and concentrated on rotary evaporation. The obtained crude product was purified by flash column chromatography on silica gel 100-200 mesh using (hexane/ethyl acetate) to obtain the pure product 7-hydroxy-8-(2,2,2-trifluoroethyl)phenanthridin-6(5H)-one **4**. The characterization data of **4** are summarized below.

#### 7-Hydroxy-5-methyl-9-phenyl-8-(2,2,2-trifluoroethyl)phenanthridin-6(5H)-one (4a)

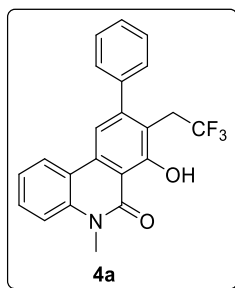

Following the general procedure **B**, **1a** (72.5 mg, 0.24 mmol), **2a** (53.8 mg, 0.2 mmol), Pd(PPh<sub>3</sub>)<sub>4</sub> (11.5 mg, 5 mol%), Cs<sub>2</sub>CO<sub>3</sub> (130 mg, 0.4 mmol) and 1 mL DMF were used. Compound **4a** was obtained as white solid, yield 82% (62.8mg); mp: 214-216 °C; <sup>1</sup>H NMR (400 MHz, CDCl<sub>3</sub>) δ 13.98 (s, 1H), 8.24 – 8.15 (m, 1H), 7.60 (s, 1H), 7.57 (m, 1H), 7.51 – 7.41 (m, 4H), 7.35 (m, 2H), 7.33 – 7.30 (m, 1H), 3.80 (s, 3H), 3.63 (q, *J* = 10.5 Hz, 2H); <sup>13</sup>C NMR (101 MHz, CDCl<sub>3</sub>) δ 165.5, 161.6, 150.3, 140.7, 137.5, 133.9, 130.3, 128.9, 128.5, 127.9, 126.1 (q, *J* = 279.2 Hz), 124.1, 123.6, 119.6, 115.4, 114.8, 113.5, 109.3, 30.7 (q, *J* = 30.7 Hz), 29.5; <sup>19</sup>F NMR (376 MHz, CDCl<sub>3</sub>) δ –63.69 (s, 3F); IR (KBr): 3095, 1630, 1582, 750 cm<sup>-1</sup>; HRMS (ESI): calcd for C<sub>22</sub>H<sub>17</sub>F<sub>3</sub>NO<sub>2</sub> [M + H]<sup>+</sup>: 384.1206, found: 384.1197

#### 7-Hydroxy-5-methyl-9-(p-tolyl)-8-(2,2,2-trifluoroethyl)phenanthridin-6(5H)-one (**4b**)

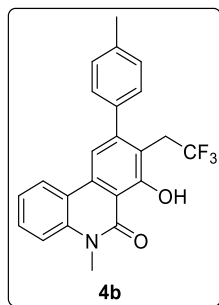

Following the general procedure **B**, **1b** (75.9 mg, 0.24 mmol), **2a** (53.8 mg, 0.2 mmol), Pd(PPh<sub>3</sub>)<sub>4</sub> (11.5 mg, 5 mol%), Cs<sub>2</sub>CO<sub>3</sub> (130 mg, 0.4 mmol) and 1 mL DMF were used. Compound **4b** was obtained as off-white solid, yield 81 % (64.3 mg); mp: 206-208 °C; <sup>1</sup>H NMR (400 MHz, CDCl<sub>3</sub>) δ 13.96 (s, 1H), 8.20 (dd, *J* = 8.1, 1.3 Hz, 1H), 7.59 (s, 1H), 7.59 – 7.54 (m, 1H), 7.44 (dd, *J* = 8.5, 0.8 Hz, 1H), 7.34 – 7.30 (m, 1H), 7.28 (d, *J* = 7.8 Hz, 2H), 7.25 – 7.22 (m, 2H), 3.81 (s, 3H), 3.64 (q, *J* = 10.5 Hz, 2H), 2.45 (s, 3H); <sup>13</sup>C NMR (101 MHz, CDCl<sub>3</sub>) δ 165.3, 161.7, 150.2, 140.9, 135.5, 133.9, 133.2, 131.3, 128.9, 128.5, 126.1 (q, *J* = 280.0 Hz), 124.8, 124.2, 119.5, 115.3, 114.7, 113.4, 109.4, 30.7 (q, *J* = 31.0 Hz), 29.5, 21.1; <sup>19</sup>F NMR (471 MHz, CDCl<sub>3</sub>) δ –63.65 (s, 3F); IR (KBr): 3098, 1635, 1583, 752 cm<sup>-1</sup>; HRMS (ESI): calcd for C<sub>23</sub>H<sub>19</sub>F<sub>3</sub>NO<sub>2</sub> [M + H]<sup>+</sup>: 398.1362, found: 398.1360

**7-Hydroxy-9-(4-methoxyphenyl)-5-methyl-8-(2,2,2-trifluoroethyl)phenanthridin-6(5H)-one (4c)**

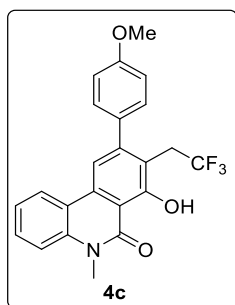

Following the general procedure **B**, **1c** (79.7 mg, 0.24 mmol), **2a** (53.8 mg, 0.2 mmol), Pd(PPh<sub>3</sub>)<sub>4</sub> (11.5 mg, 5 mol%), Cs<sub>2</sub>CO<sub>3</sub> (130 mg, 0.4 mmol) and 1 mL DMF were used. Compound **4c** was obtained as white solid, yield 83% (68.6 mg); mp: 200-202 °C; <sup>1</sup>H NMR (500 MHz, CDCl<sub>3</sub>) δ 13.96 (s, 1H), 8.21 (dd, *J* = 8.1, 1.3 Hz, 1H), 7.59 (s, 1H), 7.57 (m, 1H), 7.46 – 7.43 (m, 1H), 7.34 – 7.30 (m, 1H), 7.27 (d, *J* = 8.7 Hz, 2H), 7.02 – 6.99 (m, 2H), 3.89 (s, 3H), 3.81 (s, 3H), 3.64 (q, *J* = 10.5 Hz, 2H); <sup>13</sup>C NMR (126 MHz, CDCl<sub>3</sub>) δ 165.5, 161.6, 159.4, 150.1, 137.5, 133.8, 133.1, 130.2, 130.1, 126.2 (q, *J* = 278.9 Hz), 124.1, 123.6, 119.7, 115.4, 115.1, 113.9, 113.7, 109.2, 55.5, 30.8 (q, *J* = 30.5 Hz), 29.5; <sup>19</sup>F NMR (376 MHz, CDCl<sub>3</sub>) δ –63.62 (3F, s); IR (KBr): 3096, 1645, 1581, 754 cm<sup>-1</sup>; HRMS (ESI): calcd for C<sub>23</sub>H<sub>19</sub>F<sub>3</sub>NO<sub>3</sub> [M + H]<sup>+</sup>: 414.1312, found: 414.1308

**9-(3-Chlorophenyl)-7-hydroxy-5-methyl-8-(2,2,2-trifluoroethyl)phenanthridin-6(5H)-one (4d)**

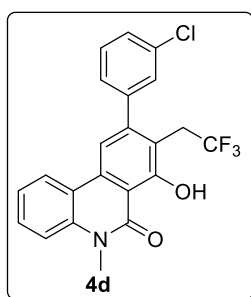

Following the general procedure **B**, **1d** (80.6 mg, 0.24 mmol), **2a** (53.8 mg, 0.2 mmol), Pd(PPh<sub>3</sub>)<sub>4</sub> (11.5 mg, 5 mol%), Cs<sub>2</sub>CO<sub>3</sub> (130 mg, 0.4 mmol) and 1 mL DMF were used. Compound **4d** was obtained as white solid, yield 79% (65.9 mg); mp: 222-224 °C; <sup>1</sup>H NMR (400 MHz, CDCl<sub>3</sub>) δ 14.02 (s, 1H), 8.24 – 8.09 (m, 1H), 7.59 – 7.53 (m, 2H), 7.44 – 7.39 (m, 3H), 7.36 – 7.29 (m, 2H), 7.25 – 7.22 (m, 1H), 3.78 (s, 3H), 3.61 (q, *J* = 10.4 Hz, 2H); <sup>13</sup>C

**NMR (126 MHz, CDCl<sub>3</sub>)**  $\delta$  165.3, 161.7, 148.6, 142.4, 137.5, 134.4, 134.0, 130.4, 129.8, 129.1, 128.2, 127.2, 126.0 (q,  $J = 279.1$  Hz), 124.0, 123.6, 119.4, 115.4, 114.6, 113.2, 109.5, 30.7 (q,  $J = 30.7$  Hz), 29.5; **<sup>19</sup>F NMR (376 MHz, CDCl<sub>3</sub>)**  $\delta$  -63.71 (3F, s); **IR (KBr):** 3093, 1640, 1582, 753 cm<sup>-1</sup>; **HRMS (ESI):** calcd for C<sub>22</sub>H<sub>16</sub>ClF<sub>3</sub>NO<sub>2</sub> [M + H]<sup>+</sup>: 418.0816, found: 418.0811

**9-(4-Chlorophenyl)-7-hydroxy-5-methyl-8-(2,2,2-trifluoroethyl)phenanthridin-6(5H)-one (4e)**

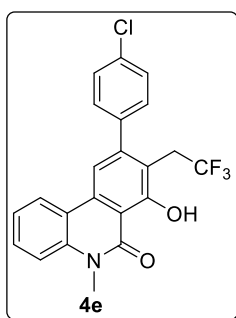

Following the general procedure **B**, **1e** (80.6 mg, 0.24 mmol), **2a** (53.8 mg, 0.2 mmol), Pd(PPh<sub>3</sub>)<sub>4</sub> (11.5 mg, 5 mol%), Cs<sub>2</sub>CO<sub>3</sub> (130 mg, 0.4 mmol) and 1 mL DMF were used. Compound **4e** was obtained as white solid, yield 77% (64.2 mg); mp: 211-213 °C; **<sup>1</sup>H NMR (400 MHz, CDCl<sub>3</sub>)**  $\delta$  14.01 (s, 1H), 8.19 (d,  $J = 7.3$  Hz, 1H), 7.61 – 7.53 (m, 2H), 7.50 – 7.41 (m, 3H), 7.36 – 7.31 (m, 1H), 7.28 (m, 2H), 3.80 (s, 3H), 3.60 (q,  $J = 10.4$  Hz, 2H); **<sup>13</sup>C NMR (101 MHz, CDCl<sub>3</sub>)**  $\delta$  165.4, 161.7, 149.0, 139.1, 137.5, 134.1, 134.0, 130.4, 130.3, 128.8, 126.0 (q,  $J = 279.3$  Hz), 124.0, 123.7, 119.5, 115.5, 114.7, 113.3, 109.5, 30.7 (q,  $J = 31.1$  Hz), 29.6; **<sup>19</sup>F NMR (376 MHz, CDCl<sub>3</sub>)**  $\delta$  -63.71 (3F, s); **IR (KBr):** 3092, 1643, 1579, 749 cm<sup>-1</sup>; **HRMS (ESI):** calcd for C<sub>22</sub>H<sub>16</sub>ClF<sub>3</sub>NO<sub>2</sub> [M + H]<sup>+</sup>: 418.0806, found: 418.0800

**9-(4-Fluorophenyl)-7-hydroxy-5-methyl-8-(2,2,2-trifluoroethyl)phenanthridin-6(5H)-one (4f)**

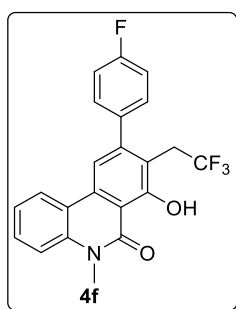

Following the general procedure **B**, **1f** (76.8 mg, 0.24 mmol), **2a** (53.8 mg, 0.2 mmol), Pd(PPh<sub>3</sub>)<sub>4</sub> (11.5 mg, 5 mol%), Cs<sub>2</sub>CO<sub>3</sub> (130 mg, 0.4 mmol) and 1 mL DMF were used. Compound **4f** was obtained as white solid, yield 76% (60.9 mg); mp: 201-203 °C; <sup>1</sup>H NMR (400 MHz, CDCl<sub>3</sub>) δ 14.00 (s, 1H), 8.21 (dd, *J* = 8.1, 1.2 Hz, 1H), 7.61 – 7.54 (m, 2H), 7.45 (d, *J* = 7.7 Hz, 1H), 7.36 – 7.29 (m, 3H), 7.20 – 7.14 (m, 2H), 3.81 (s, 3H), 3.60 (q, *J* = 10.4 Hz, 2H); <sup>13</sup>C NMR (101 MHz, CDCl<sub>3</sub>) δ 165.3, 162.6 (d, *J* = 247.3 Hz), 161.6, 149.2, 137.4, 136.6, 133.8, 130.7 (d, *J* = 8.0 Hz), 130.3, 126.1 (q, *J* = 279.0 Hz), 123.9, 123.6, 119.4, 115.6, 115.4, 115.3, 114.9, 113.4, 109.3, 30.7 (q, *J* = 30.9 Hz), 29.5; <sup>19</sup>F NMR (377 MHz, CDCl<sub>3</sub>) δ –69.31 (3F, s), –119.18 (1F, s); IR (KBr): 3097, 1640, 1585, 755 cm<sup>-1</sup>; HRMS (ESI): calcd for C<sub>22</sub>H<sub>16</sub>F<sub>4</sub>NO<sub>2</sub> [M + H]<sup>+</sup>: 402.1112, found: 402.1114

**7-Hydroxy-5-methyl-8-(2,2,2-trifluoroethyl)-9-(4-(trifluoromethyl)phenyl)-phenanthridin-6(5H)-one (4g)**

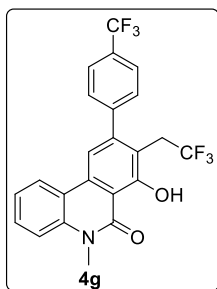

Following the general procedure **B**, **1g** (88.8 mg, 0.24 mmol), **2a** (53.8 mg, 0.2 mmol), Pd(PPh<sub>3</sub>)<sub>4</sub> (11.5 mg, 5 mol%), Cs<sub>2</sub>CO<sub>3</sub> (130 mg, 0.4 mmol) and 1 mL DMF were used. Compound **4g** was obtained as white solid, yield 75% (67.7 mg); mp: 226-228 °C; <sup>1</sup>H NMR (400 MHz, CDCl<sub>3</sub>) δ 14.06 (s, 1H), 8.20 (dd, *J* = 8.2, 1.2 Hz, 1H), 7.76 (s, 1H), 7.74 (s, 1H), 7.60 (m, 1H), 7.56 (s, 1H), 7.48 (m, 3H), 7.37 – 7.32 (m, 1H), 3.82 (s, 3H), 3.59 (q, *J* = 10.4 Hz, 2H); <sup>13</sup>C NMR (126 MHz, CDCl<sub>3</sub>) δ 165.4, 161.8, 148.7, 144.4, 137.6, 134.1, 131.9 (q, *J* = 32.1 Hz), 130.5, 129.4, 129.1 (q, *J* = 278.3 Hz), 125.8 (q, *J* = 251.2 Hz), 125.6, 124.1, 123.7, 119.4, 115.5, 114.5, 113.1, 109.7, 31.0 (q, *J* = 31.1 Hz), 29.6; <sup>19</sup>F NMR (377 MHz, CDCl<sub>3</sub>) δ –62.71 (s, 3F), –65.31 (s, 3F); IR (KBr): 3092, 1642, 1587, 747 cm<sup>-1</sup>; HRMS (ESI): calcd for C<sub>23</sub>H<sub>16</sub>F<sub>6</sub>NO<sub>2</sub> [M + H]<sup>+</sup>: 452.1080, found: 452.1093.

**7-Hydroxy-5-methyl-9-(naphthalen-1-yl)-8-(2,2,2-trifluoroethyl)phenanthridin-6(5H)-one (4h)**

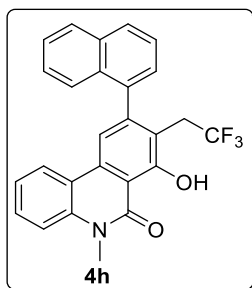

Following the general procedure **B**, **1h** (84.5 mg, 0.24 mmol), **2a** (53.8 mg, 0.2 mmol), Pd(PPh<sub>3</sub>)<sub>4</sub> (11.5 mg, 5 mol%), Cs<sub>2</sub>CO<sub>3</sub> (130 mg, 0.4 mmol) and 1 mL DMF were used. Compound **4h** was obtained as white solid, yield 72% (62.4 mg); mp: 240-242 °C; <sup>1</sup>H NMR (400 MHz, CDCl<sub>3</sub>) δ 14.06 (s, 1H), 8.15 (dd, *J* = 8.2, 1.3 Hz, 1H), 7.97 – 7.91 (m, 2H), 7.68 (s, 1H), 7.61 – 7.55 (m, 2H), 7.53 – 7.49 (m, 1H), 7.49 – 7.45 (m, 2H), 7.39 (m, 2H), 7.32 – 7.27 (m, 1H), 3.84 (s, 3H), 3.72 (m, 1H), 3.11 (m, 1H); <sup>13</sup>C NMR (126 MHz, CDCl<sub>3</sub>) δ 165.5, 161.7, 148.5, 137.6, 134.1, 133.6, 131.6, 130.3, 129.6, 128.6, 128.5, 127.5, 126.7, 126.2, 125.9 (q, *J* = 279.2 Hz), 125.5, 125.4, 124.2, 123.6, 119.6, 116.3, 115.4, 114.3, 109.6, 31.2 (q, *J* = 31.1 Hz), 29.6; <sup>19</sup>F NMR (377 MHz, CDCl<sub>3</sub>) δ –64.38 (s, 3F); IR (KBr): 3093, 1637, 1584, 749 cm<sup>-1</sup>; HRMS (ESI): calcd for C<sub>26</sub>H<sub>18</sub>F<sub>3</sub>NO<sub>2</sub> [M + H]<sup>+</sup>: 434.1362, found: 434.1356

**7-Hydroxy-5-methyl-9-(thiophen-2-yl)-8-(2,2,2-trifluoroethyl)phenanthridin-6(5H)-one (4i)**

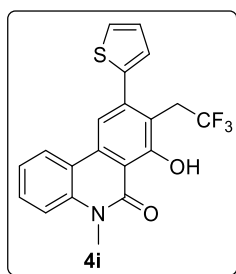

Following the general procedure **B**, **1i** (73.9 mg, 0.24mmol), **2a** (53.8 mg, 0.2 mmol), Pd(PPh<sub>3</sub>)<sub>4</sub> (11.5 mg, 5 mol%), Cs<sub>2</sub>CO<sub>3</sub> (130 mg, 0.4 mmol) and 1 mL DMF were used. Compound **4i** was obtained as white solid, yield 78% (60.7 mg); mp: 228-230 °C; <sup>1</sup>H NMR (400 MHz, CDCl<sub>3</sub>) δ 14.00 (s, 1H), 8.23 (dd, *J* = 8.1, 1.1 Hz, 1H), 7.76 (s, 1H), 7.62 – 7.55 (m, 1H), 7.47 – 7.42 (m, 2H), 7.38 – 7.31 (m, 1H), 7.17 (ddd, *J* = 8.5, 4.2, 2.4 Hz, 2H), 3.83 – 3.74 (m, 5H); <sup>13</sup>C NMR (126 MHz, CDCl<sub>3</sub>) δ 165.3, 161.9, 142.4, 141.2, 137.5, 133.8, 130.4, 127.8, 127.6, 126.7, 126.2 (q, *J* = 278.9 Hz), 124.1, 123.7, 119.4, 115.6, 115.4, 114.6, 109.6, 31.1 (q, *J* = 30.9 Hz), 29.5; <sup>19</sup>F NMR (376 MHz, CDCl<sub>3</sub>) δ –63.25 (3F, s); IR (KBr): 3092,



1675, 1577, 752  $\text{cm}^{-1}$ ; **HRMS (ESI)**: calcd for  $\text{C}_{20}\text{H}_{15}\text{F}_3\text{NO}_2\text{S}$   $[\text{M} + \text{H}]^+$ : 390.0770, found: 390.0774

**7-Hydroxy-2,5-dimethyl-9-phenyl-8-(2,2,2-trifluoroethyl)phenanthridin-6(5H)-one (4j)**

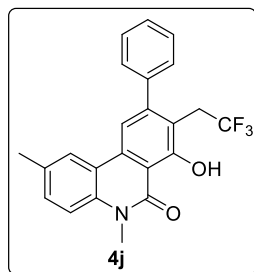

Following the general procedure **B**, **1a** (72.5 mg, 0.24mmol), **2b** (56.62 mg, 0.2 mmol),  $\text{Pd}(\text{PPh}_3)_4$  (11.5 mg, 5 mol%),  $\text{Cs}_2\text{CO}_3$  (130 mg, 0.4 mmol) and 1 mL  $\text{CH}_3\text{CN}$  were used. Compound **4j** was obtained as off-white solid, yield 65 % (51.6 mg); mp: 220-222  $^\circ\text{C}$ ;  **$^1\text{H}$  NMR (400 MHz,  $\text{CDCl}_3$ )**  $\delta$  14.06 (s, 1H), 7.99 (s, 1H), 7.58 (s, 1H), 7.51 – 7.43 (m, 3H), 7.40 – 7.31 (m, 4H), 3.79 (s, 3H), 3.63 (q,  $J = 10.5$  Hz, 2H), 2.44 (s, 3H);  **$^{13}\text{C}$  NMR (101 MHz,  $\text{CDCl}_3$ )**  $\delta$  165.3, 161.7, 150.2, 140.8, 135.4, 133.8, 133.2, 131.3, 128.9, 128.5, 127.9, 126.1 (q,  $J = 278.9$  Hz), 124.1, 119.5, 115.3, 114.6, 113.4, 109.4, 30.7 (q,  $J = 30.6$  Hz), 29.5, 21.1;  **$^{19}\text{F}$  NMR (376 MHz,  $\text{CDCl}_3$ )**  $\delta$  -63.70 (s, 3F); **IR (KBr)**: 3089, 1631, 1580, 751  $\text{cm}^{-1}$ ; **HRMS (ESI)**: calcd for  $\text{C}_{23}\text{H}_{19}\text{F}_3\text{NO}_2$   $[\text{M} + \text{H}]^+$ : 398.1362, found: 398.1358

**2-Chloro-7-hydroxy-5-methyl-9-phenyl-8-(2,2,2-trifluoroethyl)phenanthridin-6(5H)-one (4k)**

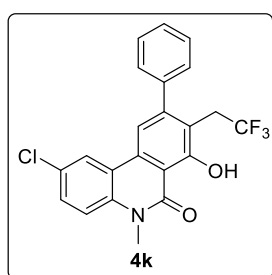

Following the general procedure **B**, **1a** (72.5 mg, 0.24 mmol), **2c** (60.61 mg, 0.2 mmol),  $\text{Pd}(\text{PPh}_3)_4$  (11.5 mg, 5 mol%),  $\text{Cs}_2\text{CO}_3$  (130 mg, 0.4 mmol) and 1 mL DMF were used. Compound **4k** was obtained as off-white solid, yield 72 % (72.1 mg); mp: 248-250  $^\circ\text{C}$ ;  **$^1\text{H}$  NMR (400 MHz,  $\text{CDCl}_3$ )**  $\delta$  13.88 (s, 1H), 8.15 (d,  $J = 2.3$  Hz, 1H), 7.52 (s, 1H), 7.51 – 7.44 (m, 4H), 7.38 – 7.32 (m, 3H), 3.78 (s, 3H), 3.64 (q,  $J = 10.4$  Hz, 2H);  **$^{13}\text{C}$  NMR (101 MHz,  $\text{CDCl}_3$ )**  $\delta$  165.3, 161.6, 148.9, 139.0, 137.4, 134.0, 133.9, 130.3, 130.2, 126.0 (q,  $J = 279.9$  Hz), 123.9,

123.6, 121.7, 119.4, 115.4, 114.6, 113.2, 109.4, 30.8 (q,  $J = 30.6$  Hz), 29.46;  $^{19}\text{F}$  NMR (376 MHz,  $\text{CDCl}_3$ )  $\delta$  -63.63 (s, 3F); IR (KBr): 3093, 1633, 1582, 756  $\text{cm}^{-1}$ ; HRMS (ESI): calcd for  $\text{C}_{22}\text{H}_{16}\text{ClF}_3\text{NO}_2$   $[\text{M} + \text{H}]^+$ : 418.0816, found: 418.0825.

#### 7-Hydroxy-5-methyl-2,9-diphenyl-8-(2,2,2-trifluoroethyl)phenanthridin-6(5H)-one (4l)

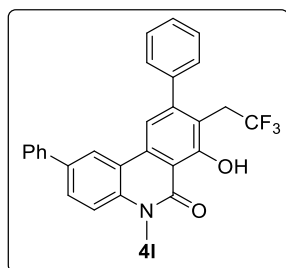

Following the general procedure **B**, **1a** (72.5 mg, 0.24 mmol), **2d** (69.02 mg, 0.2 mmol),  $\text{Pd}(\text{PPh}_3)_4$  (11.5 mg, 5 mol%),  $\text{Cs}_2\text{CO}_3$  (130 mg, 0.4 mmol) and 1 mL DMF were used. Compound **4l** was obtained as yellow solid, yield 63 % (57.8 mg); mp: 238-240  $^\circ\text{C}$ ;  $^1\text{H}$  NMR (400 MHz,  $\text{CDCl}_3$ )  $\delta$  14.00 (s, 1H), 8.37 (d,  $J = 2.0$  Hz, 1H), 7.79 (dd,  $J = 8.7, 2.0$  Hz, 1H), 7.66 (s, 1H), 7.65 – 7.61 (m, 2H), 7.52 – 7.49 (m, 1H), 7.50 – 7.45 (m, 4H), 7.44 (m, 1H), 7.40 – 7.34 (m, 3H), 3.83 (s, 3H), 3.64 (q,  $J = 10.5$  Hz, 2H);  $^{13}\text{C}$  NMR (126 MHz,  $\text{CDCl}_3$ )  $\delta$  165.5, 161.7, 148.5, 137.6, 134.1, 133.6, 131.6, 130.3, 128.7, 128.6, 127.5, 126.7, 126.2, 125.93 (q,  $J = 279.2$  Hz), 125.5, 125.4, 124.2, 123.6, 119.6, 115.4, 114.3, 109.6, 31.2 (q,  $J = 31.1$  Hz), 29.6;  $^{19}\text{F}$  NMR (376 MHz,  $\text{CDCl}_3$ )  $\delta$  -63.64 (s, 3F); IR (KBr): 3089, 1631, 1580, 751  $\text{cm}^{-1}$ ; HRMS (ESI): calcd for  $\text{C}_{28}\text{H}_{21}\text{F}_3\text{NO}_2$   $[\text{M} + \text{H}]^+$ : 460.1519, found: 460.1518

#### 5-Benzyl-7-hydroxy-9-phenyl-8-(2,2,2-trifluoroethyl)phenanthridin-6(5H)-one (4m)

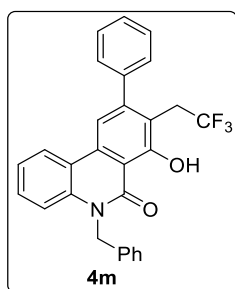

Following the general procedure **B**, **1a** (72.5 mg, 0.24 mmol), **2e** (69.02 mg, 0.2 mmol),  $\text{Pd}(\text{PPh}_3)_4$  (11.5 mg, 5 mol%),  $\text{Cs}_2\text{CO}_3$  (130 mg, 0.4 mmol) and 1 mL DMF were used. Compound **4m** was obtained as off-white solid, yield 68% (62.4 mg); mp: 216-218  $^\circ\text{C}$ ;  $^1\text{H}$  NMR (400 MHz,  $\text{CDCl}_3$ )  $\delta$  13.94 (s, 1H), 8.22 (dd,  $J = 8.2, 1.3$  Hz, 1H), 7.64 (s, 1H), 7.52 – 7.48 (m, 1H), 7.48 – 7.44 (m, 2H), 7.43 – 7.40 (m, 1H), 7.37 (m, 1H), 7.36 – 7.33 (m, 3H), 7.32 (m,

1H), 7.30 – 7.26 (m, 4H), 5.65 (s, 2H), 3.66 (q,  $J = 10.5$  Hz, 2H);  $^{13}\text{C}$  NMR (101 MHz,  $\text{CDCl}_3$ )  $\delta$  165.7, 161.9, 150.7, 140.7, 136.9, 135.9, 134.1, 130.3, 129.1, 128.9, 128.7, 128.0, 127.6, 126.5, 126.1 (q,  $J = 278.4$  Hz), 124.1, 123.7, 119.9, 116.4, 114.9, 113.6, 109.1, 46.1, 30.7 (q,  $J = 30.9$  Hz);  $^{19}\text{F}$  NMR (376 MHz,  $\text{CDCl}_3$ )  $\delta$  -63.64 (s, 3F); IR (KBr): 3094, 1638, 1586, 753  $\text{cm}^{-1}$ ; HRMS (ESI): calcd for  $\text{C}_{28}\text{H}_{21}\text{F}_3\text{NO}_2$   $[\text{M} + \text{H}]^+$ : 460.1519, found: 460.1522

#### 7-hydroxy-9-phenyl-8-(2,2,2-trifluoroethyl)-6H-benzo[*c*]chromen-6-one (5)

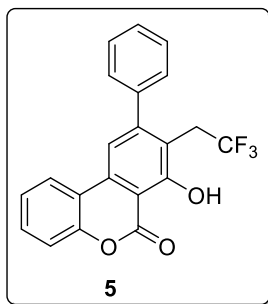

Following the general procedure A, **1a** (72.5 mg, 0.24 mmol), **2g** (46.4 mg, 0.2 mmol),  $\text{Pd}(\text{PPh}_3)_4$  (11.5 mg, 5 mol%) and 1 mL  $\text{CH}_3\text{CN}$  were used. Compound **5** was obtained as white solid, yield 26% (23.09 mg); mp: 195-197  $^\circ\text{C}$ ;  $^1\text{H}$  NMR (400 MHz,  $\text{CDCl}_3$ )  $\delta$  11.98 (s, 1H), 8.00 (dd,  $J = 8.0, 1.4$  Hz, 1H), 7.54 – 7.46 (m, 5H), 7.41 (dd,  $J = 8.3, 1.1$  Hz, 1H), 7.37 – 7.31 (m, 3H), 3.62 (q,  $J = 10.3$  Hz, 2H);  $^{13}\text{C}$  NMR (101 MHz,  $\text{CDCl}_3$ )  $\delta$  165.6, 161.9, 153.2, 150.9, 139.9, 134.5, 131.1, 128.7, 128.6, 128.4, 125.8 (q,  $J = 278.9$  Hz), 125.4, 123.5, 118.1, 117.9, 116.5, 114.3, 105.1, 30.8 (q,  $J = 31.1$  Hz);  $^{19}\text{F}$  NMR (376 MHz,  $\text{CDCl}_3$ )  $\delta$  -63.64 (s, 3F); IR (KBr): 3093, 1693, 1584, 752  $\text{cm}^{-1}$ ; HRMS (ESI): calcd for  $\text{C}_{21}\text{H}_{14}\text{F}_3\text{O}_3$   $[\text{M} + \text{H}]^+$ : 371.0890, found: 371.0901.

#### 9.4 General procedure for the synthesis of 5-methyl-9-phenyl-8-(2,2,2-trifluoroethyl)-7-(trifluoromethyl)phenanthridin-6(5H)-one (7)

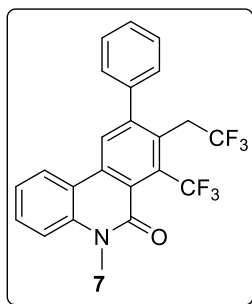

To a stirred solution of **3a** (100 mg, 0.22 mmol) in 1 mL of dichloromethane was added triflic acid (99.36 mg, 3 equiv) at 0  $^\circ\text{C}$  and allowed to stir in room temperature 24 h. The reaction

progress was monitored by TLC. After completion of the reaction, reaction mixture was quenched with aq. NaHCO<sub>3</sub> and extracted with ethyl acetate (3 X 15 mL). Combined organic layers were dried over sodium sulphate and concentrated on rotary evaporation. The obtained crude product was purified by flash column chromatography on silica gel 100-200 mesh using (hexane/ethyl acetate) to obtain the pure product **8** white in color with yield 51% (48.8 mg); mp: 192-194 °C; <sup>1</sup>H NMR (400 MHz, CDCl<sub>3</sub>) δ 8.29 (s, 1H), 8.18 – 8.14 (m, 1H), 7.62 – 7.56 (m, 1H), 7.52 (s, 1H), 7.50 (s, 1H), 7.48 (d, *J* = 6.9 Hz, 1H), 7.41 (d, *J* = 8.3 Hz, 1H), 7.38 – 7.31 (m, 2H), 7.29 (d, *J* = 8.0 Hz, 1H), 3.98 (q, *J* = 10.0 Hz, 2H), 3.80 (s, 3H); <sup>13</sup>C NMR (101 MHz, CDCl<sub>3</sub>) δ 159.7, 148.9, 140.0, 138.9, 134.8, 130.9 (d, *J* = 260.7 Hz), 130.9, 129.3, 129.0, 128.9, 128.6, 128.5, 127.3, 125.2 (q, *J* = 270.2 Hz), 124.9 (q, *J* = 278.5 Hz), 123.9, 122.7, 117.7, 115.1, 30.6, 35.6 (q, *J* = 31.4 Hz); <sup>19</sup>F NMR (377 MHz, CDCl<sub>3</sub>) δ -62.36 (s, 3F), -65.38 (s, 3F); IR (KBr): 1671, 1570, 756 cm<sup>-1</sup>; HRMS (ESI): calcd for C<sub>23</sub>H<sub>16</sub>F<sub>6</sub>NO [M + H]<sup>+</sup>: 436.1131, found: 436.1127

#### 9.5 General procedure for the synthesis of 5-methyl-6-oxo-9-phenyl-8-(2,2,2-trifluoroethyl)-5,6-dihydrophenanthridin-7-yl trifluoromethanesulfonate (**8**)

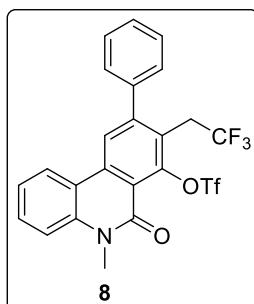

To a stirred solution of **4a** (100 mg, 0.22 mmol) in 1 mL of dichloromethane was added pyridine (3 equiv) and triflic anhydride (99.36 mg, 1.5 equiv) at 0 °C and allowed to stir in room temperature for 6 h. The reaction progress was monitored by TLC. After completion of the reaction, reaction mixture was quenched with cold water and extracted with ethyl acetate (3 X 15 mL). Combined organic layers were dried over sodium sulphate and concentrated on rotary evaporation. The obtained crude product was purified by flash column chromatography on silica gel 100-200 mesh using (hexane/ethyl acetate) to obtain the pure product which is white solid with yield 60% (68.0 mg); mp: 200-202 °C; <sup>1</sup>H NMR (400 MHz, CDCl<sub>3</sub>) δ 8.24 (s, 1H), 8.21 (dd, *J* = 8.2, 1.0 Hz, 1H), 7.64 – 7.59 (m, 1H), 7.56 – 7.48 (m, 3H), 7.44 (d, *J* = 8.0 Hz, 1H), 7.35 (m, 2H), 7.32 – 7.29 (m, 1H), 3.83 (s, 3H), 3.72 (q, *J* = 9.8 Hz, 2H); <sup>13</sup>C NMR (101 MHz, CDCl<sub>3</sub>) δ 165.5, 161.6, 150.3, 140.7, 137.5, 133.9, 130.3, 128.9, 128.5, 127.9, 126.1 (q,

$J = 278.7$  Hz), 124.1, 123.6, 120.5, 119.6, 115.4, 114.9, 113.5, 109.3, 30.7 (q,  $J = 31.0$  Hz), 29.5;  $^{19}\text{F}$  NMR (376 MHz,  $\text{CDCl}_3$ )  $\delta$  -64.09 (s, 3F), -73.39 (s, 3F); IR (KBr): 1642, 1573, 761  $\text{cm}^{-1}$ ; HRMS (ESI): calcd for  $\text{C}_{23}\text{H}_{16}\text{F}_6\text{NO}_4\text{S}$   $[\text{M} + \text{H}]^+$ : 516.0699, found: 516.0698

### 9.6 General procedure for the synthesis of 5-methyl-9-phenyl-8-(2,2,2-trifluoroethyl)phenanthridin-6(5H)-one (9)

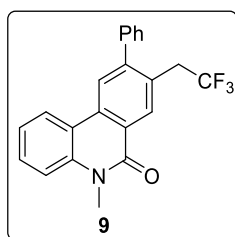

To a stirred solution of **9** (51 mg, 0.1 mmol) in 1mL of ethanol:water (4:1) was added sodium carbonate (20.58 mg, 2equiv) at room temperature. Then,  $\text{Pd}(\text{PPh}_3)_4$  (5.72mg, 5 mol%) was added to the reaction mixture and stirred at 80 °C (oil bath temperature) for 8h. The reaction progress was monitored by TLC. After completion of the reaction, reaction mixture was extracted with ethyl acetate (3 X 15 mL). Combined organic layers were dried over sodium sulphate and concentrated on rotary evaporation. The obtained crude product was purified by flash column chromatography on silica gel 100-200 mesh using (hexane/ethyl acetate) to obtain the pure product which is white solid with yield 85% (31.2 mg); mp: 170-172 °C;  $^1\text{H}$  NMR (500 MHz,  $\text{CDCl}_3$ )  $\delta$  8.65 (s, 1H), 8.23 (dd,  $J = 8.1, 1.1$  Hz, 1H), 8.17 (s, 1H), 7.56 (m, 1H), 7.53 – 7.46 (m, 3H), 7.44 (d,  $J = 8.5$  Hz, 1H), 7.39 – 7.36 (m, 2H), 7.32 – 7.28 (m, 1H), 3.84 (s, 3H), 3.53 (q,  $J = 10.6$  Hz, 2H);  $^{13}\text{C}$  NMR (126 MHz,  $\text{CDCl}_3$ )  $\delta$  161.3, 147.8, 140.2, 138.5, 133.1, 131.5, 130.1, 129.2, 128.7, 128.3, 128.1, 125.8 (q,  $J = 277.3$  Hz), 124.9, 124.0, 123.6, 122.7, 118.9, 115.3, 36.8 (q,  $J = 29.5$  Hz), 30.2;  $^{19}\text{F}$  NMR (376 MHz,  $\text{CDCl}_3$ )  $\delta$  -69.33 (s, 3F); IR (KBr): 1689, 1570, 737  $\text{cm}^{-1}$ ; HRMS (ESI): calcd for  $\text{C}_{22}\text{H}_{17}\text{F}_3\text{NO}$   $[\text{M} + \text{H}]^+$ : 368.1257, found: 368.1248.

## 10. Gram scale reaction of **3a** & **4a**.

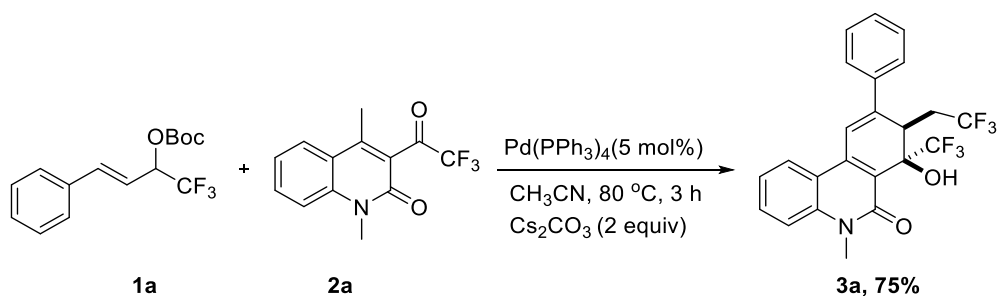

To a stirred solution of compound **1a** (1.4 gm, 4.5 mmol) in 10 mL CH<sub>3</sub>CN, were added **2a** (1 gm, 3.7 mmol), Pd(PPh<sub>3</sub>)<sub>4</sub> (214.7 mg, 5 mol%) and Cs<sub>2</sub>CO<sub>3</sub> (2.4 gm, 7.4 mmol) at room temperature and raised the temperature to 80 °C (oil bath). The reaction progress was monitored by TLC. After completion of the reaction, mixture was diluted with cold water and extracted with ethyl acetate (3 X 25 mL). Combined organic layers were dried over sodium sulphate and concentrated on rotary evaporation. The obtained crude product was purified by flash column chromatography on silica gel 100-200 mesh using (hexane/ethyl acetate) to obtain the pure product **3a** (yield 75%, 1.3 gm).

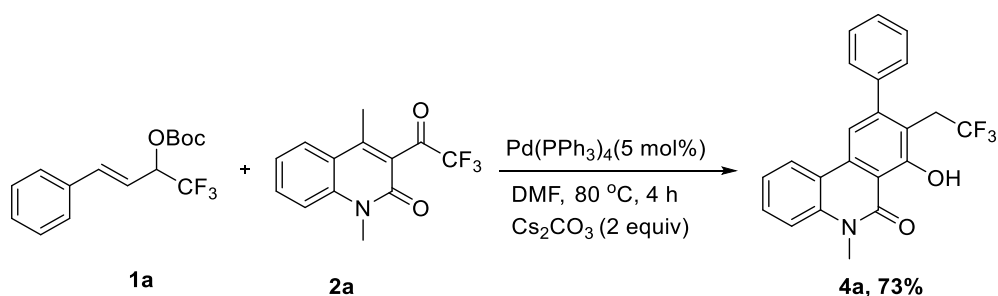

To a stirred solution of compound **1a** (1.4 gm, 4.5 mmol) in 10 mL DMF, were added **2a** (1 gm, 3.7 mmol), Pd(PPh<sub>3</sub>)<sub>4</sub> (214.7 mg, 5 mol%) and Cs<sub>2</sub>CO<sub>3</sub> (2.4 gm, 7.4 mmol) at room temperature and raised the temperature to 80 °C (oil bath). The reaction progress was monitored by TLC. After completion of the reaction, mixture was diluted with cold water and extracted with ethyl acetate (3 X 25 mL). Combined organic layers were dried over sodium sulphate and concentrated on rotary evaporation. The obtained crude product was purified by flash column chromatography on silica gel 100-200 mesh using (hexane/ethyl acetate) to obtain the pure product **4a** (yield 73%, 1.03 gm).

## 11. X-ray analysis data of 3a

### X-ray Crystallography.

X-ray data for the compound **3a** was collected at room temperature on a Bruker D8 QUEST instrument with an I $\mu$ S Mo microsource ( $\lambda = 0.7107$  Å) and a PHOTON-III detector. The raw data frames were reduced and corrected for absorption effects using the Bruker Apex 3 software suite programs.<sup>11</sup> The structure was solved using intrinsic phasing method and further refined with the SHELXL<sup>12</sup> program and expanded using Fourier techniques. Anisotropic displacement parameters were included for all non-hydrogen atoms. The O-H atoms were located in the difference Fourier map and its positions and isotropic displacement parameters were refined. All C bound H atoms were positioned geometrically and treated as riding on their parent C atoms [C-H = 0.93-0.97 Å, and U<sub>iso</sub>(H) = 1.5U<sub>eq</sub>(C) for methyl H or 1.2U<sub>eq</sub>(C) for other H atoms].

### **Crystal structure determination of 3a:**

**Crystal Data** for C<sub>23</sub>H<sub>17</sub>NO<sub>2</sub>F<sub>6</sub> ( $M = 453.38$  g/mol): monoclinic, space group P2<sub>1</sub>/n (no. 14),  $a = 11.4138(11)$  Å,  $b = 11.2940(11)$  Å,  $c = 15.5406(13)$  Å,  $\beta = 97.968(3)^\circ$ ,  $V = 1984.0(3)$  Å<sup>3</sup>,  $Z = 4$ ,  $T = 294.15$  K,  $\mu(\text{MoK}\alpha) = 0.135$  mm<sup>-1</sup>,  $D_{\text{calc}} = 1.518$  g/cm<sup>3</sup>, 21908 reflections measured ( $4.474^\circ \leq 2\theta \leq 56.628^\circ$ ), 4904 unique ( $R_{\text{int}} = 0.0515$ ,  $R_{\text{sigma}} = 0.0489$ ) which were used in all calculations. The final  $R_1$  was 0.0546 ( $I > 2\sigma(I)$ ) and  $wR_2$  was 0.1442 (all data). **CCDC** 2360628 deposition number contains the supplementary crystallographic data for this paper which can be obtained free of charge at <https://www.ccdc.cam.ac.uk/structures/>

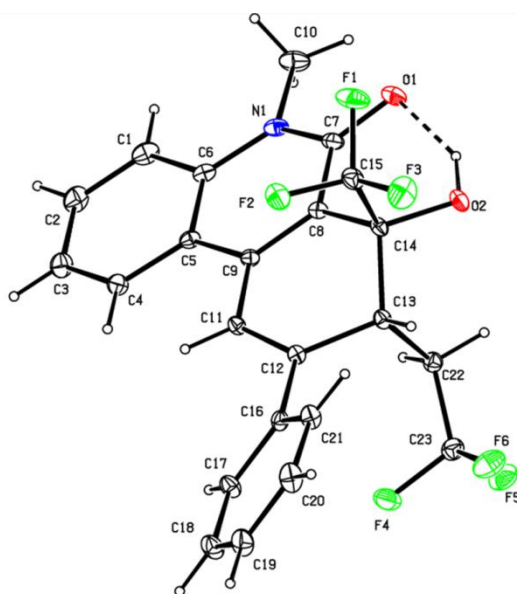

**Figure caption:** ORTEP diagram of KA1169 compound with the atom-numbering. Displacement ellipsoids are drawn at the 30% probability level and H atoms are shown as small spheres of arbitrary radius.

## 12. References:

1. Miertus, S.; Scrocco, E.; Tomasi, J. Electrostatic Interaction of a Solute With A Continuum. A Direct Utilizaion of AB Initio Molecular Potentials For The Prevision of Solvent Effects. *J. Chem. Phys.*, **1981**,*55*, 117–129.
2. Cossi, M.; Barone, V.; Cammi, R.; Tomasi, J. Ab Initio Study of Solvated Molecules: A New Implementation of The Polarizable Continuum Model. *Chem. Phys. Lett.*, **1996**, *255*, 327–335.
3. O’Boyle, N. M.; Tenderholt, A. L.; Langner, K. M. cclib: A Library for Package-Independent Computational Chemistry Algorithms. *J. Comput. Chem.*, **2008**, *29*, 839–845.
4. Dennington, R.; Keith, T.; Millam, J. Gaussview, version 5, Semichem Inc., Shawnee Mission KS, **2009**.
5. Heravi, M. M.; Ghavidel, M.; Mohammadkhani, L. Beyond a solvent: triple roles of dimethylformamide in organic chemistry. *RSC Adv.*, **2018**, *8*, 27832-27862.
6. Surya Prakash, g. k.; Zhang, Z.; Wang, F.; Munoz, S.; Olah, G. A. Nucleophilic Trifluoromethylation of Carbonyl Compounds: Trifluoroacetaldehyde Hydrate as a Trifluoromethyl Source. *J. Org. Chem.* **2013**, *78*, 3300–3305.
7. Priyanka, C.; Subbarao, M.; Nagender, P. Palladium-catalyzed ortho-vinylation of  $\beta$ -naphthols with  $\alpha$ -trifluoromethyl allyl carbonates: One-pot access to naphtho[2,1-b]furans. *Org. Biomol. Chem.*, **2021**,*19*, 8241-8245.
8. Madhu, D.; Jetti, V. R.; Narsaiah, B.; Nagender, P. 3-Trifluoroacetyl-quinolin-2(1H)-ones as Carbonyl and Acid Surrogates in the Passerini-/Ugi-TypeReaction. *J. org. chem.* **2022**, *87*, 5, 2301-2314.
9. Zhao, Q. K.; Wu, X.; Yang, F.; Yan, P. C.; Xie, J. H.; Zhou, Q. L. Catalytic asymmetric hydrogenation of 3-ethoxycarbonyl quinolin-2-ones and coumarins. *Org. Lett.* **2021**, *23*, 9, 3593-3598.



10. Wang, W.; Xiong, Q.; Gong, L.; Wang, Y.; Liu, J.; Lan, Y.; Zhang, X. *Org. Lett.* **2020**, *22*, *14*, 5479–5485.
11. Bruker (2016). APEX3, SAINT and SADABS. Bruker AXS, Inc., Madison, Wisconsin, USA.
12. Sheldrick G. M. (2015). *Acta Crystallogr C* *71*: 3-8.

**13.  $^1\text{H}$  NMR,  $^{13}\text{C}$  NMR and  $^{19}\text{F}$  spectral copies of compound**

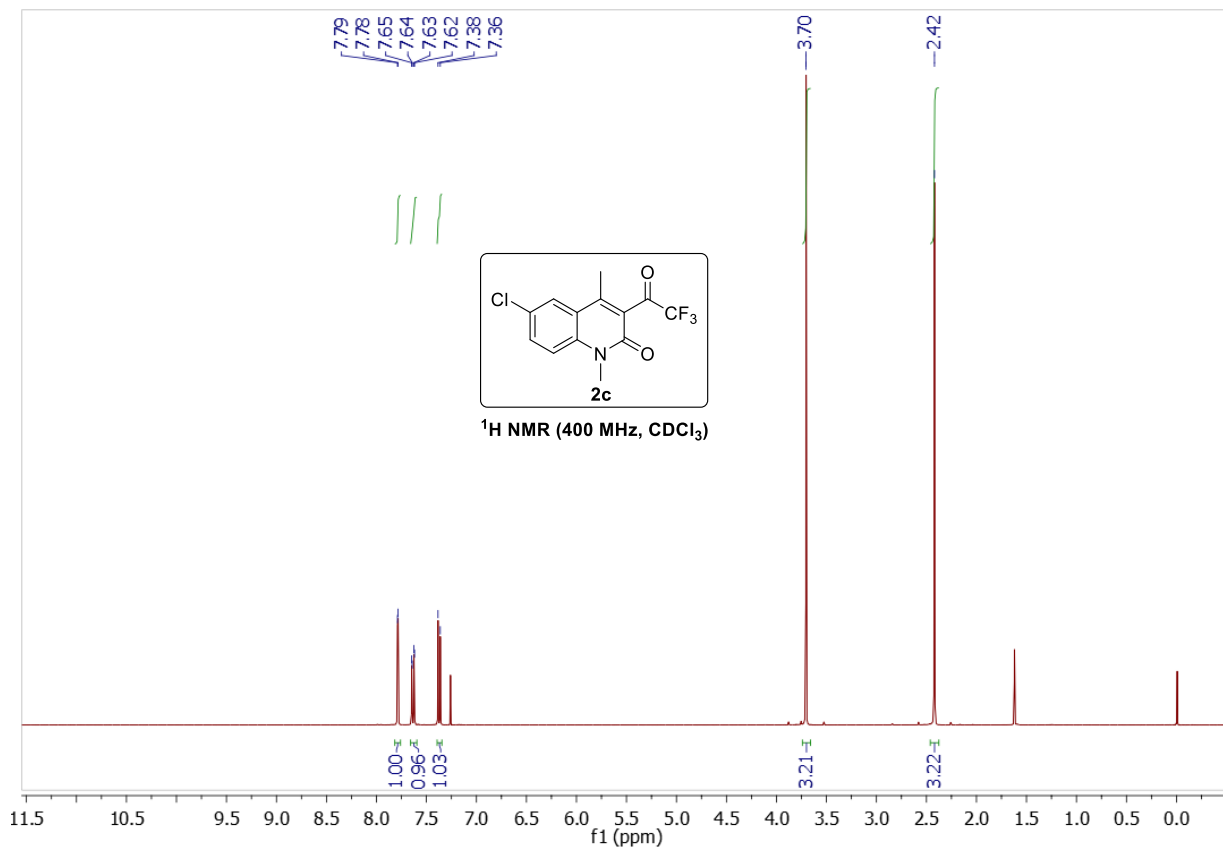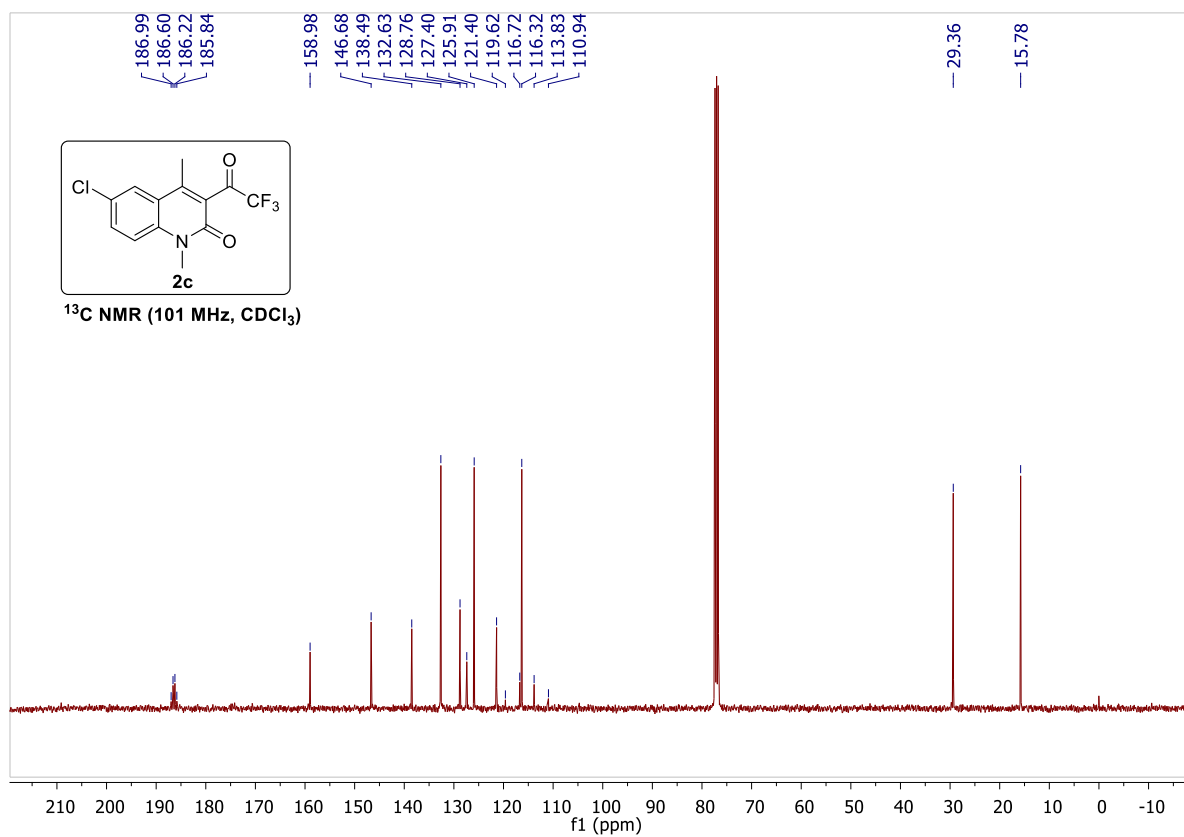

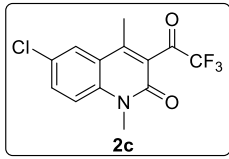

<sup>19</sup>F NMR, 377 MHz, CDCl<sub>3</sub>

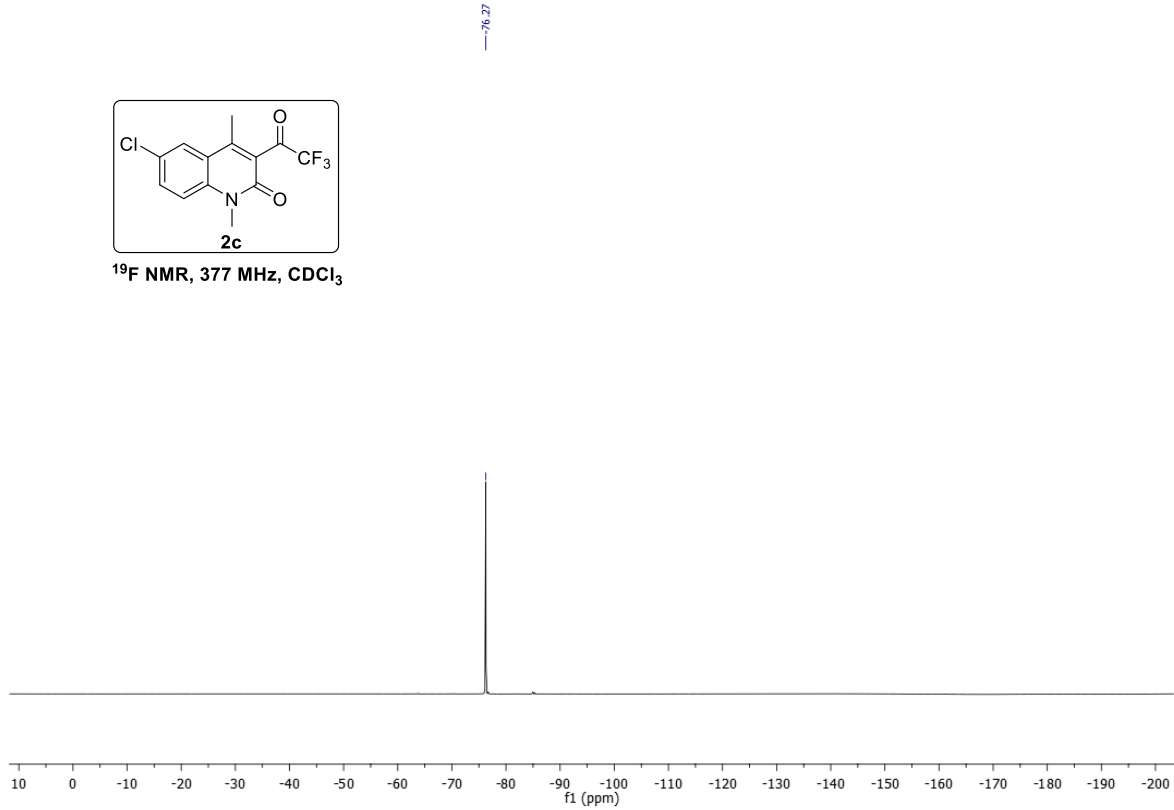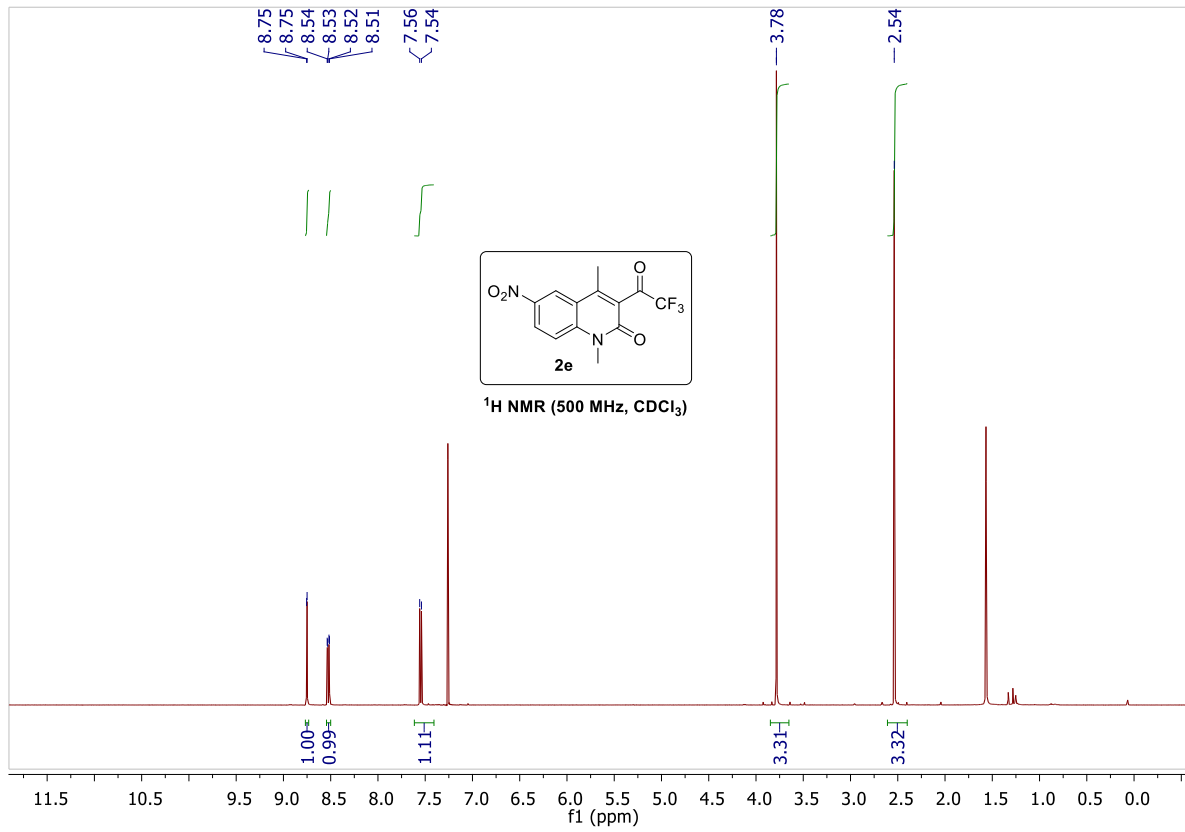

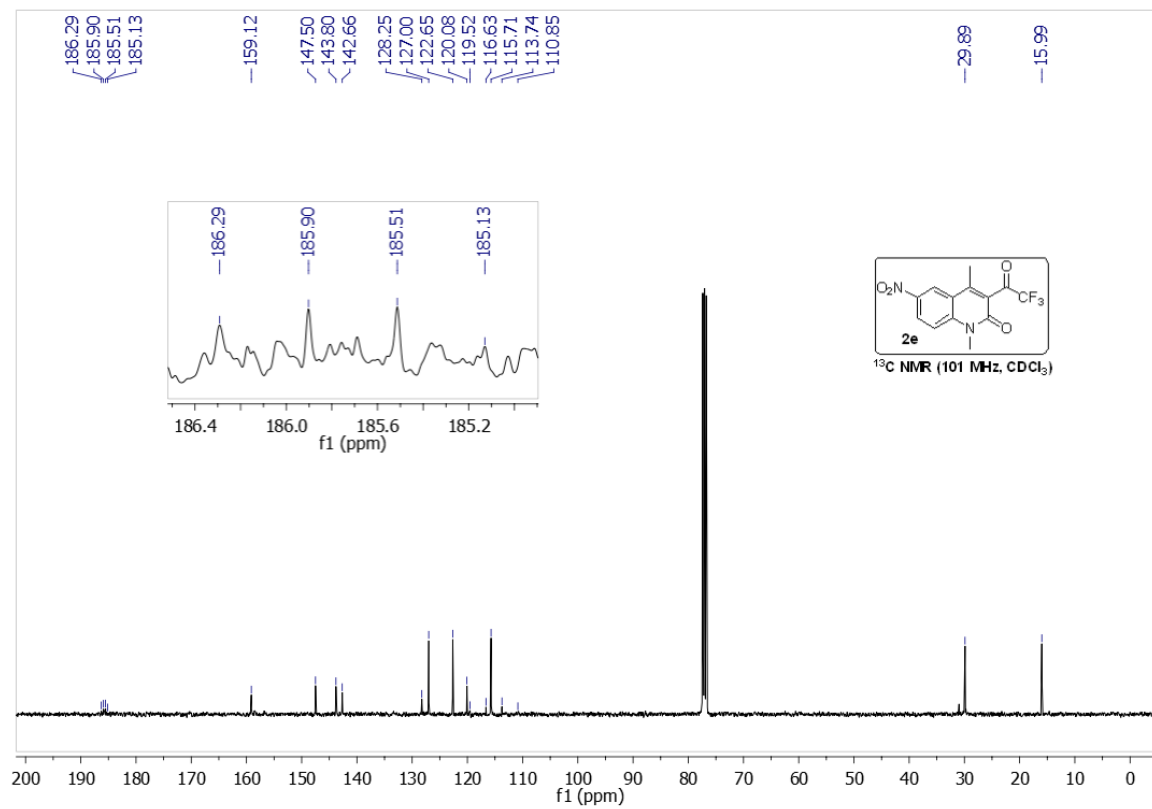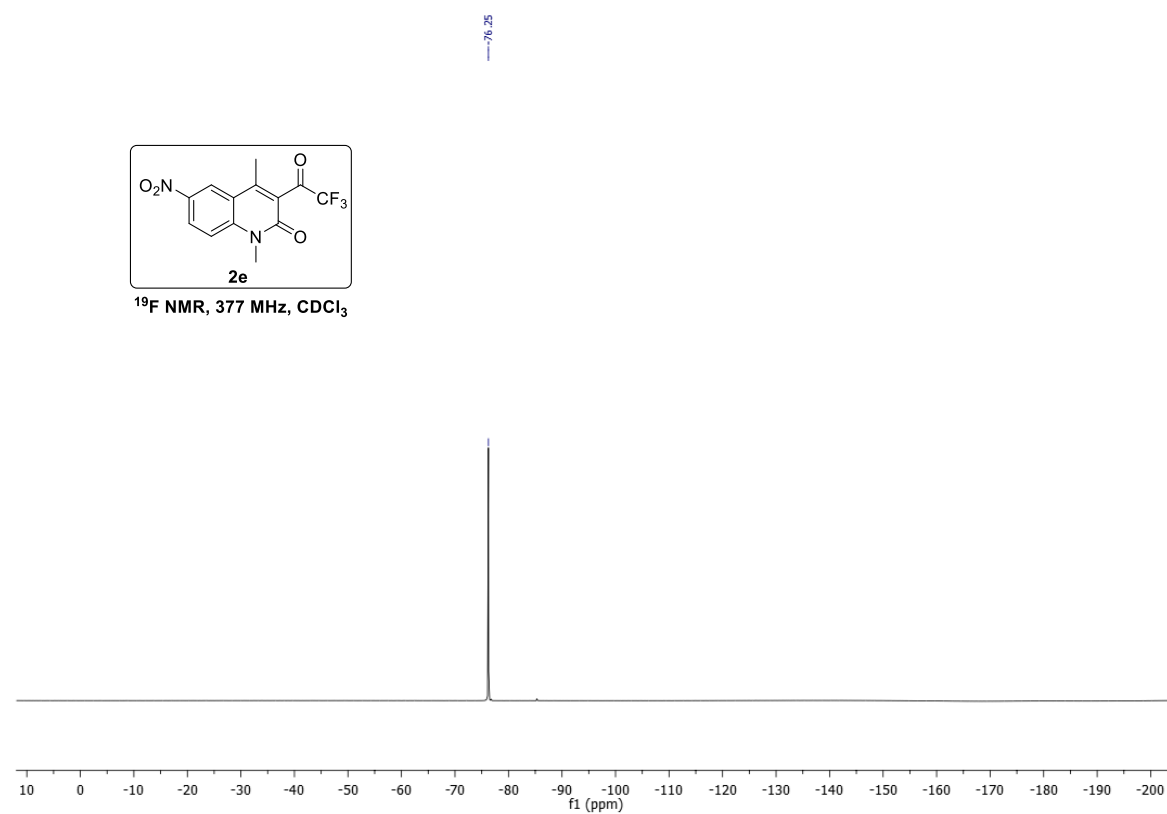

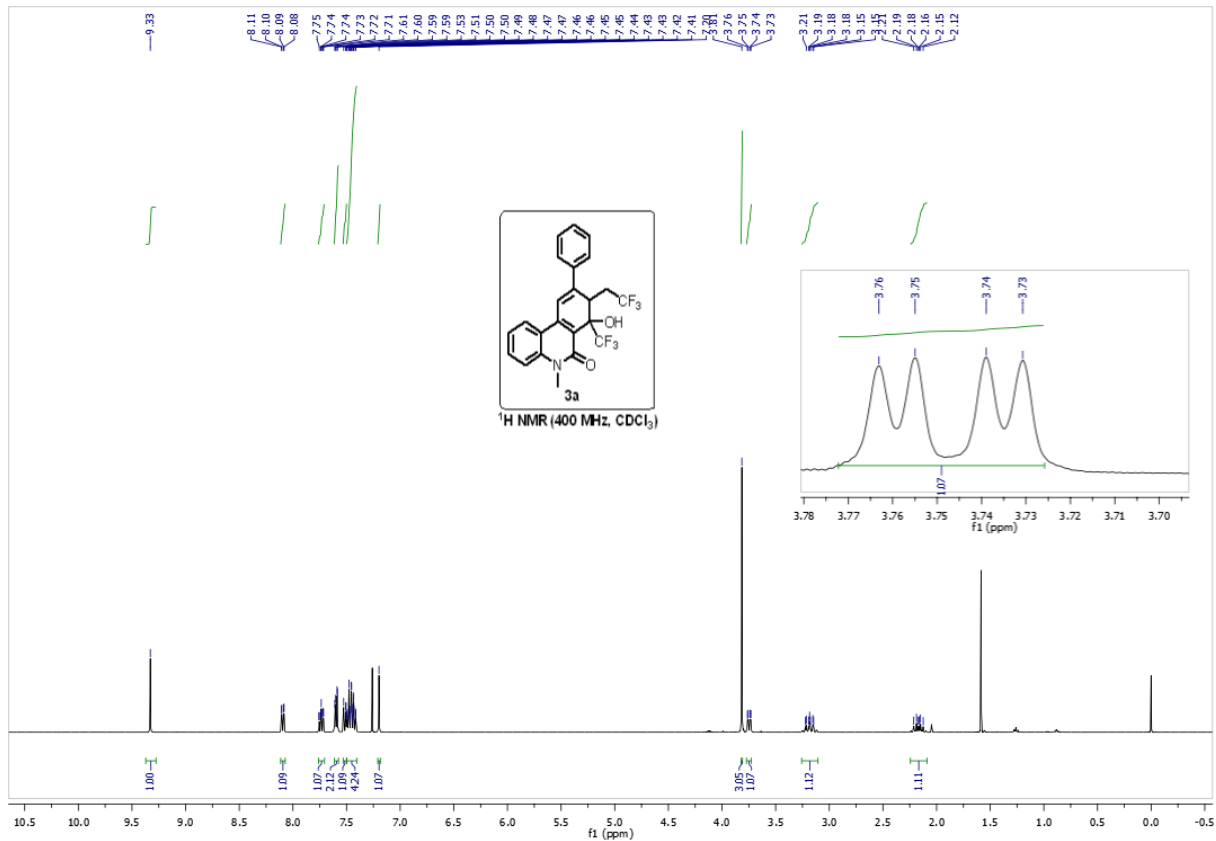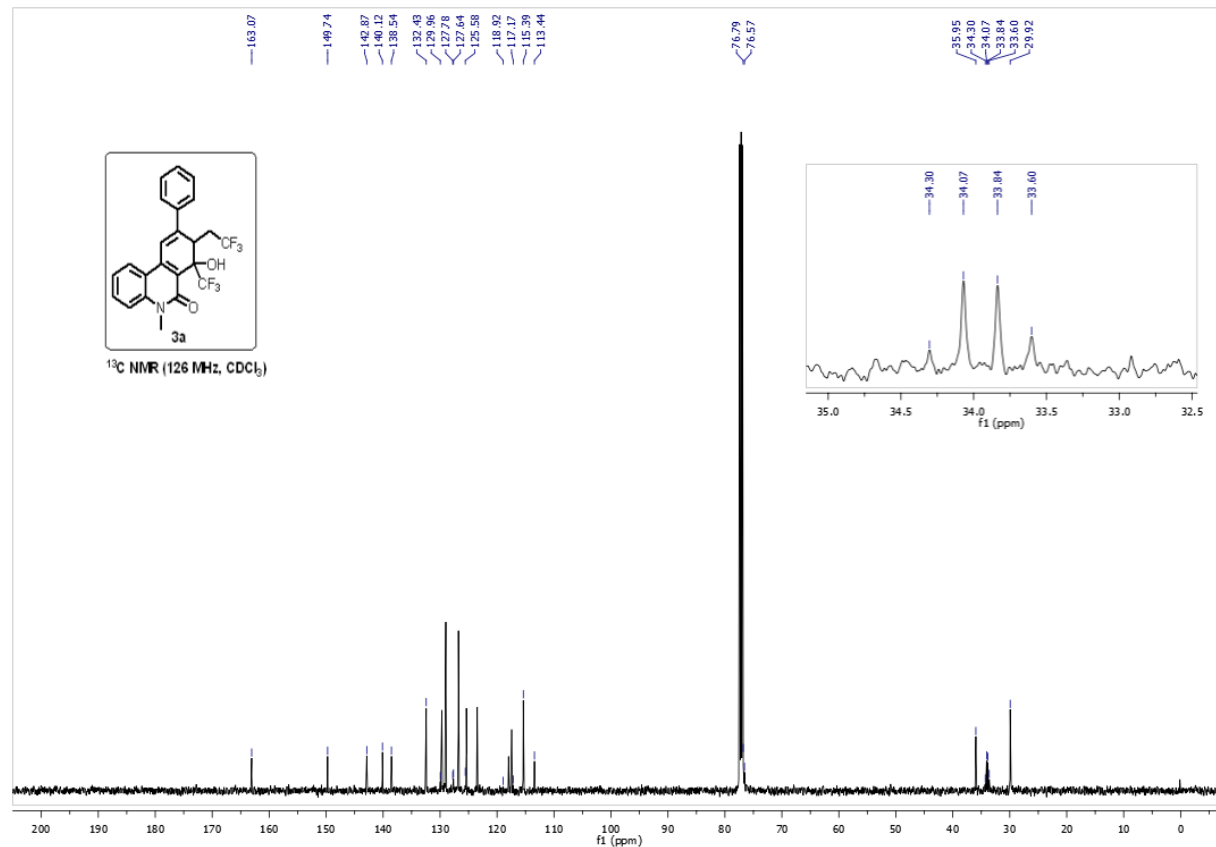



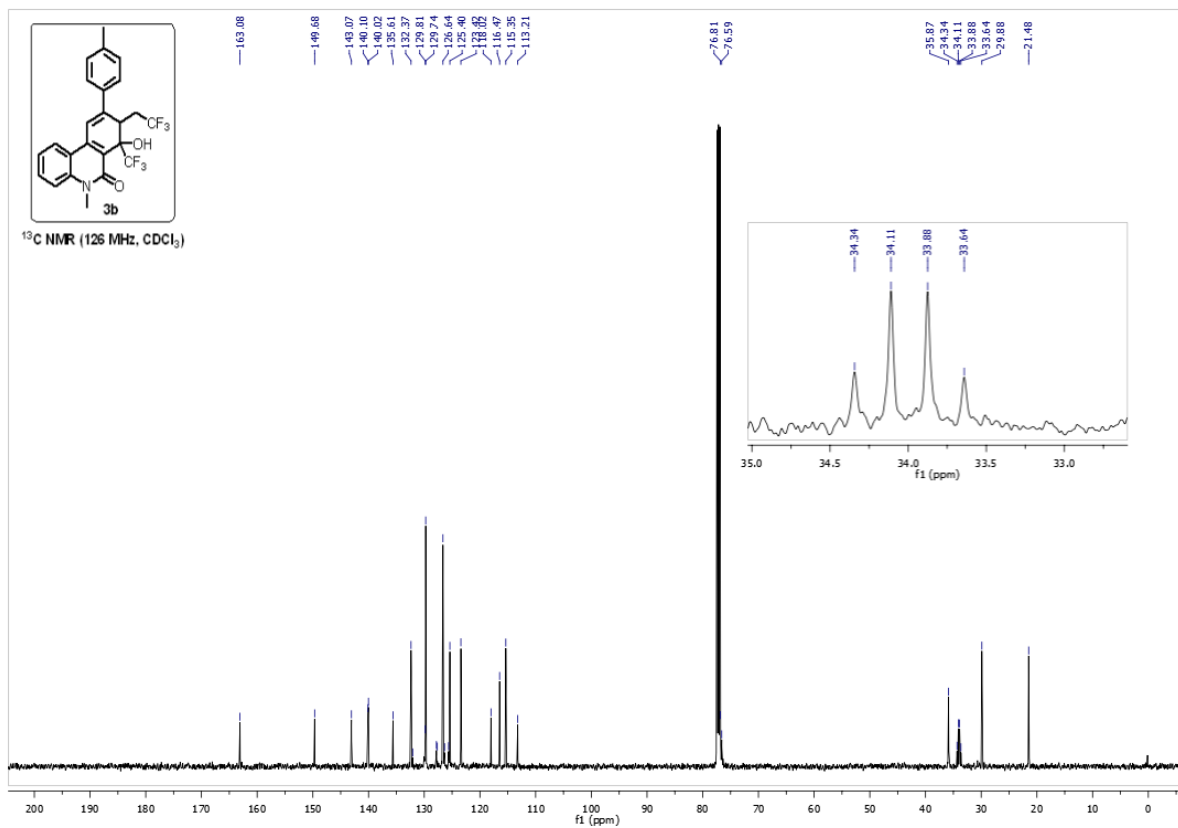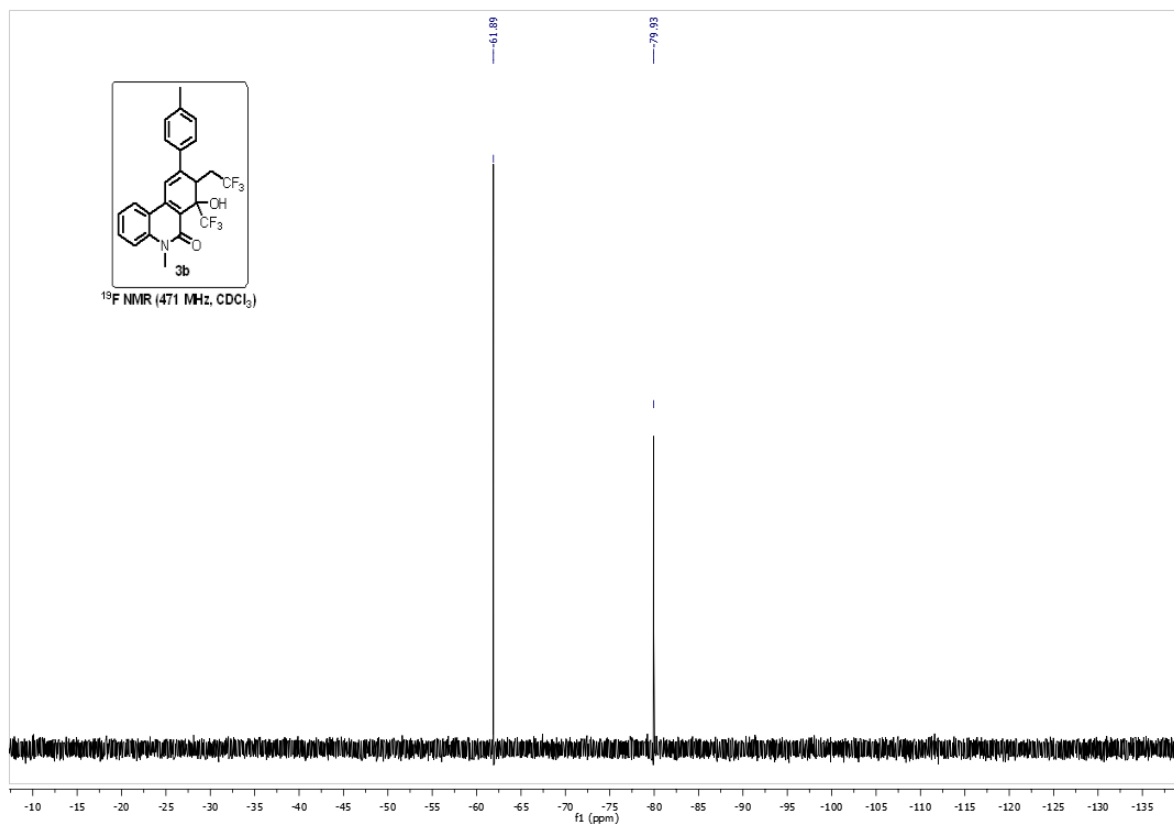



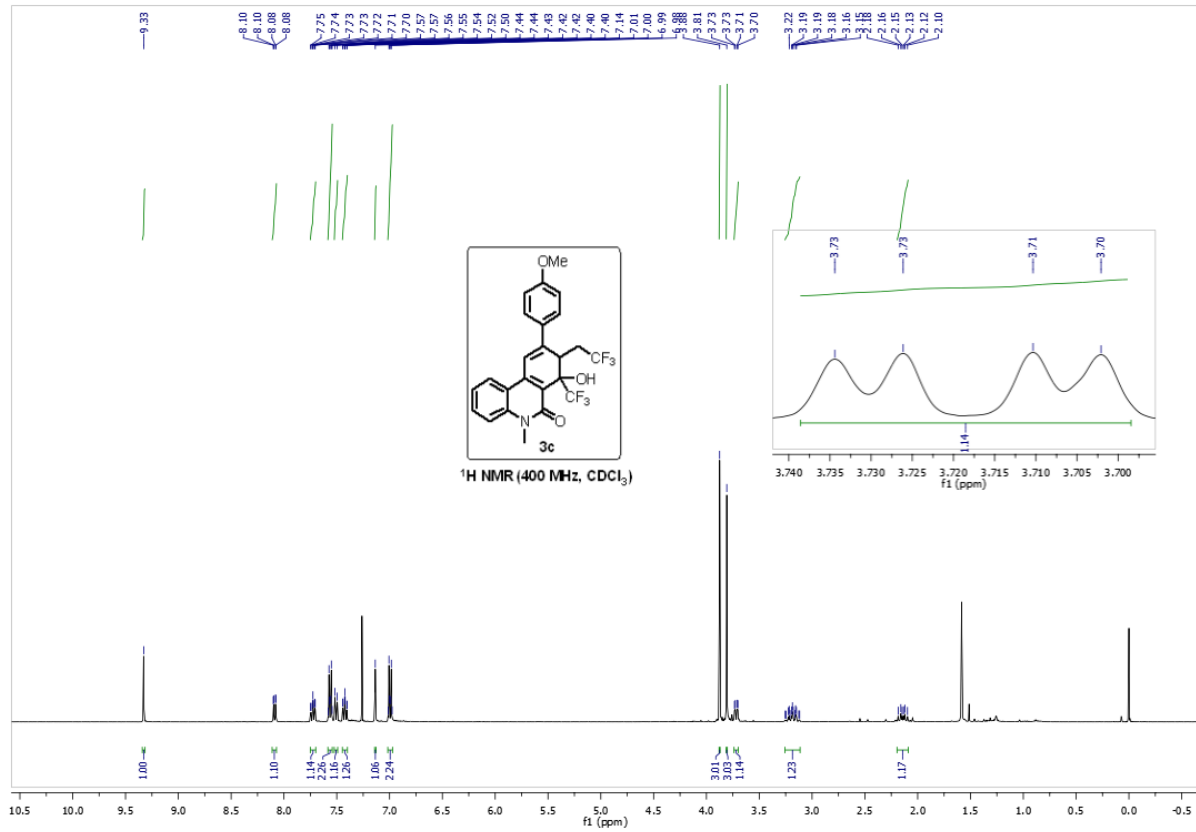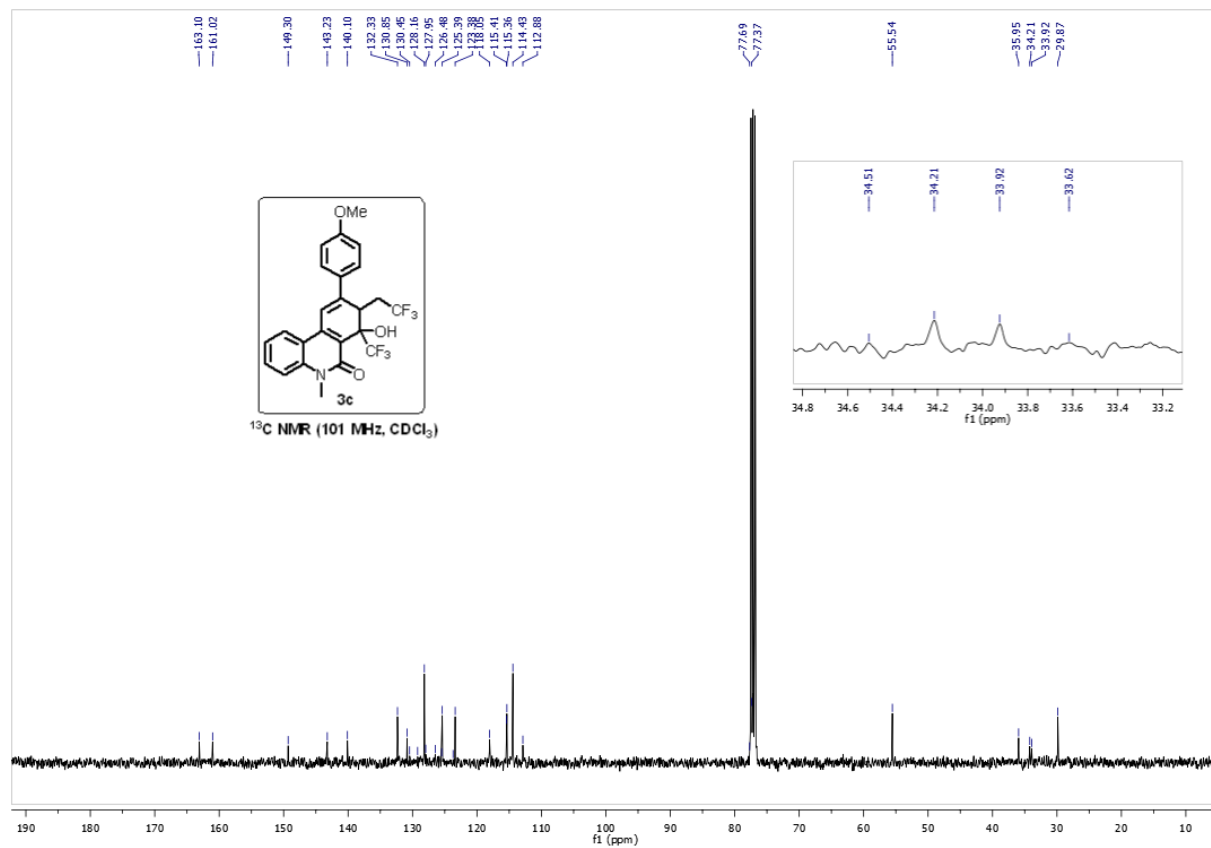

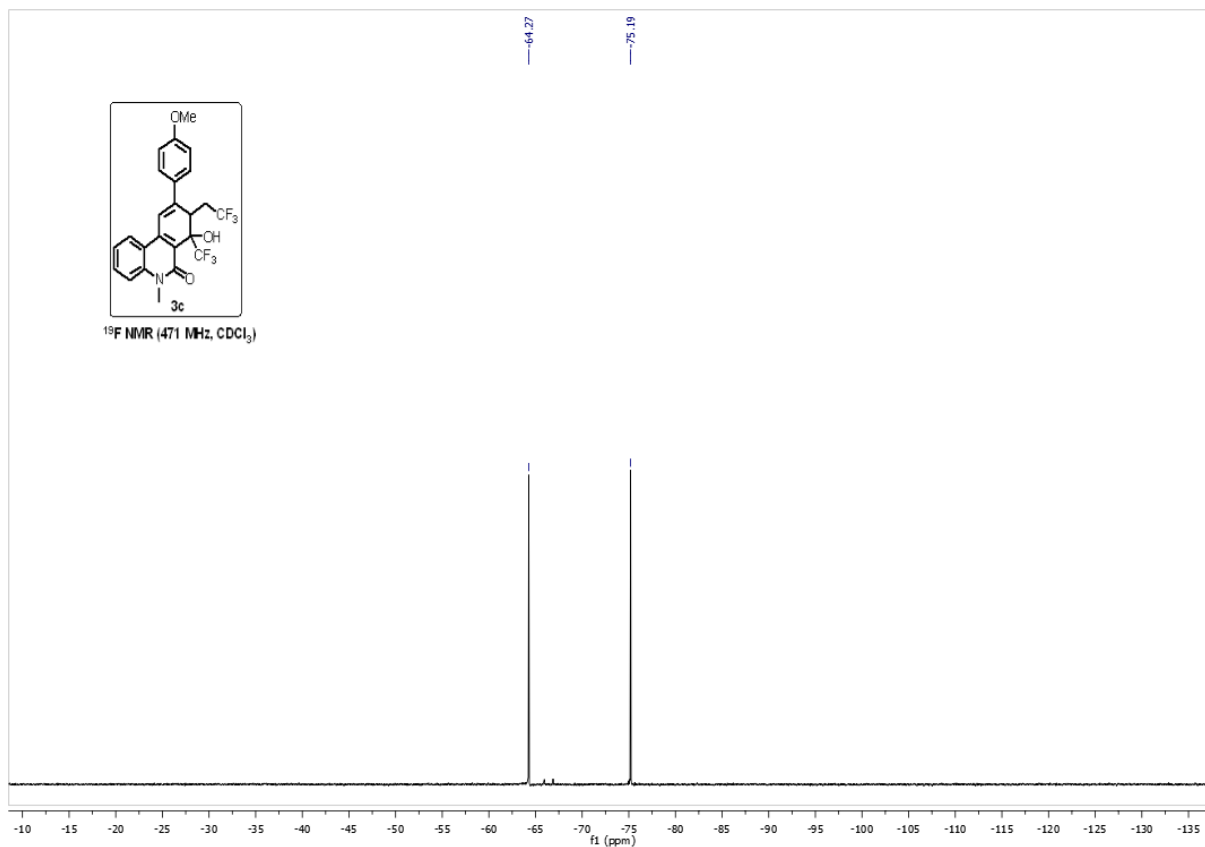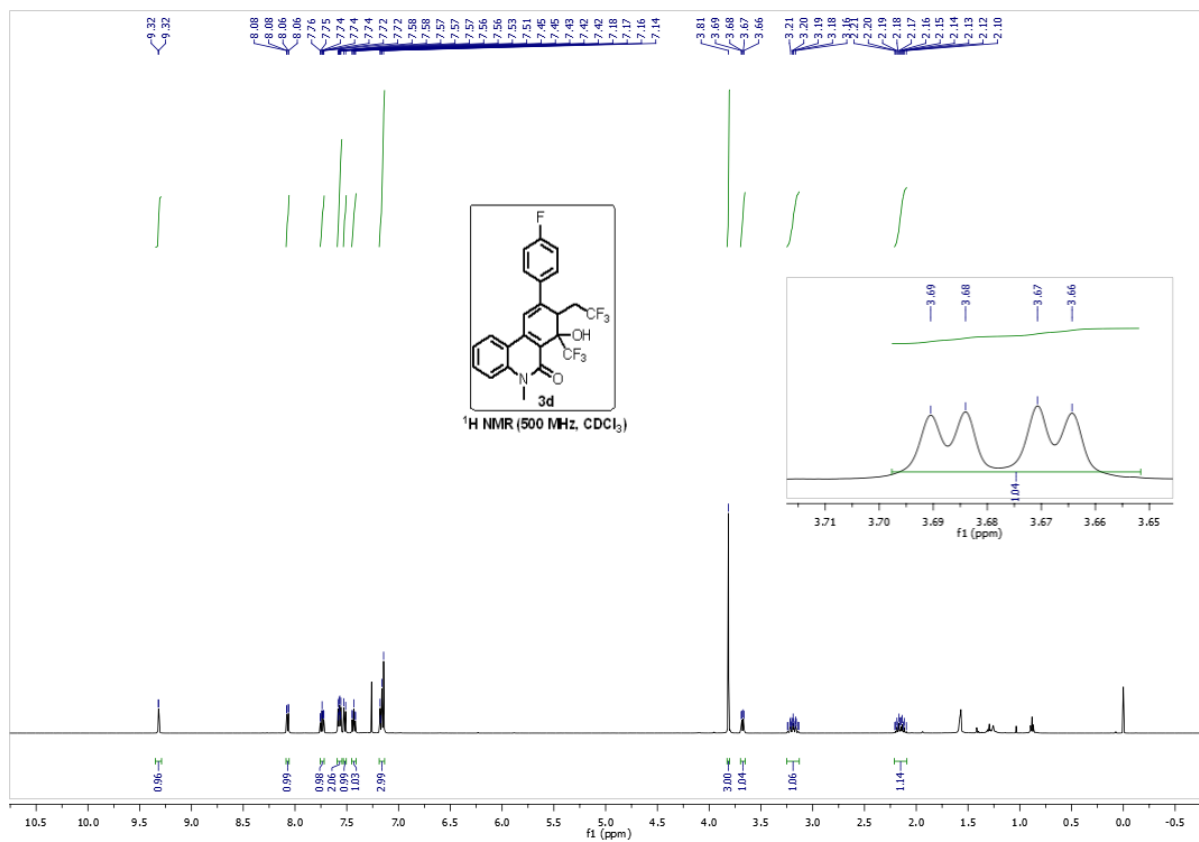

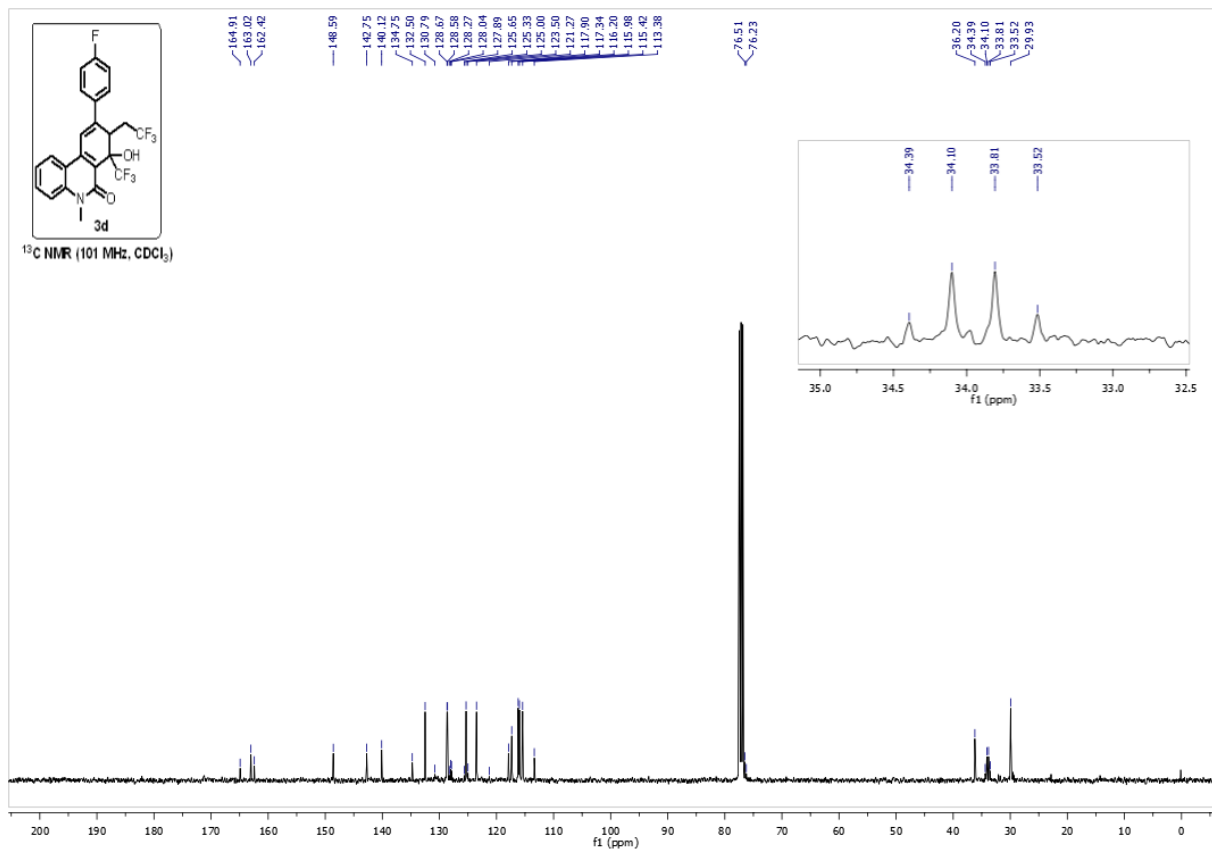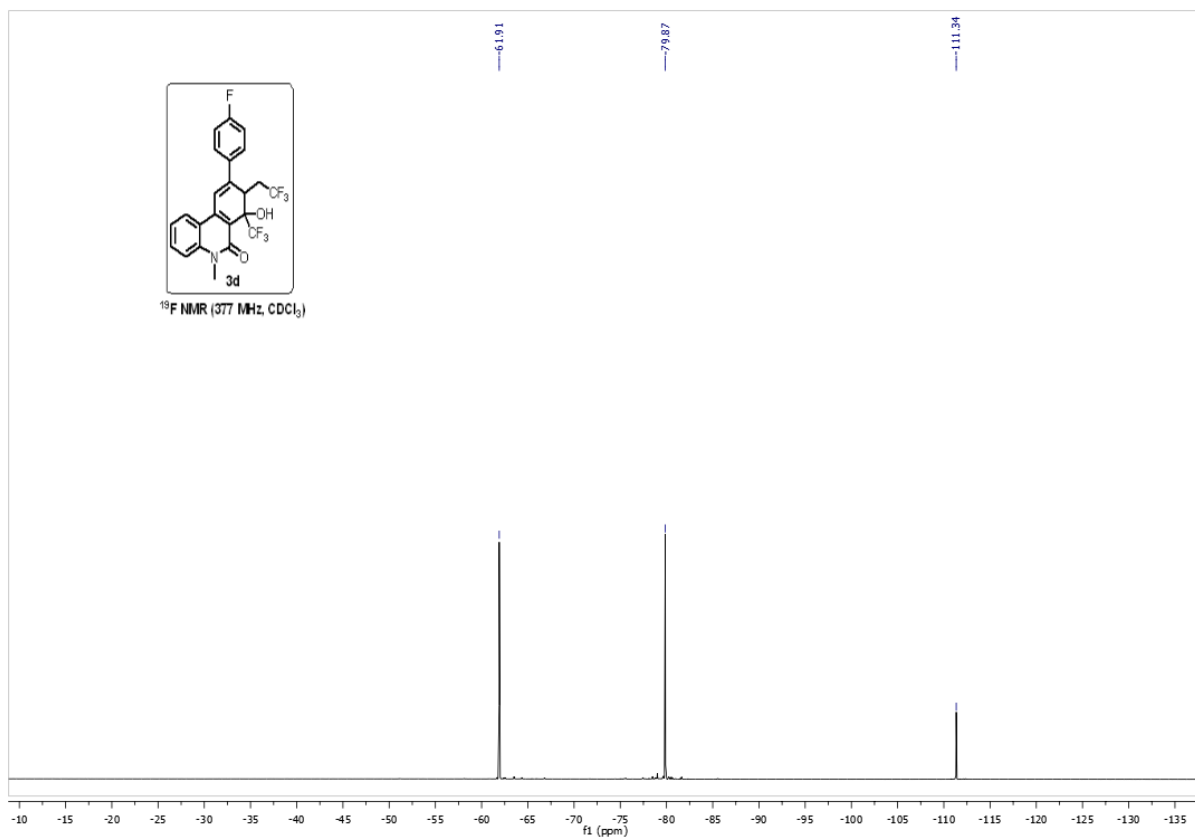

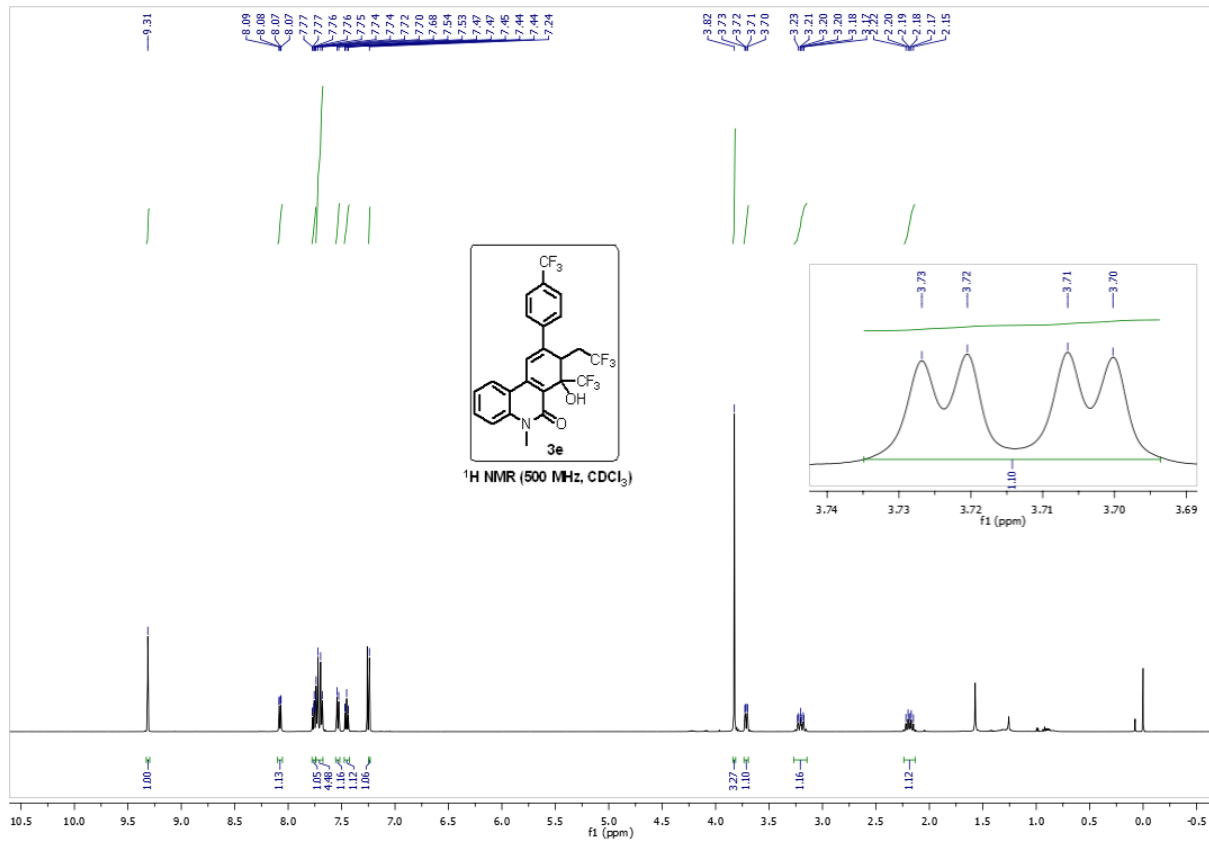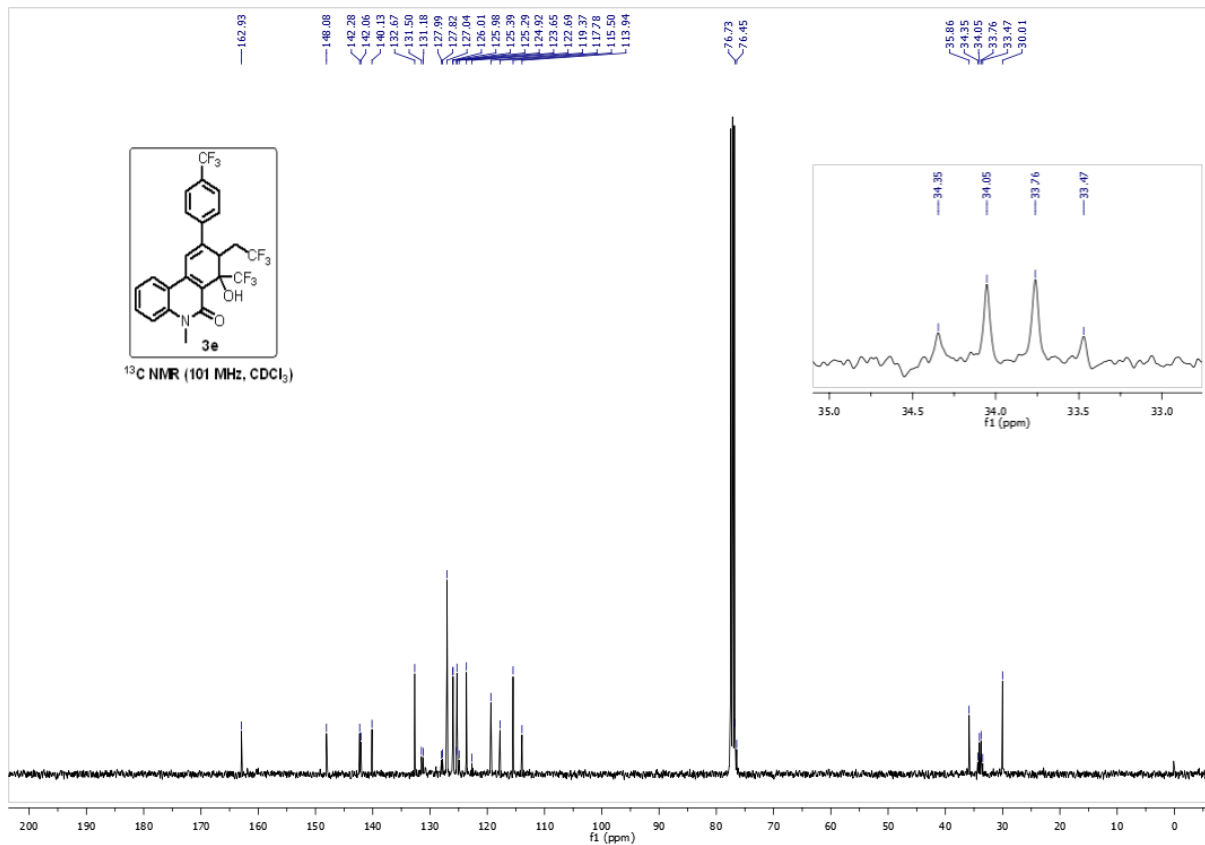

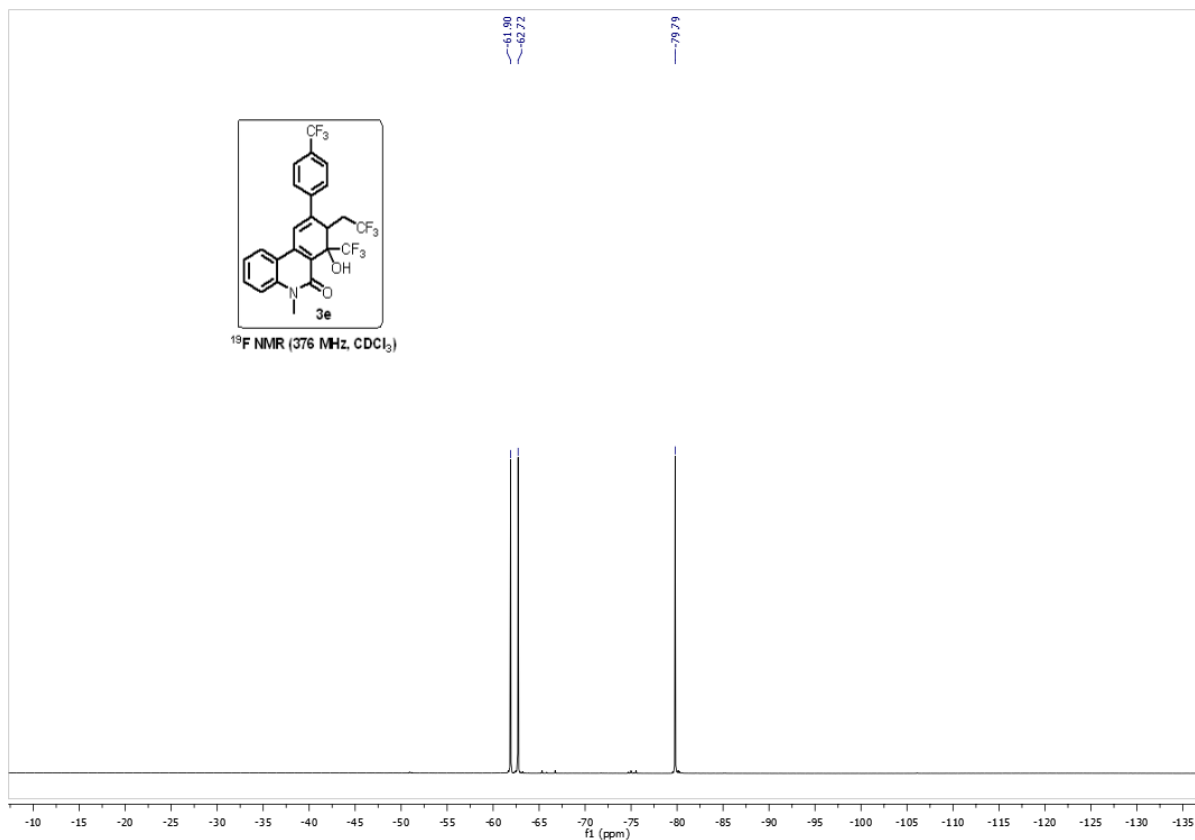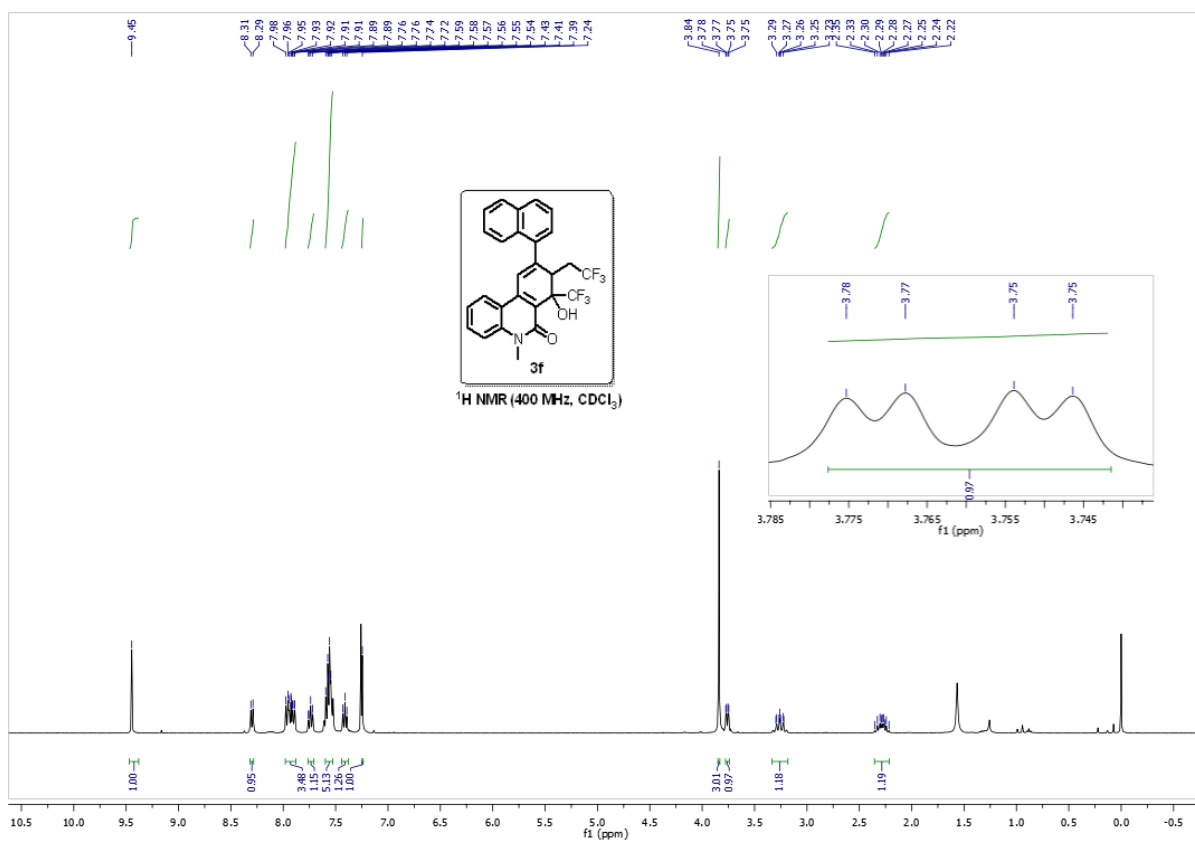

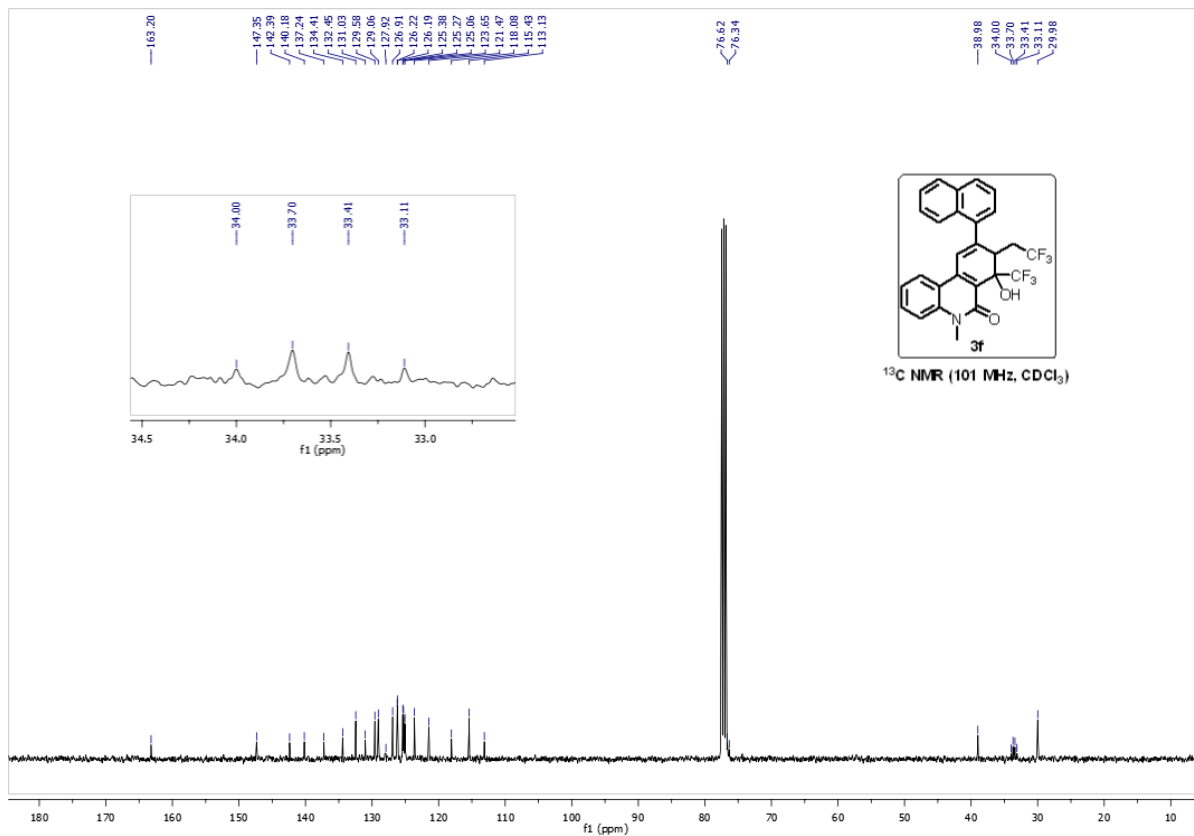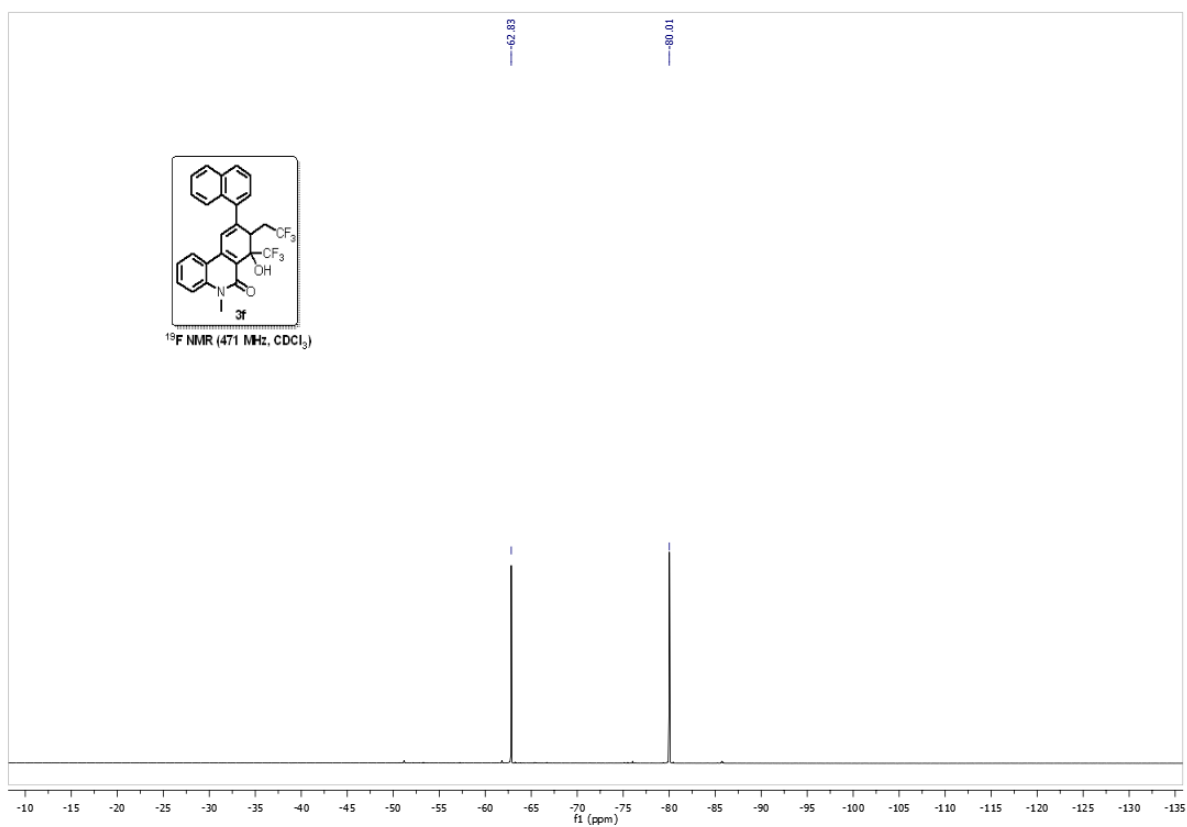

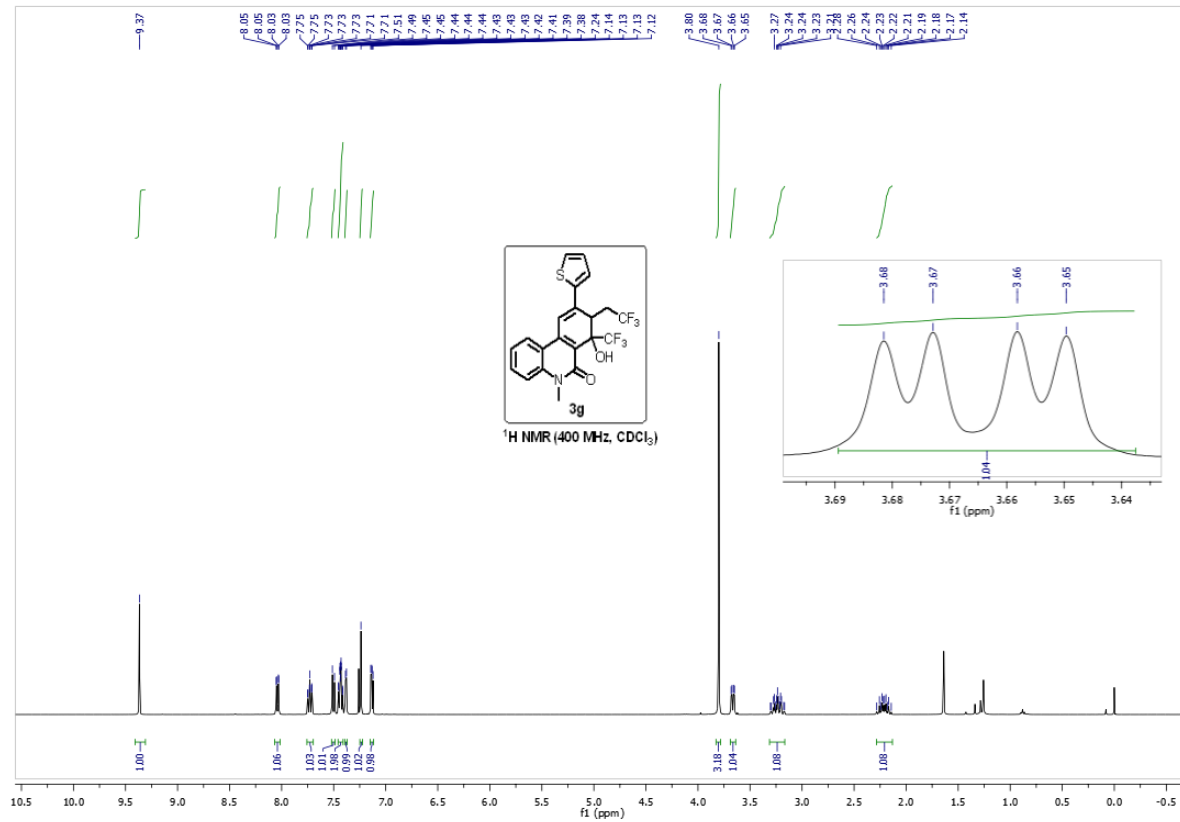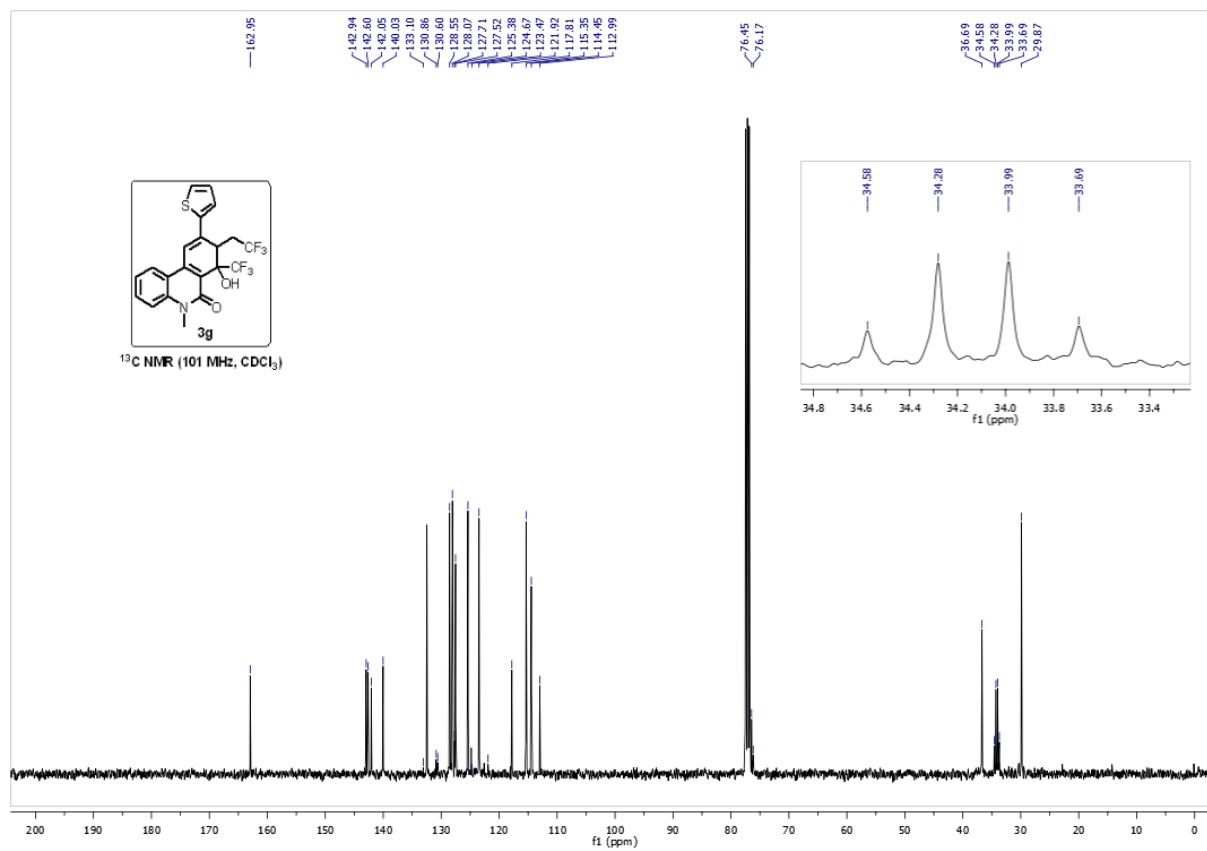





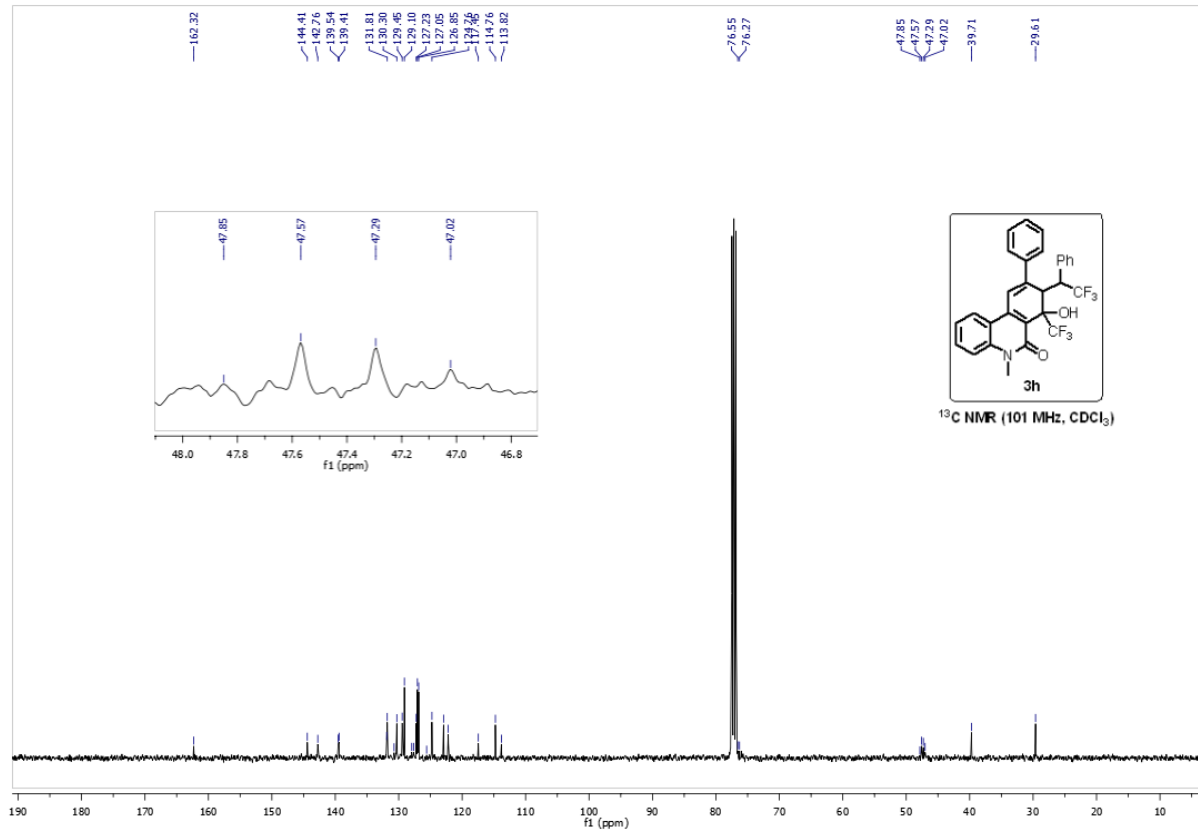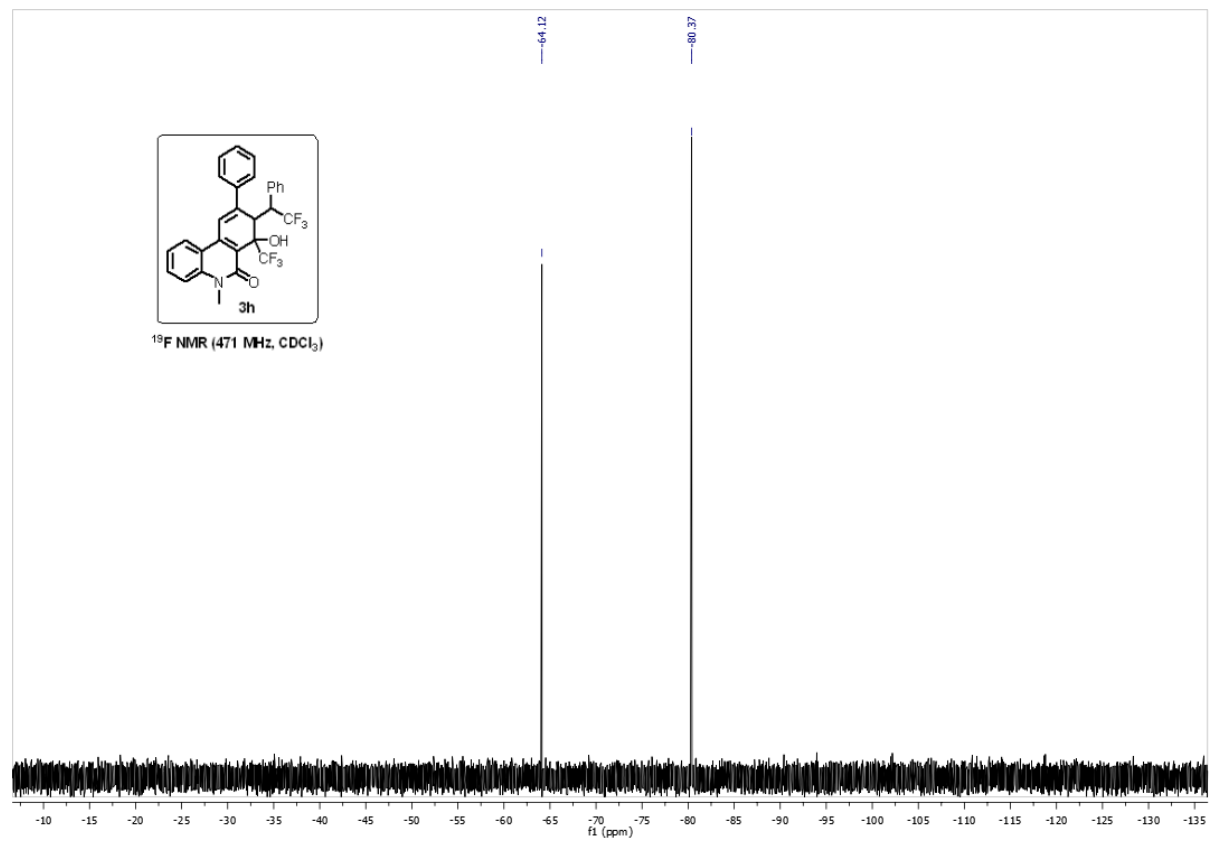

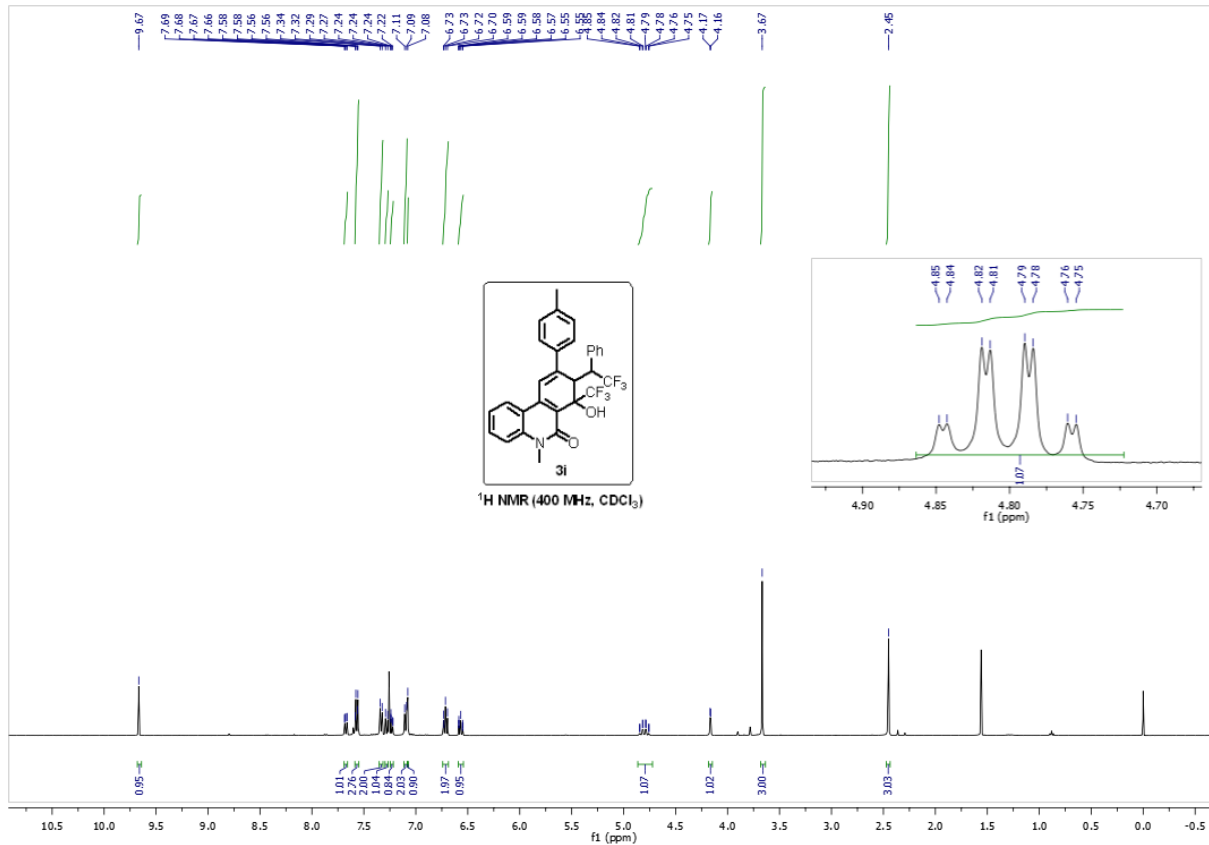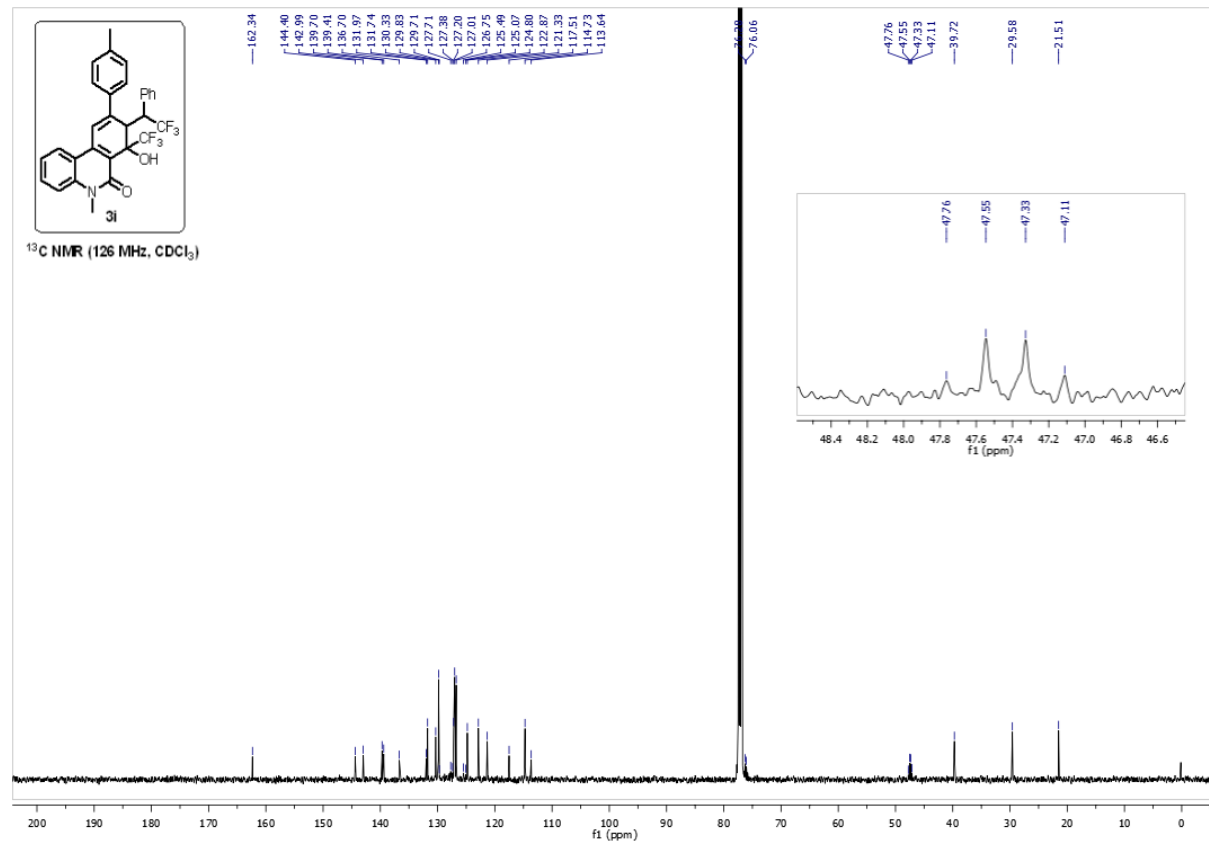

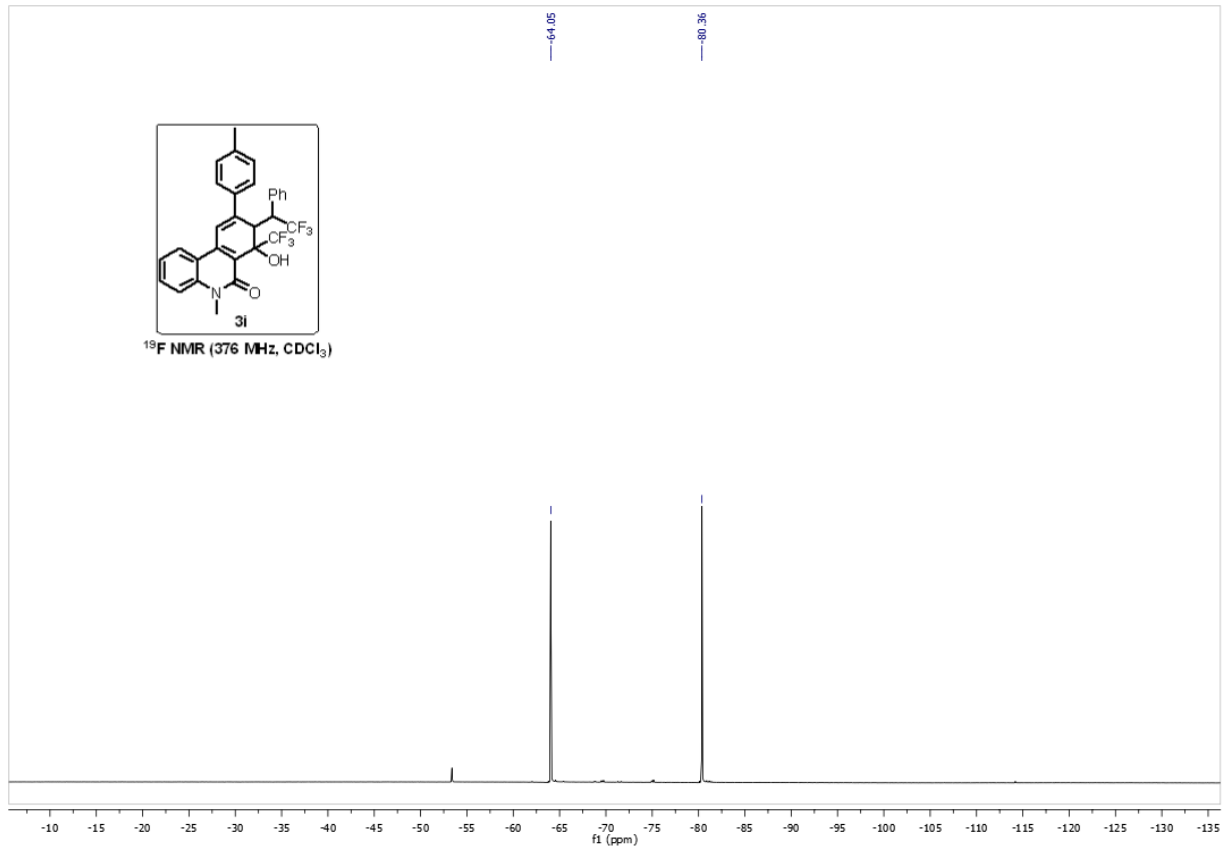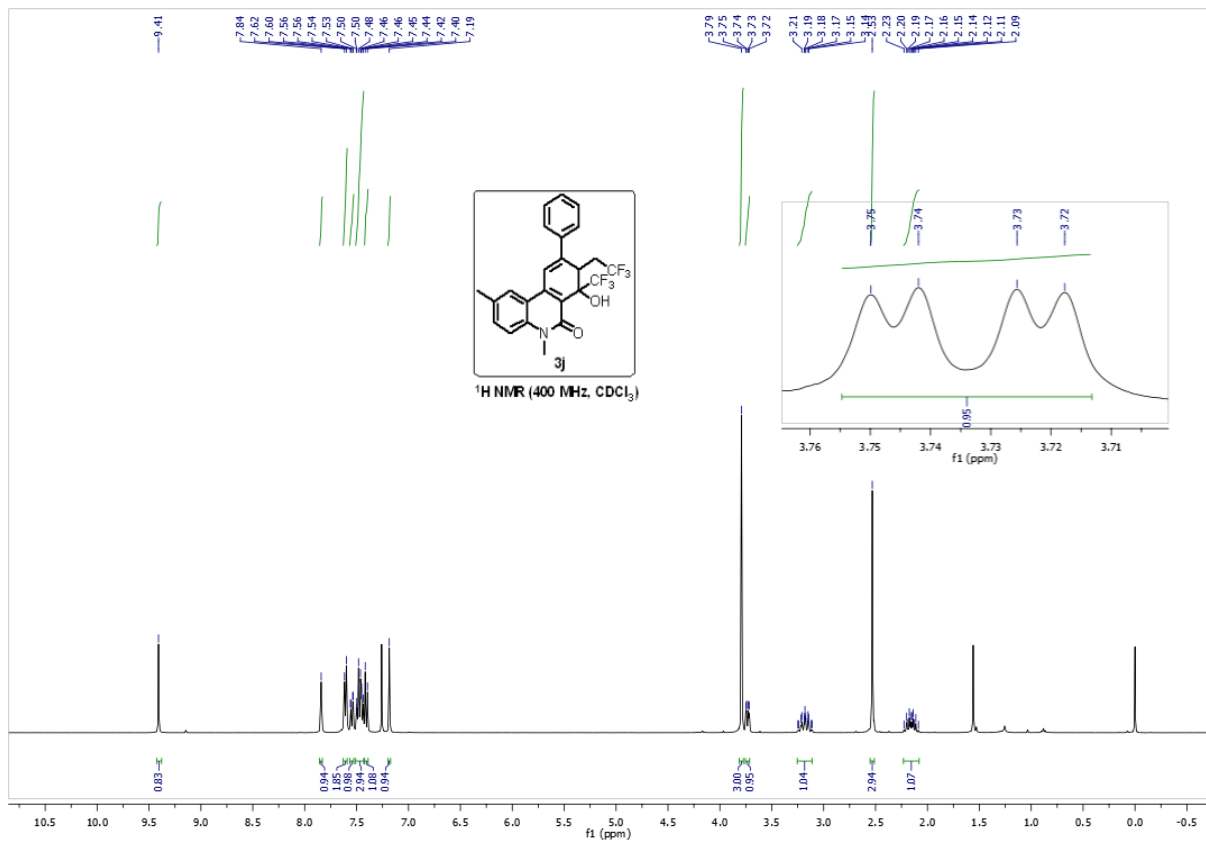

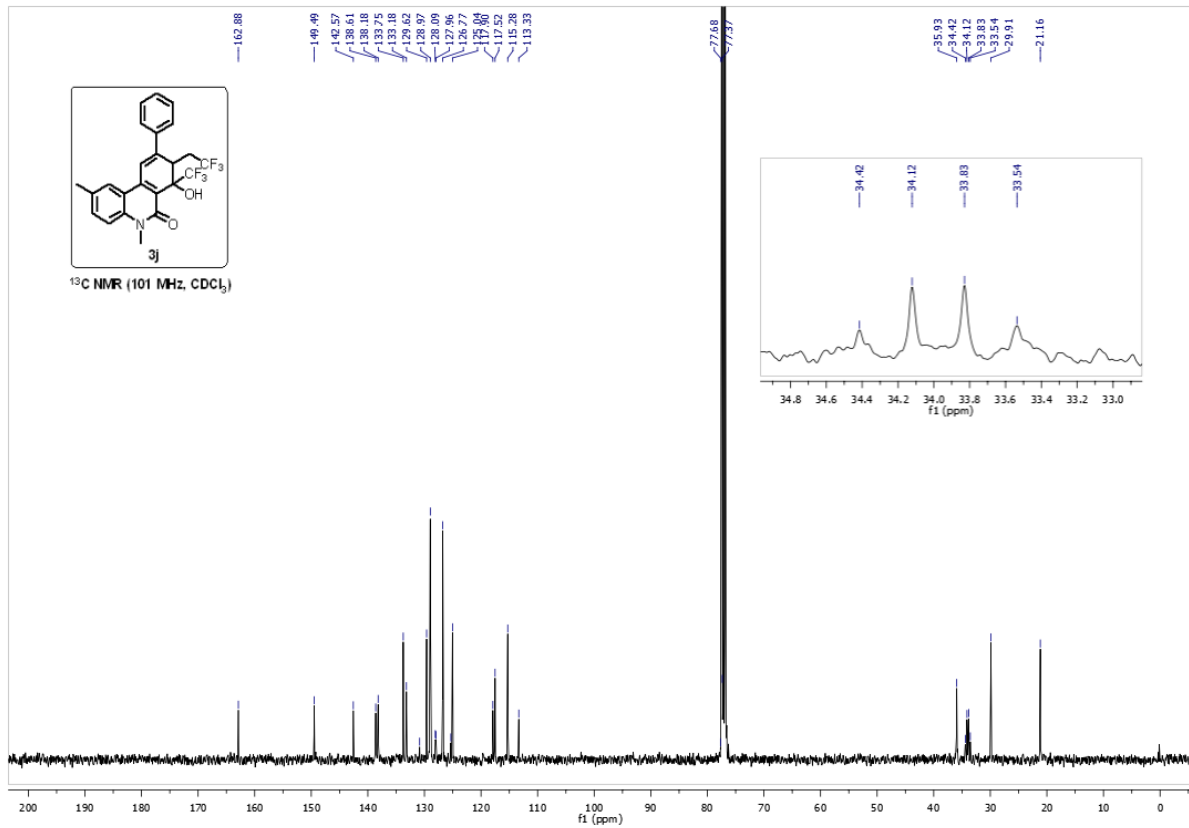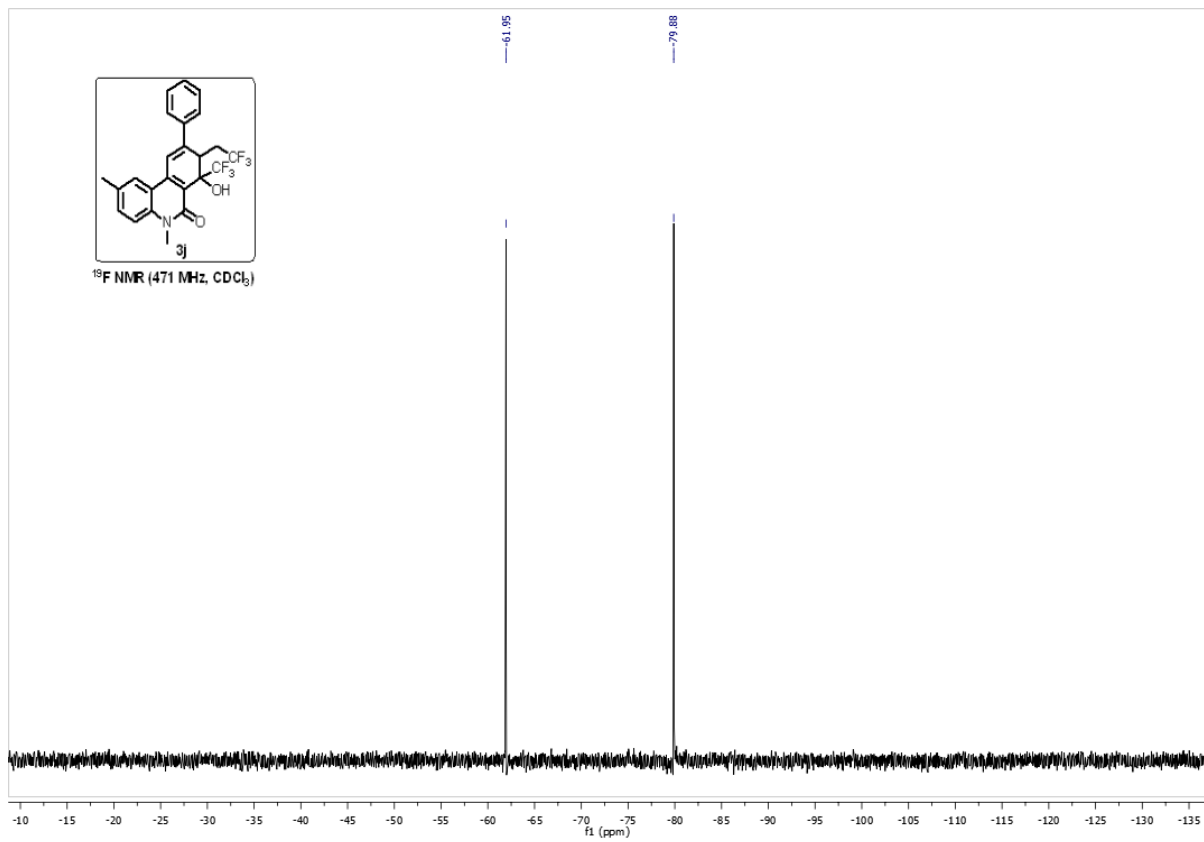

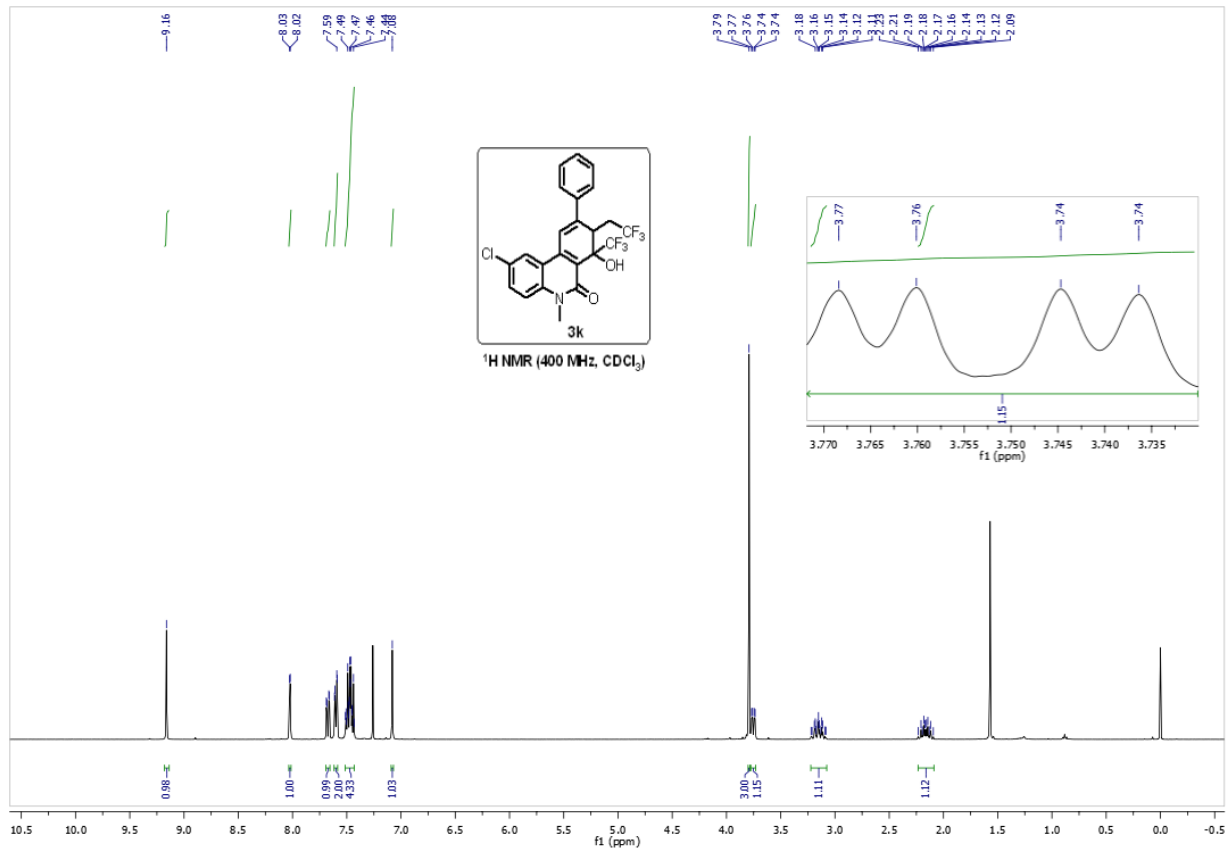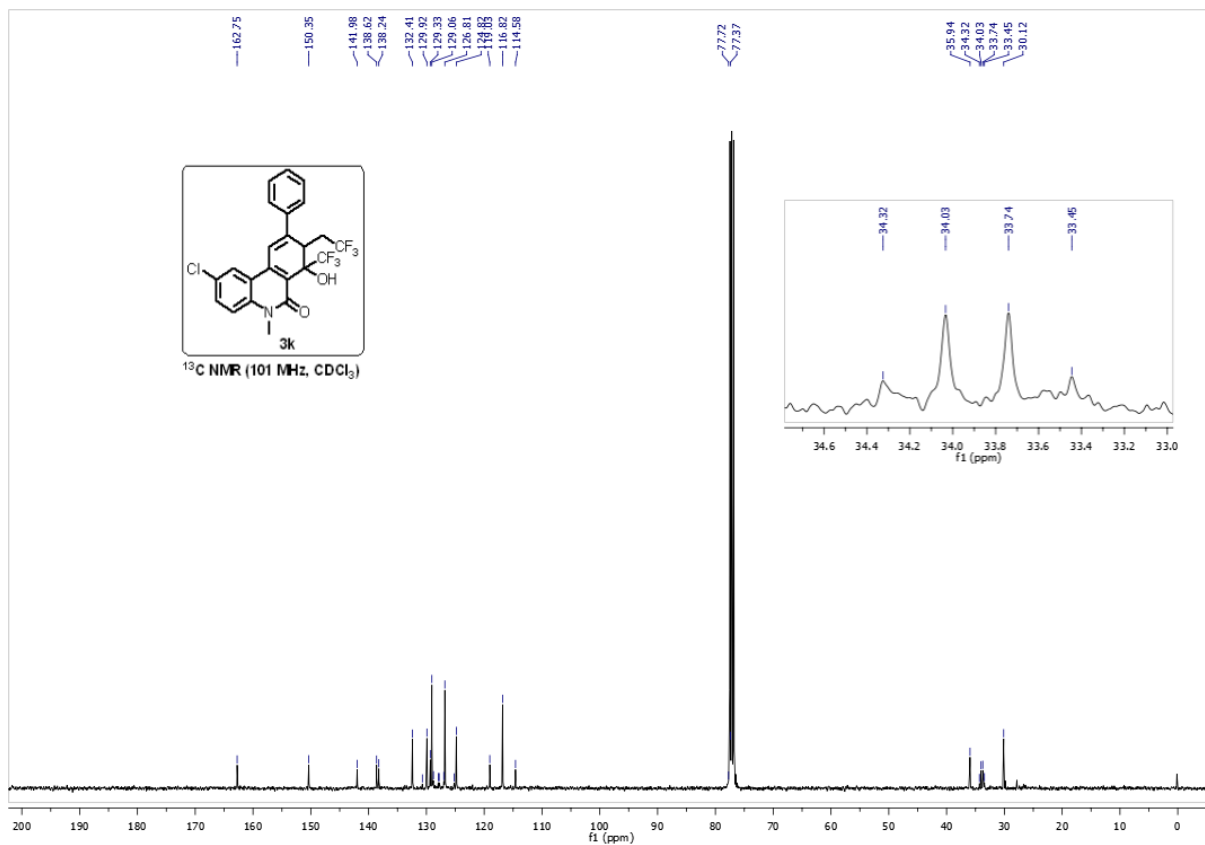

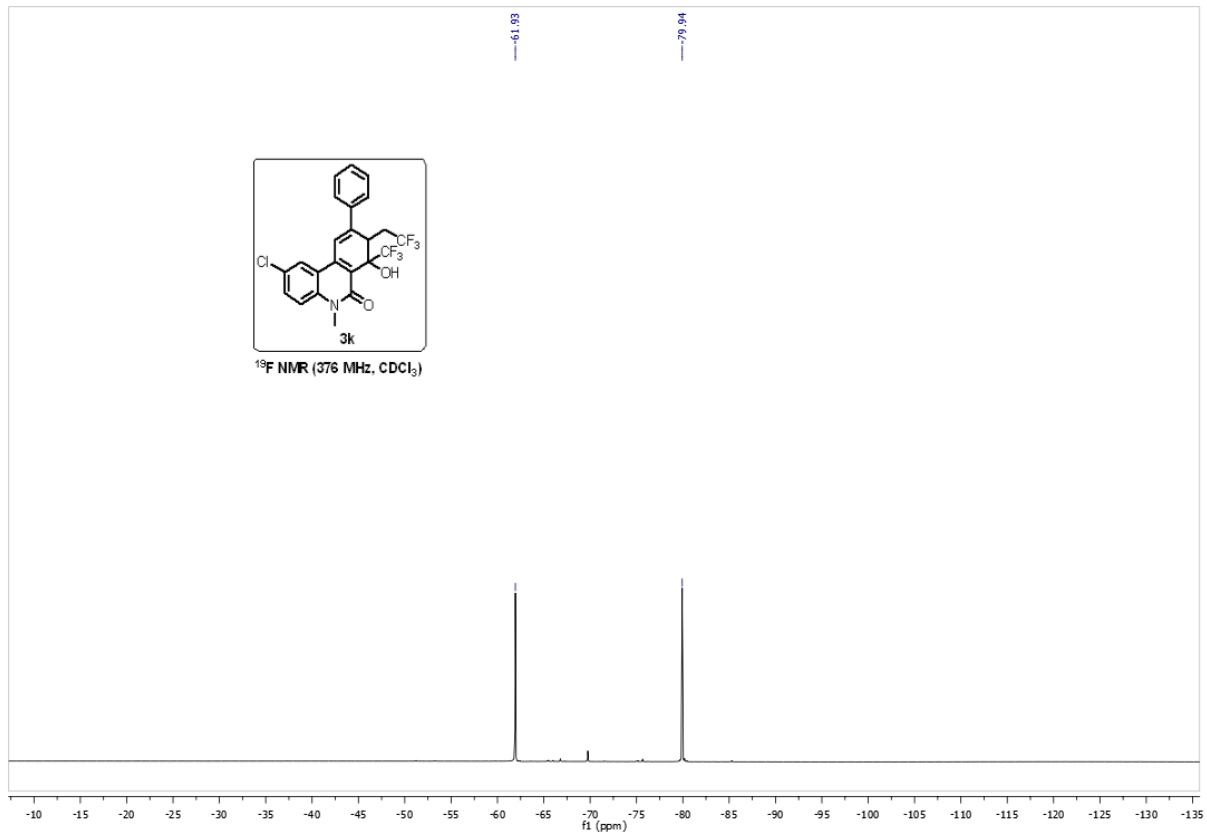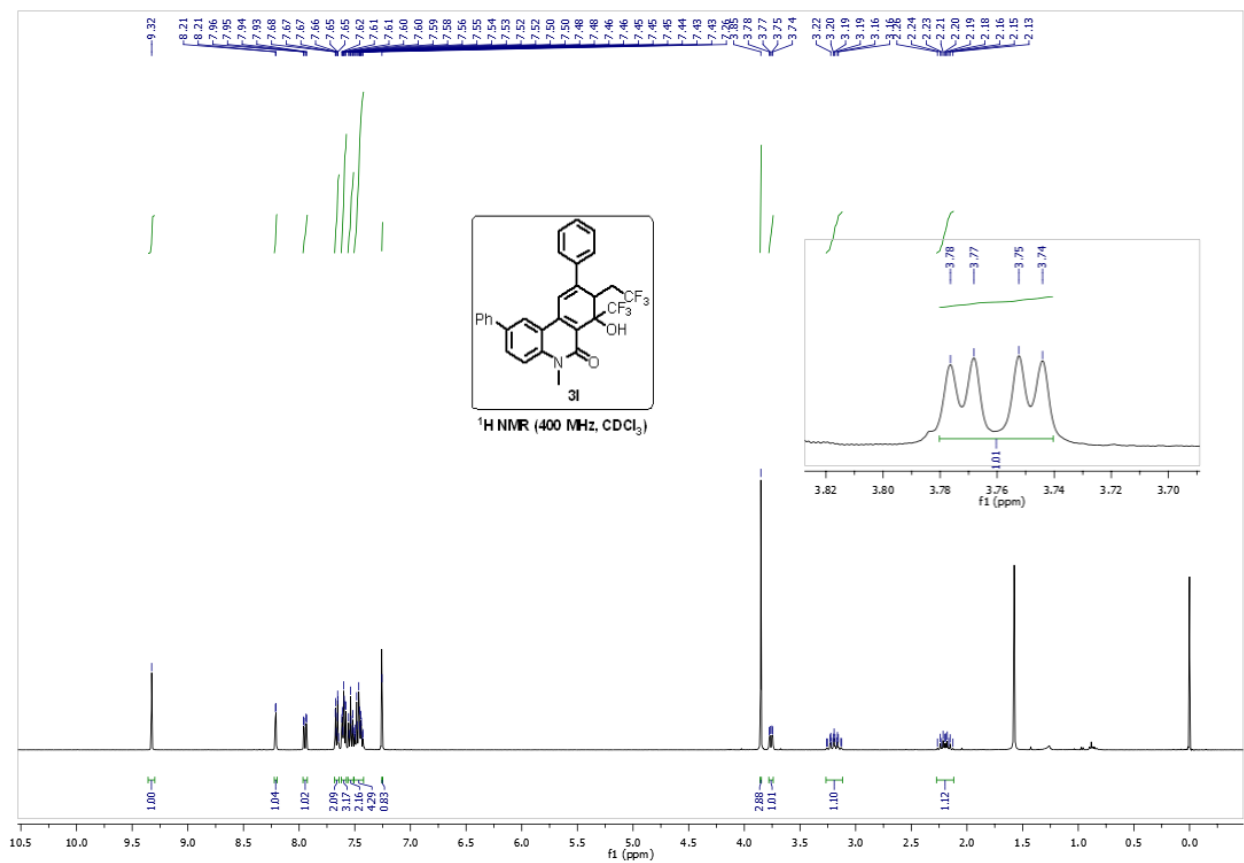

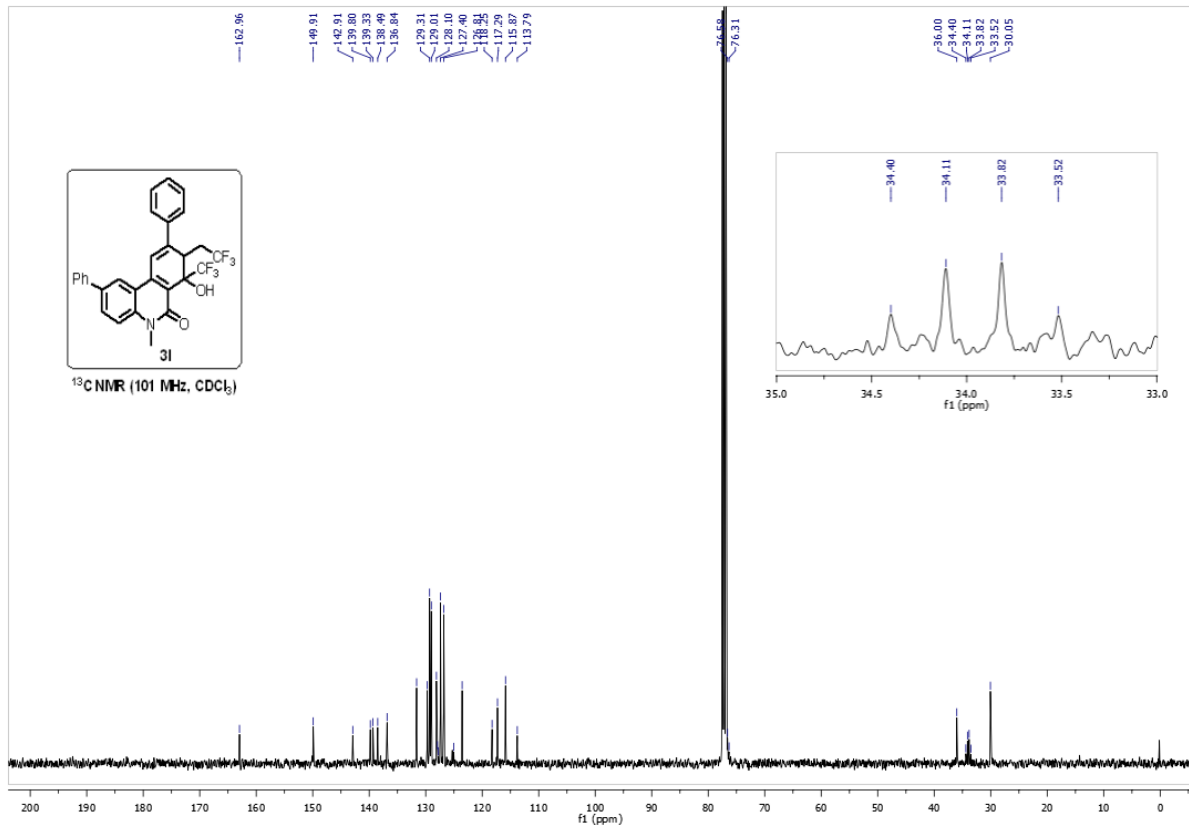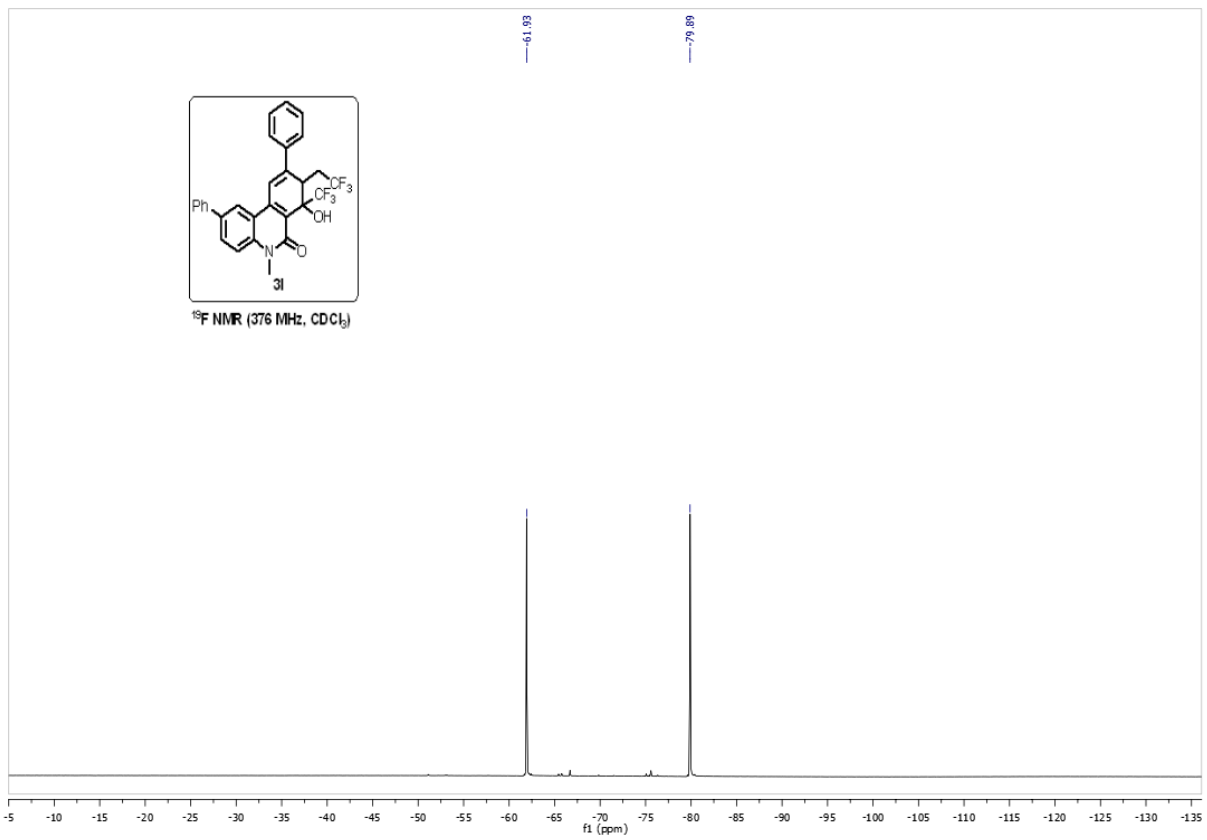

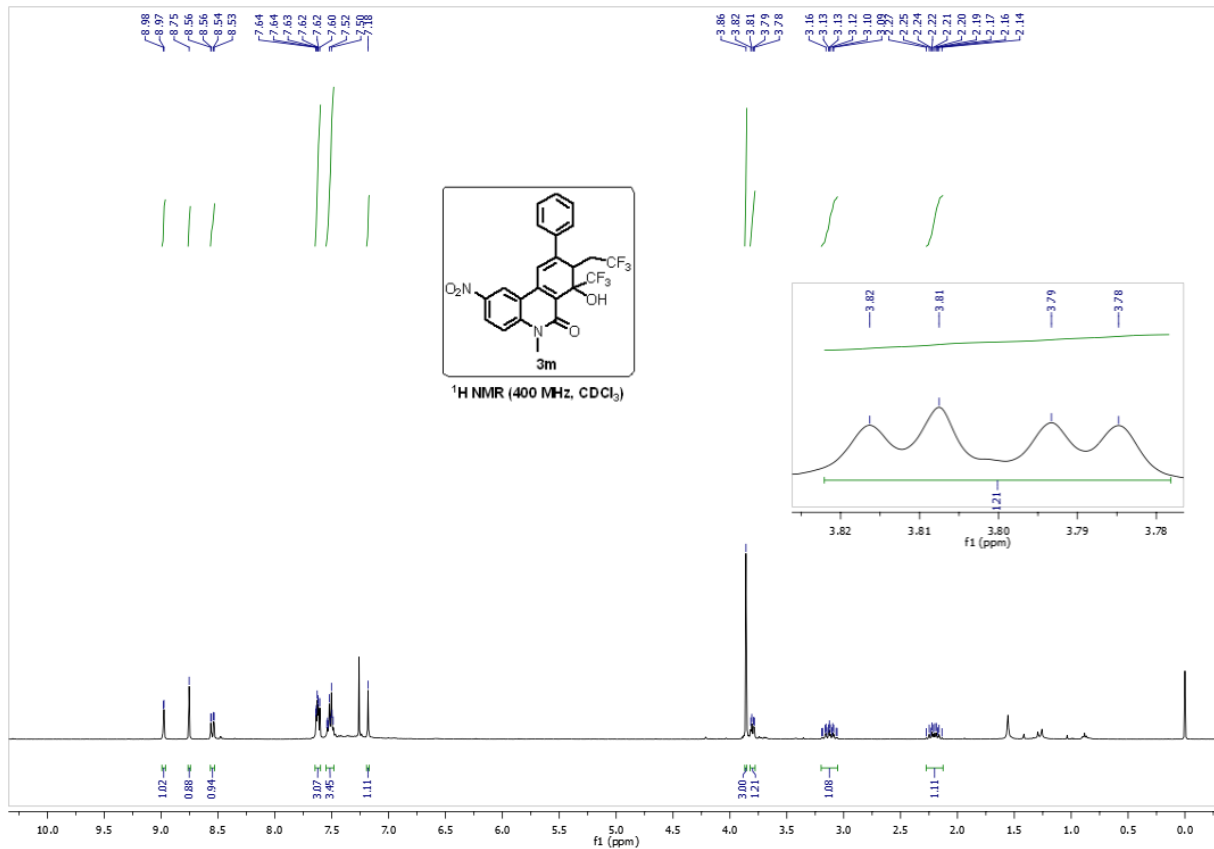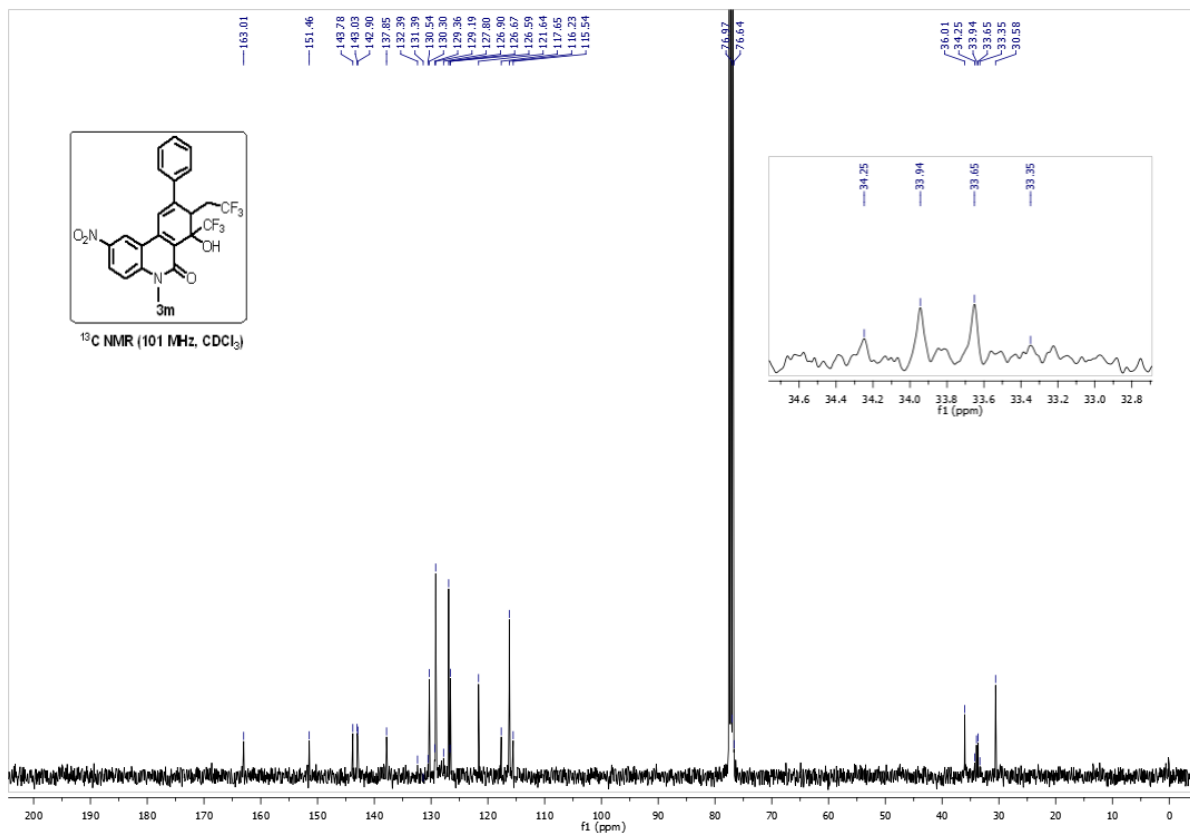



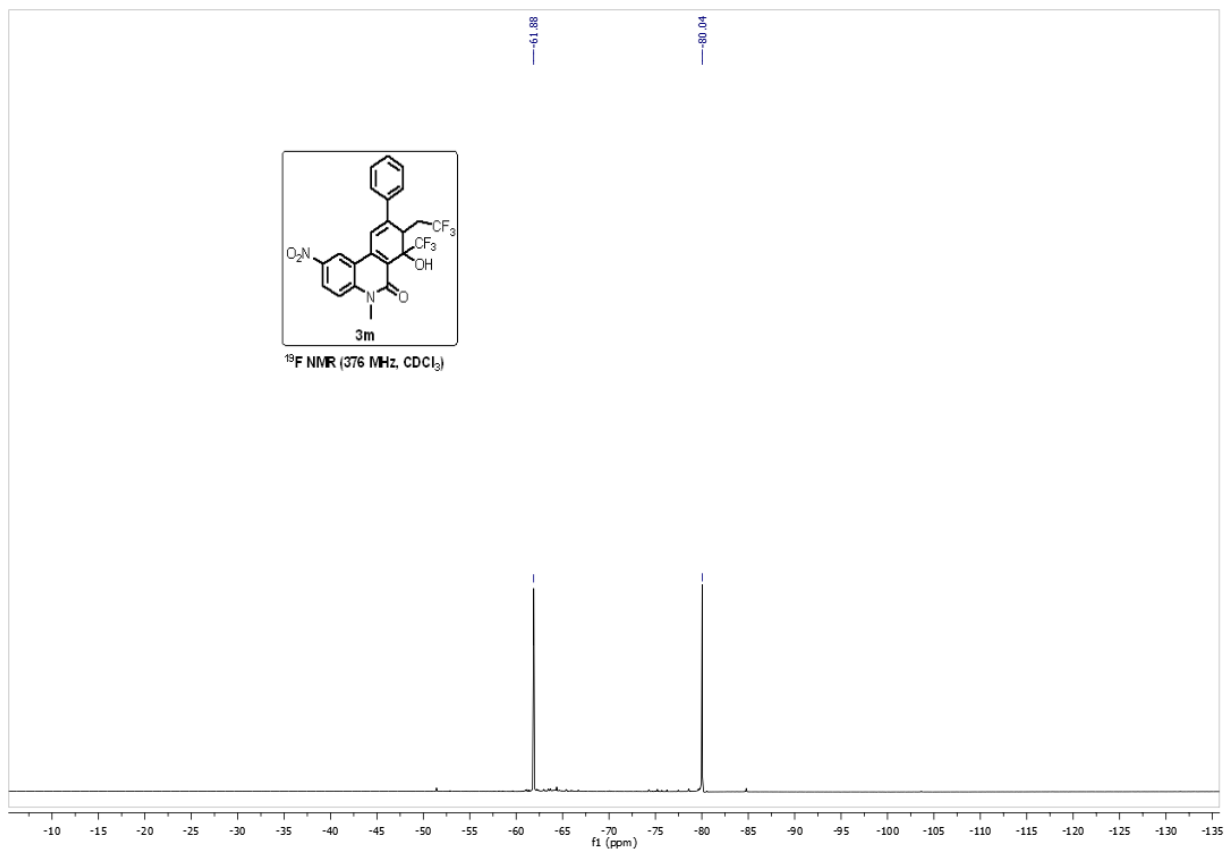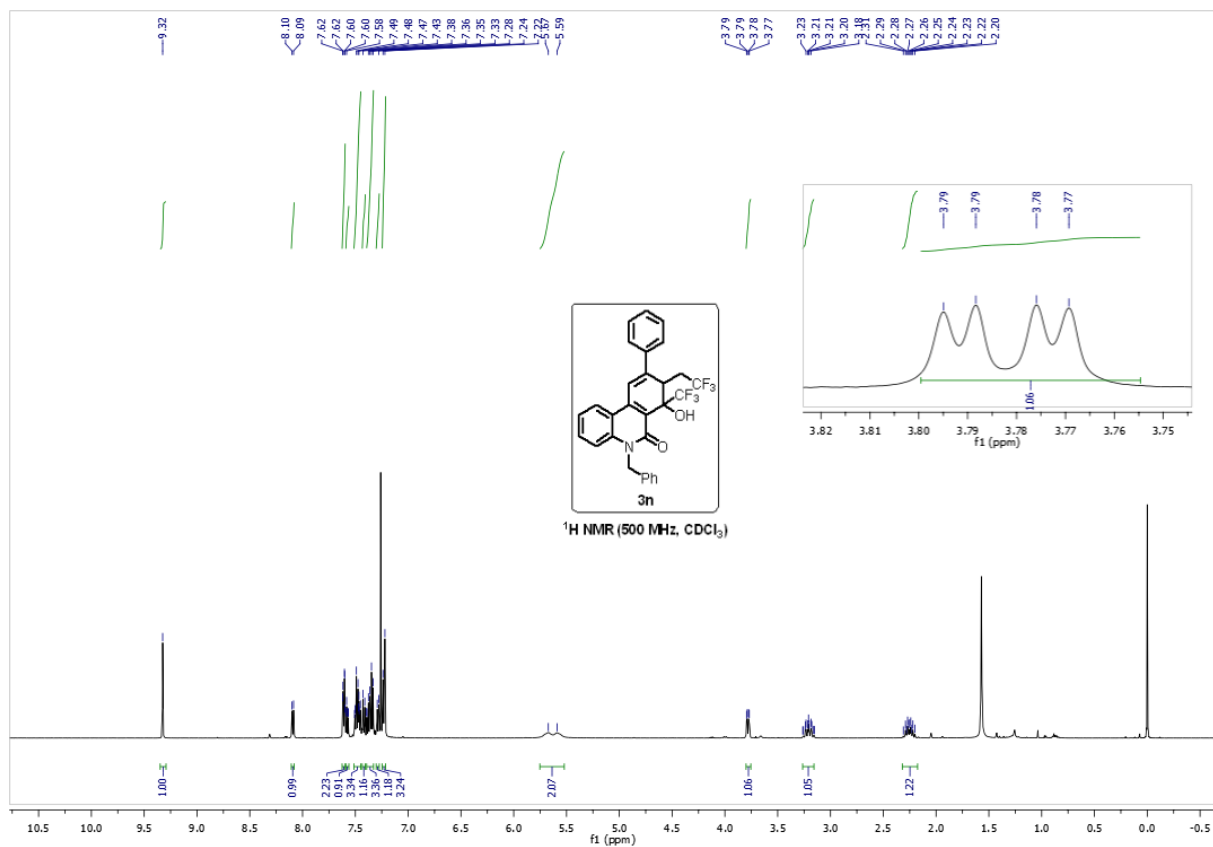

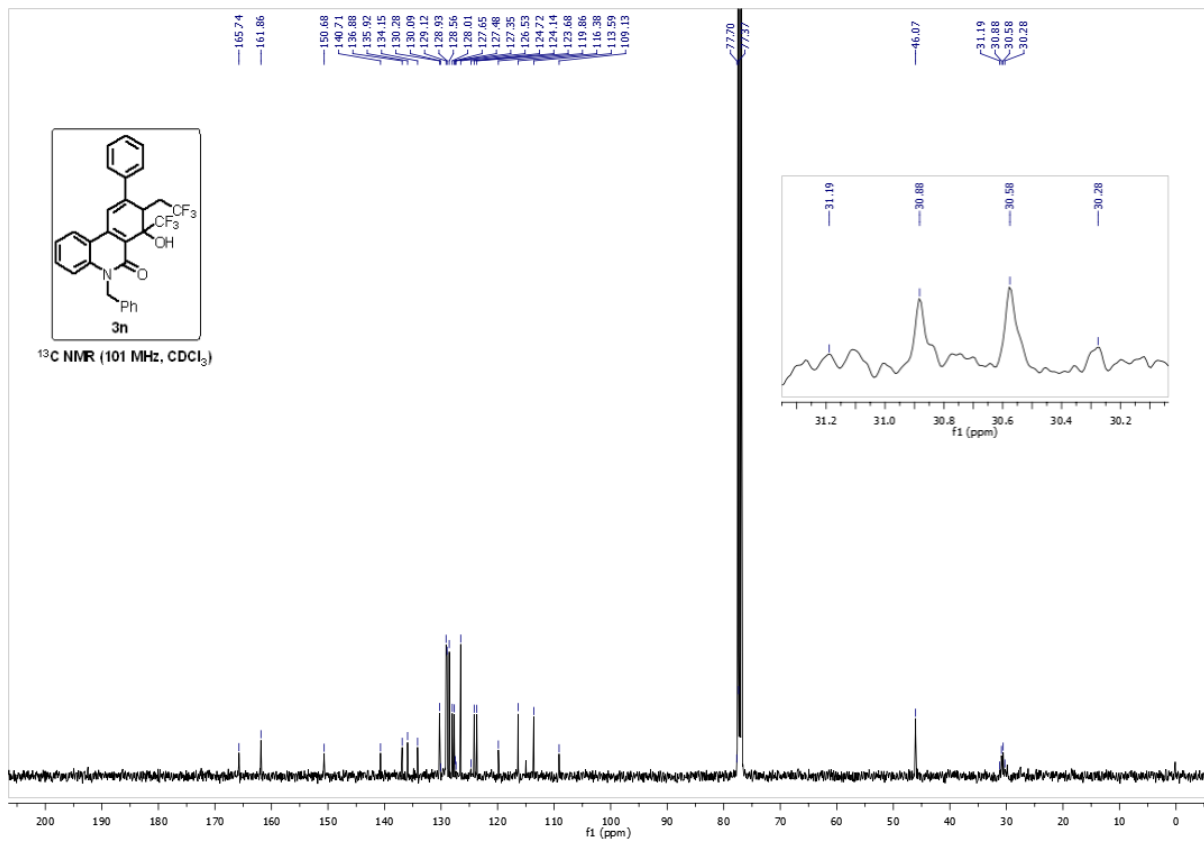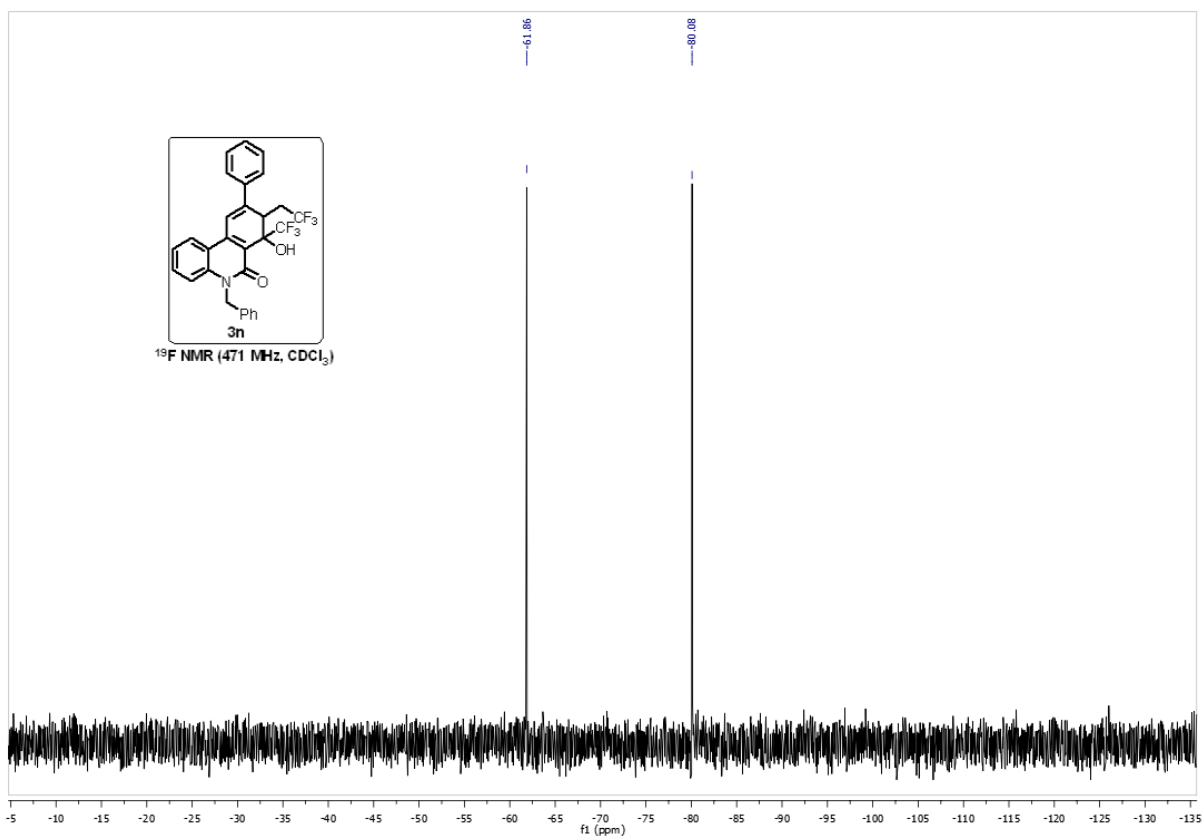

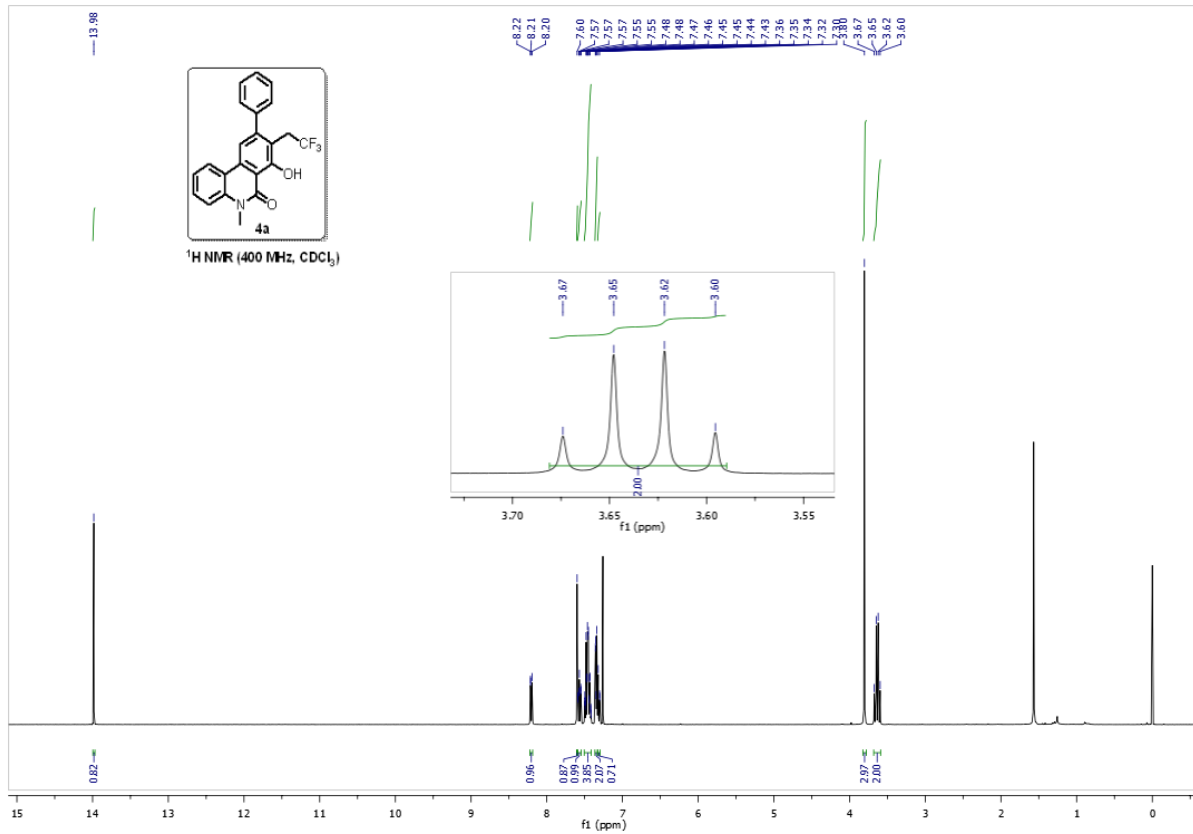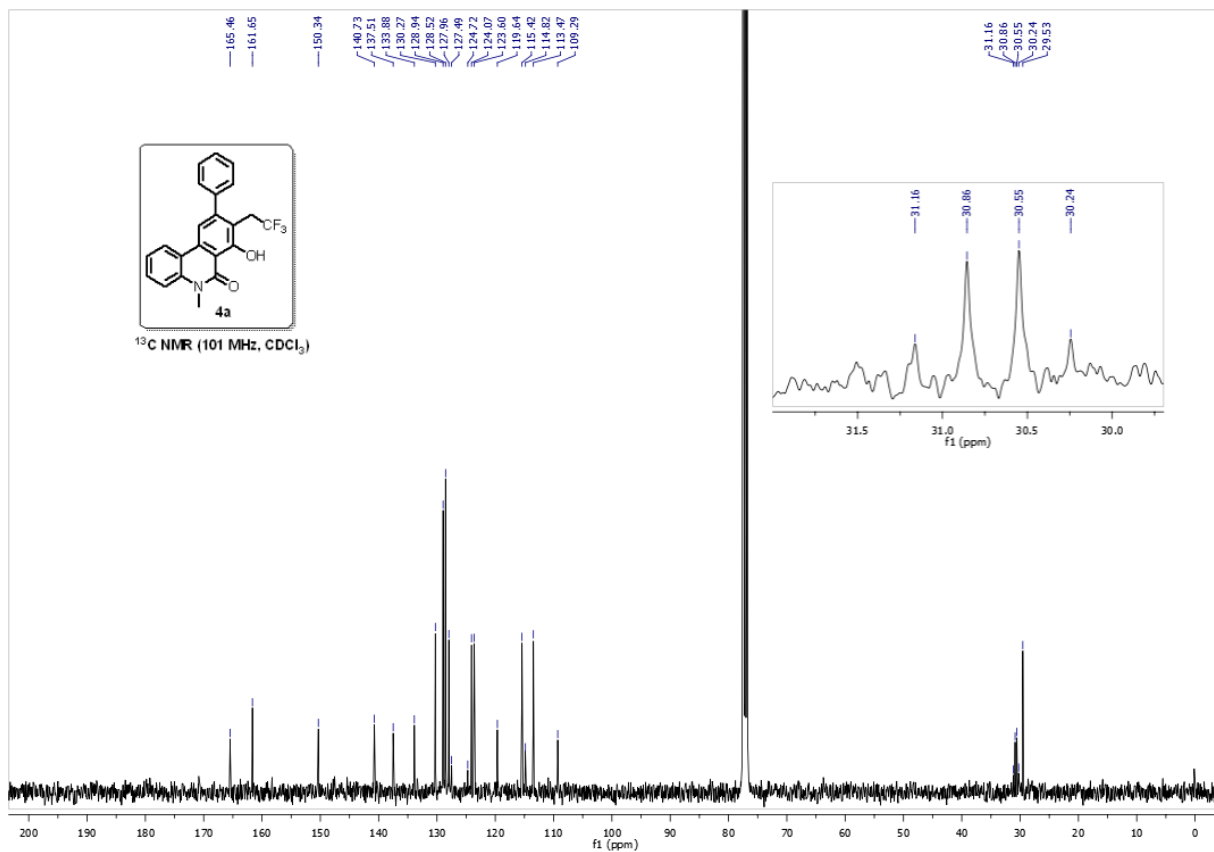

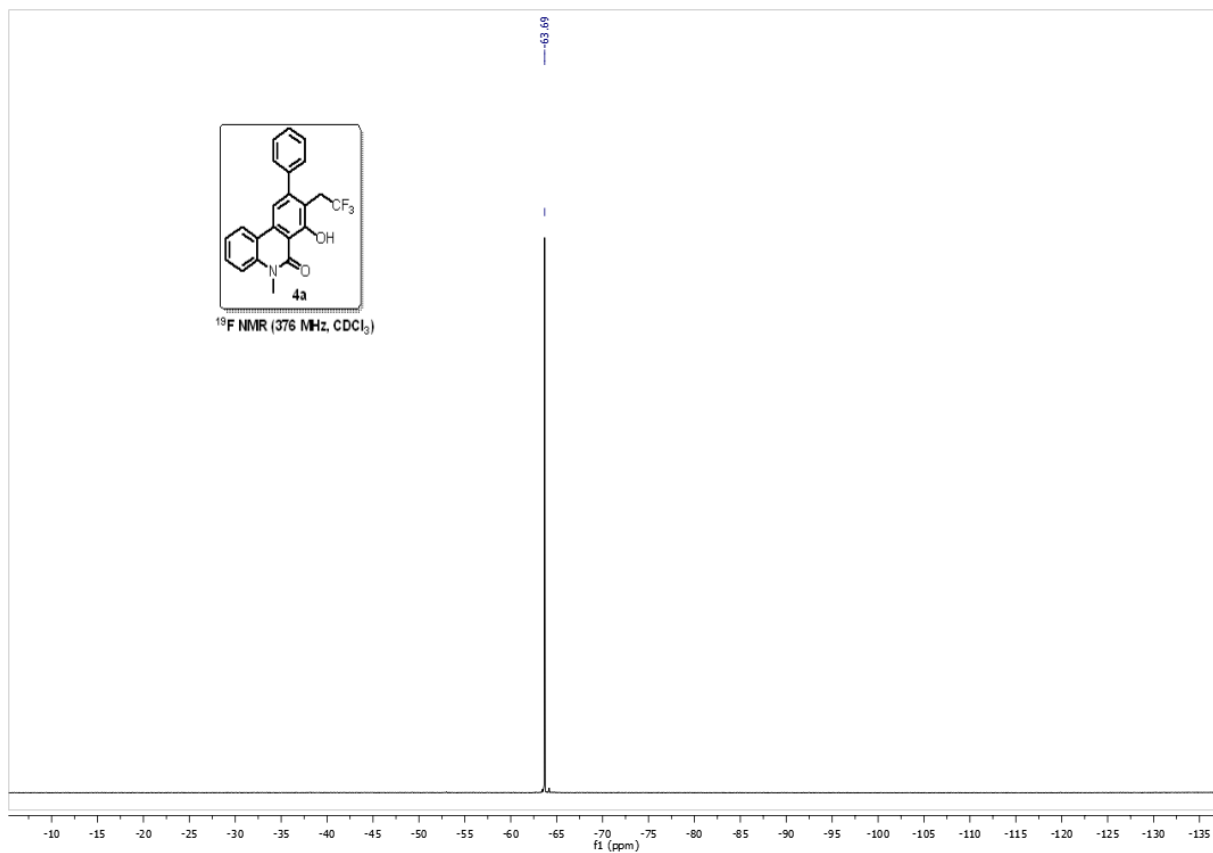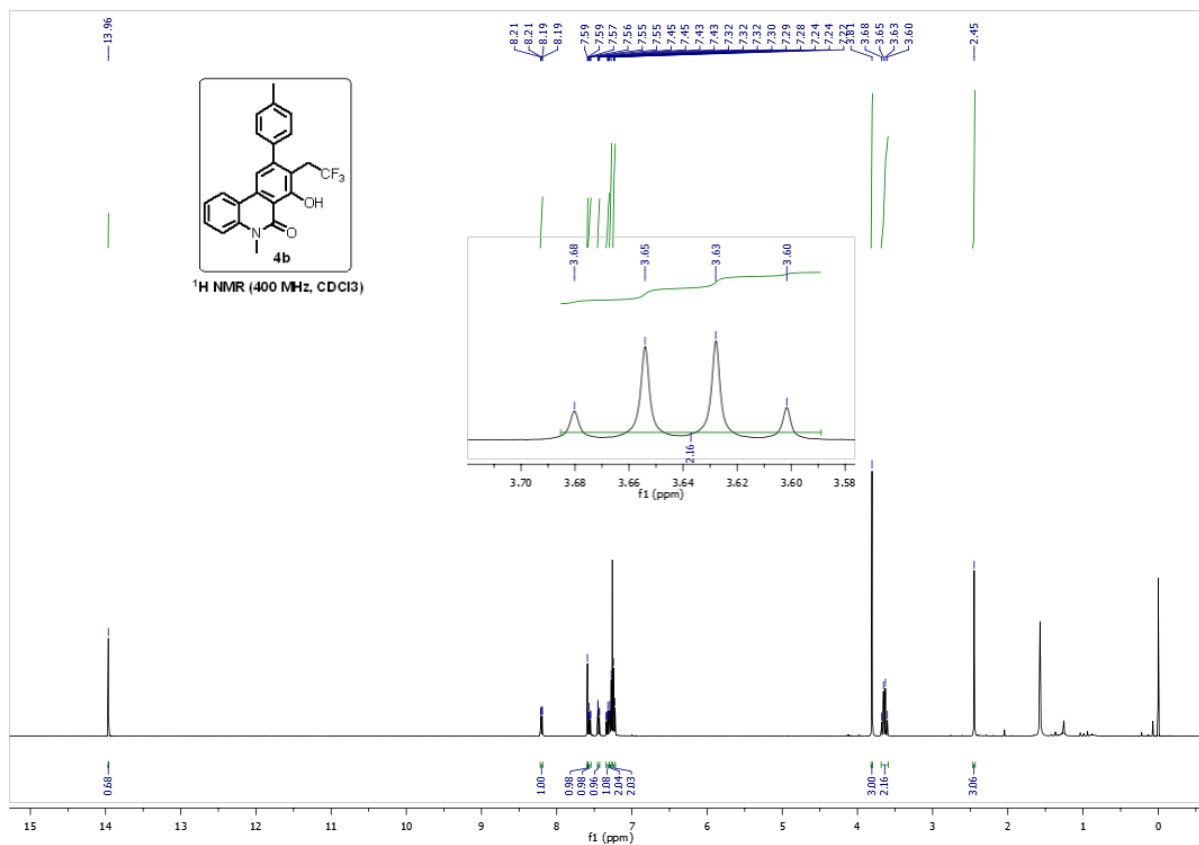

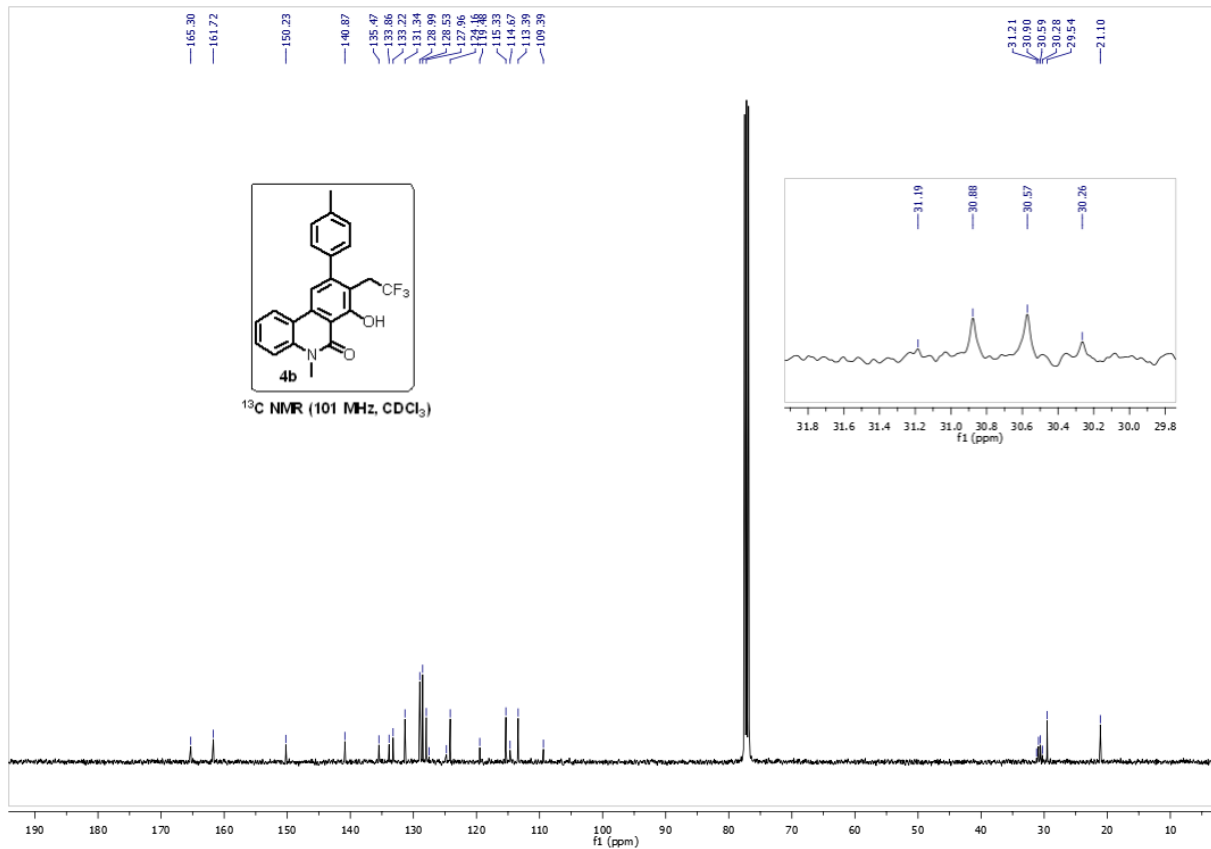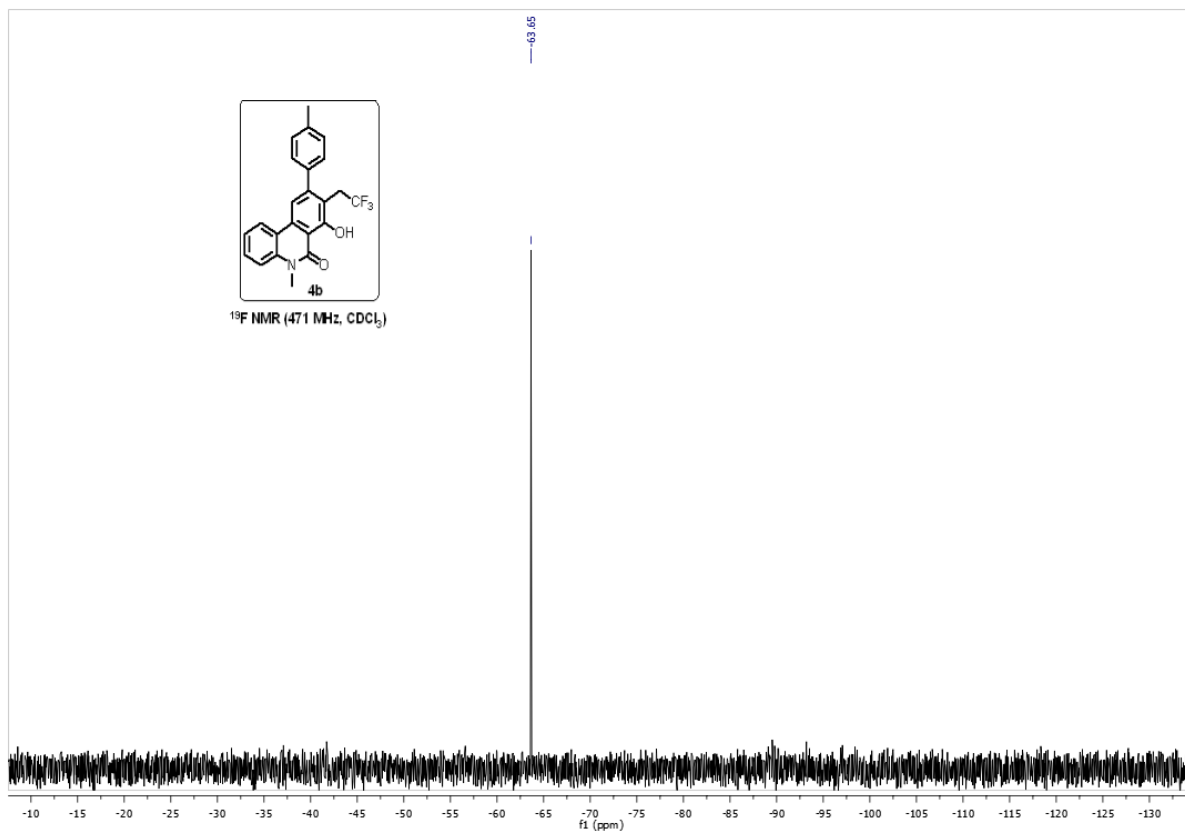

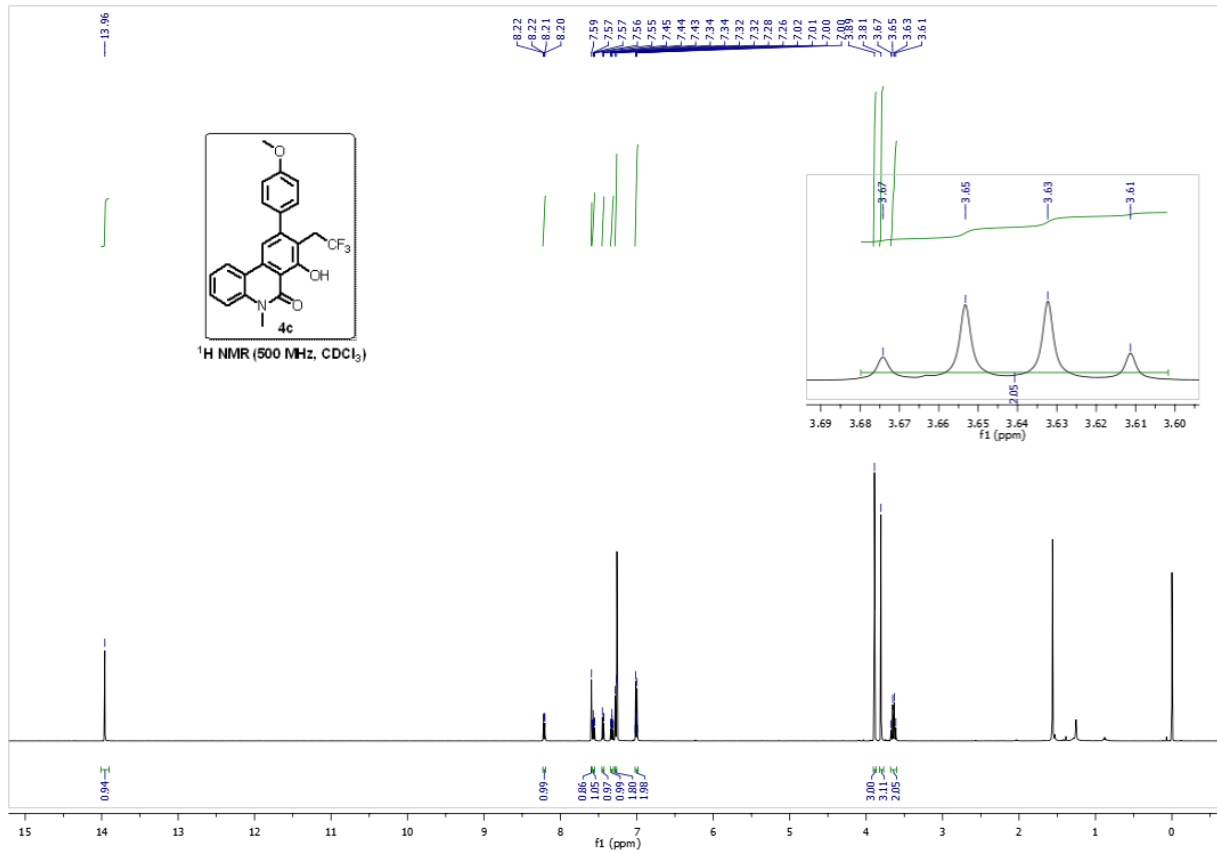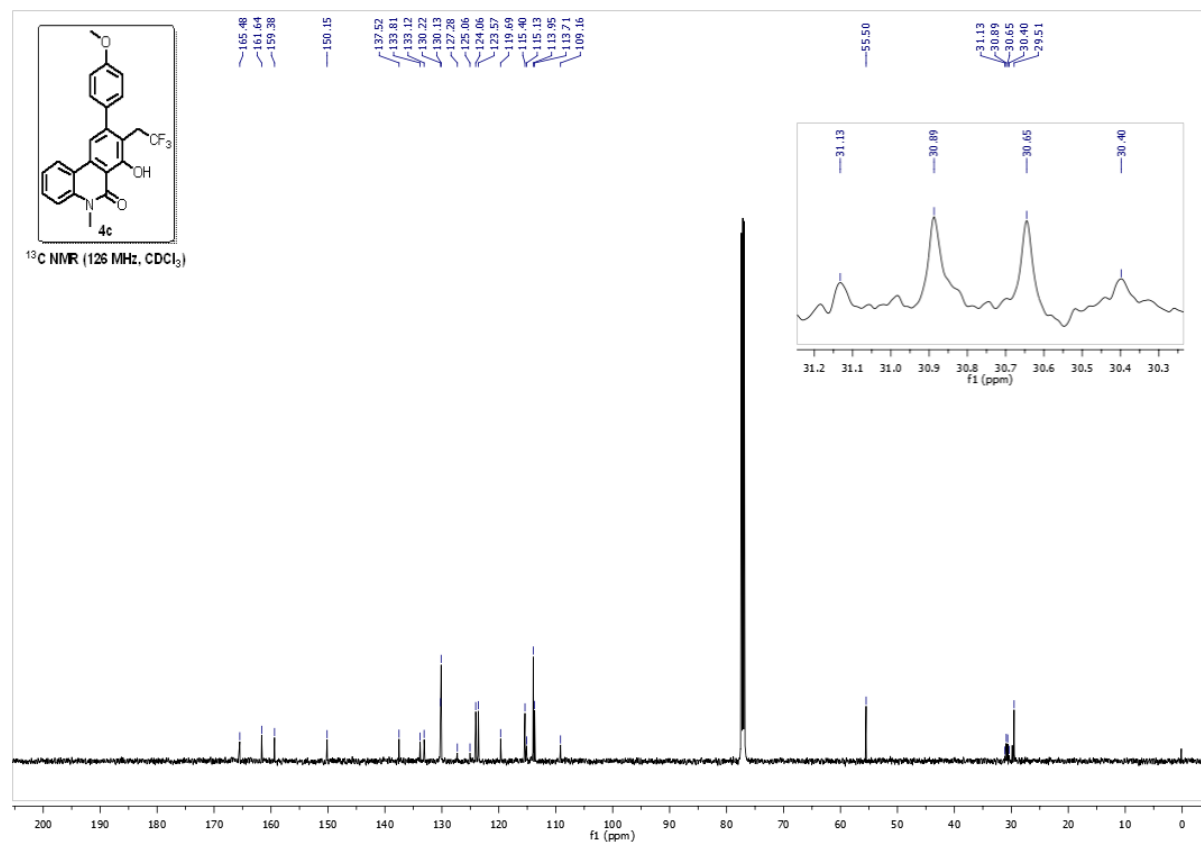

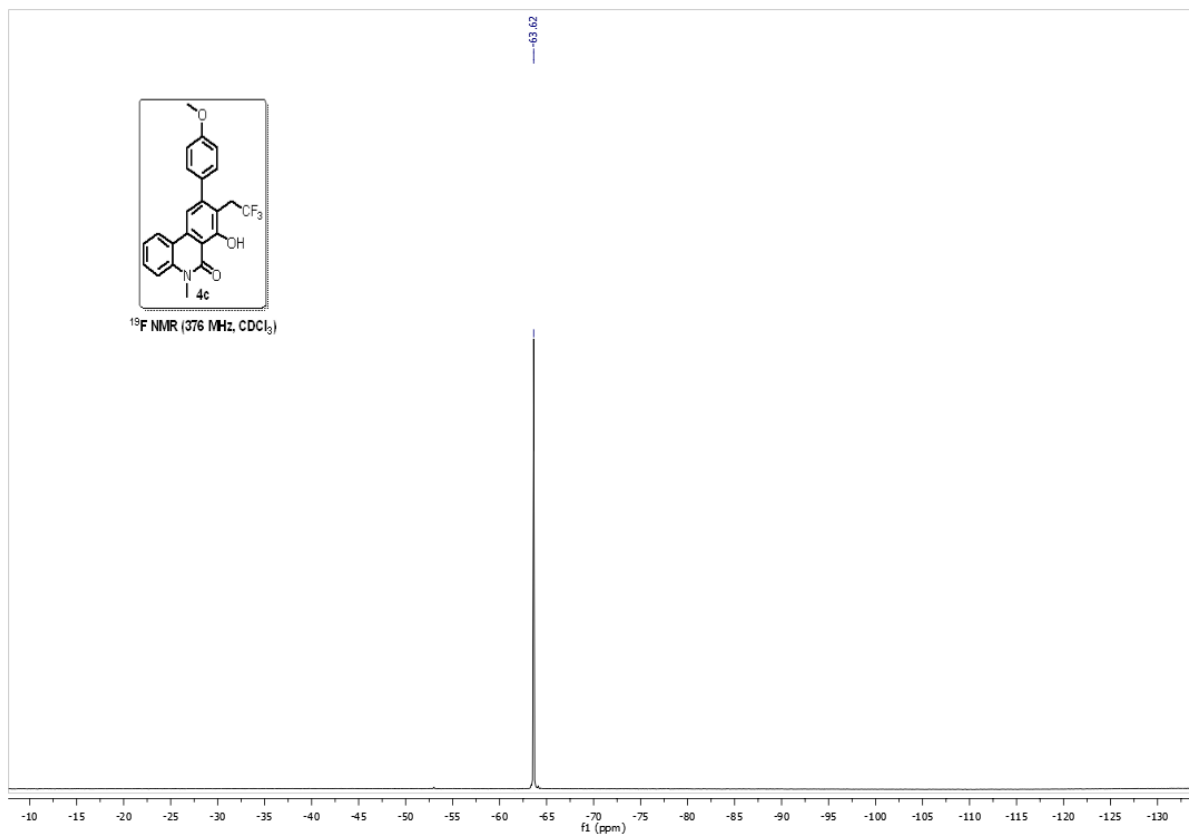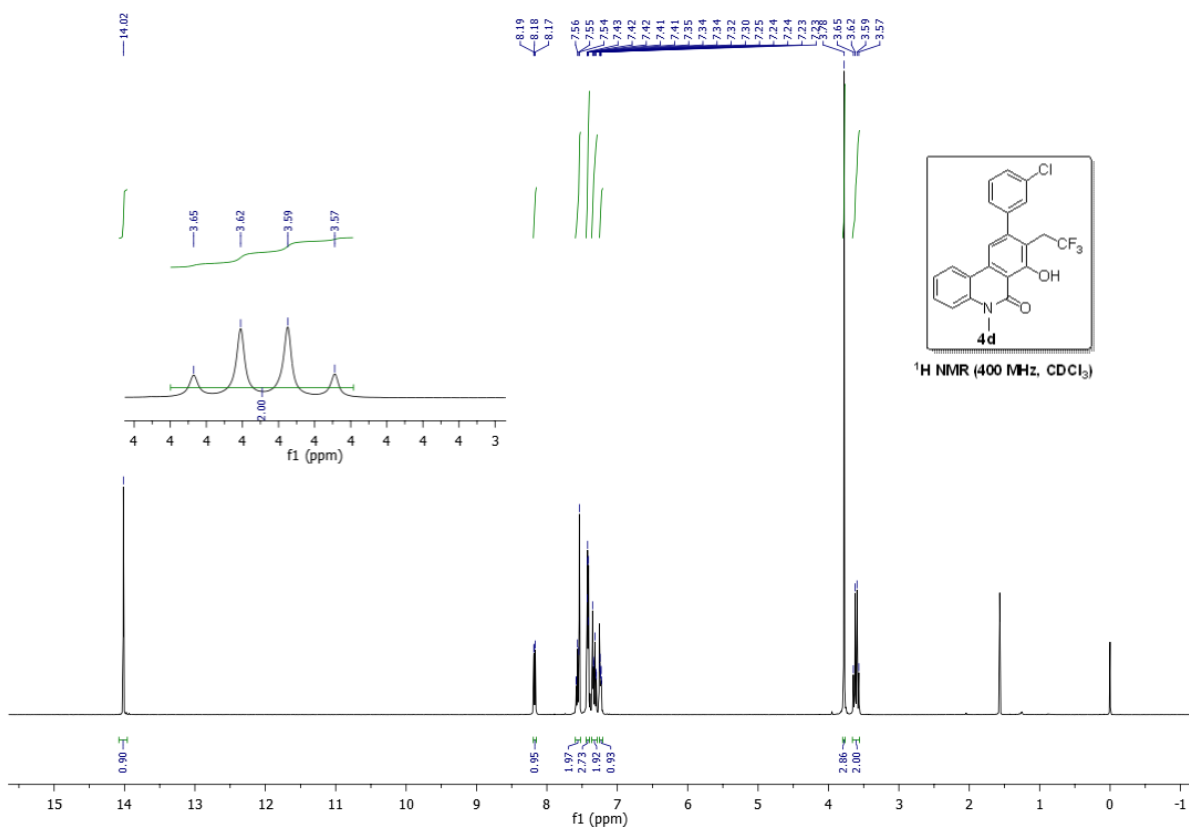

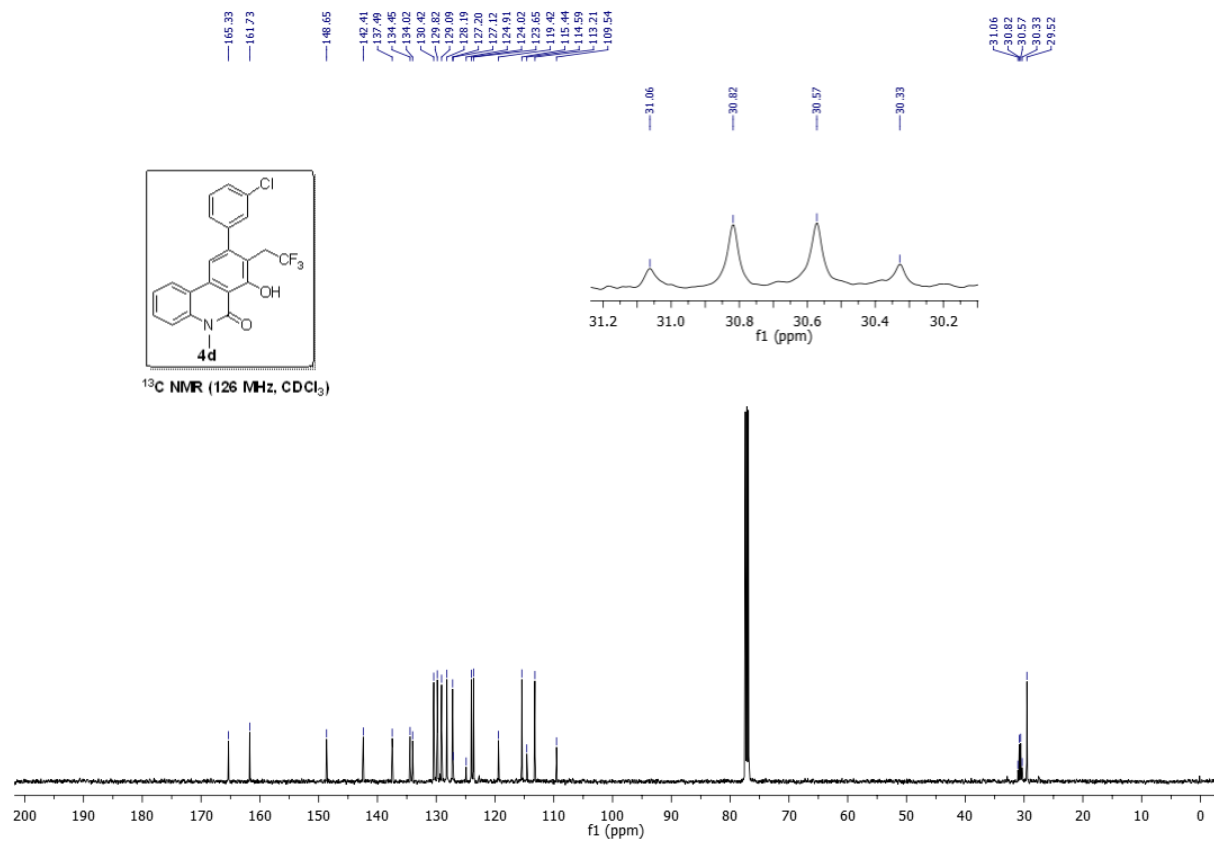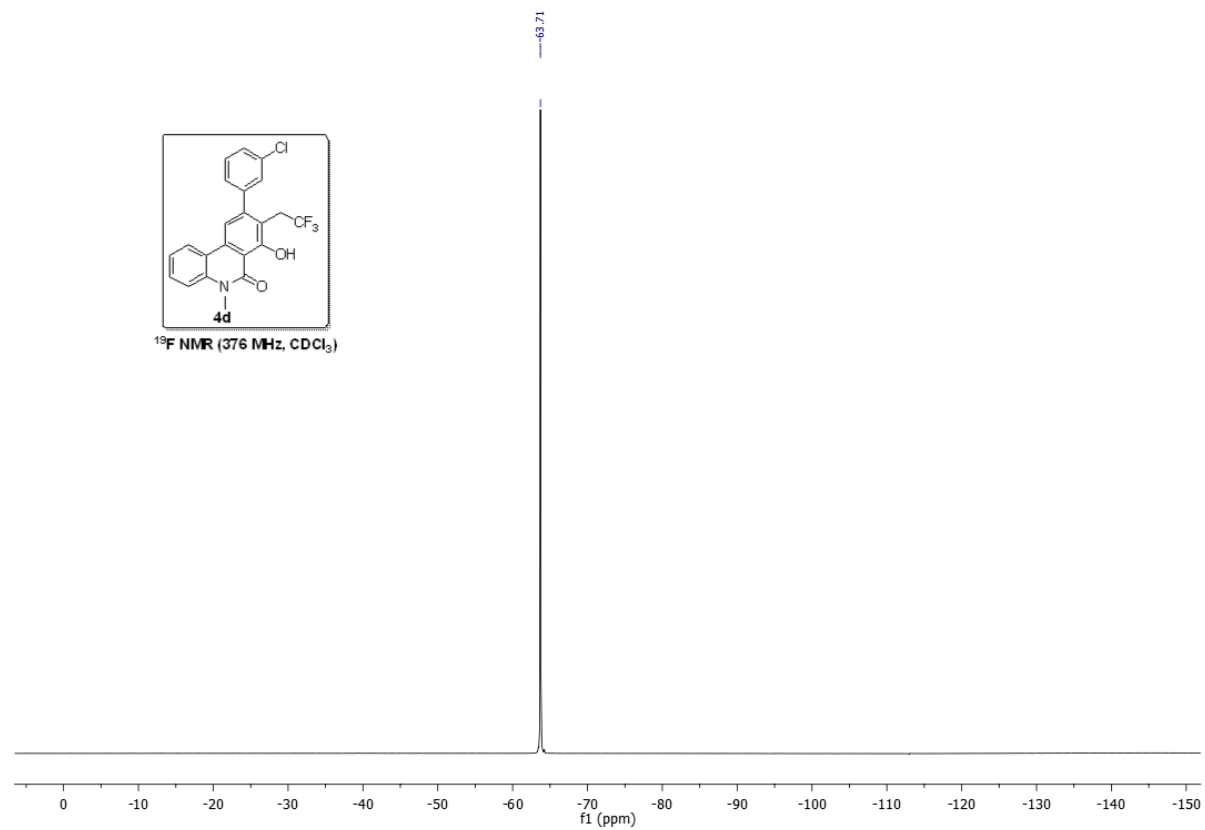



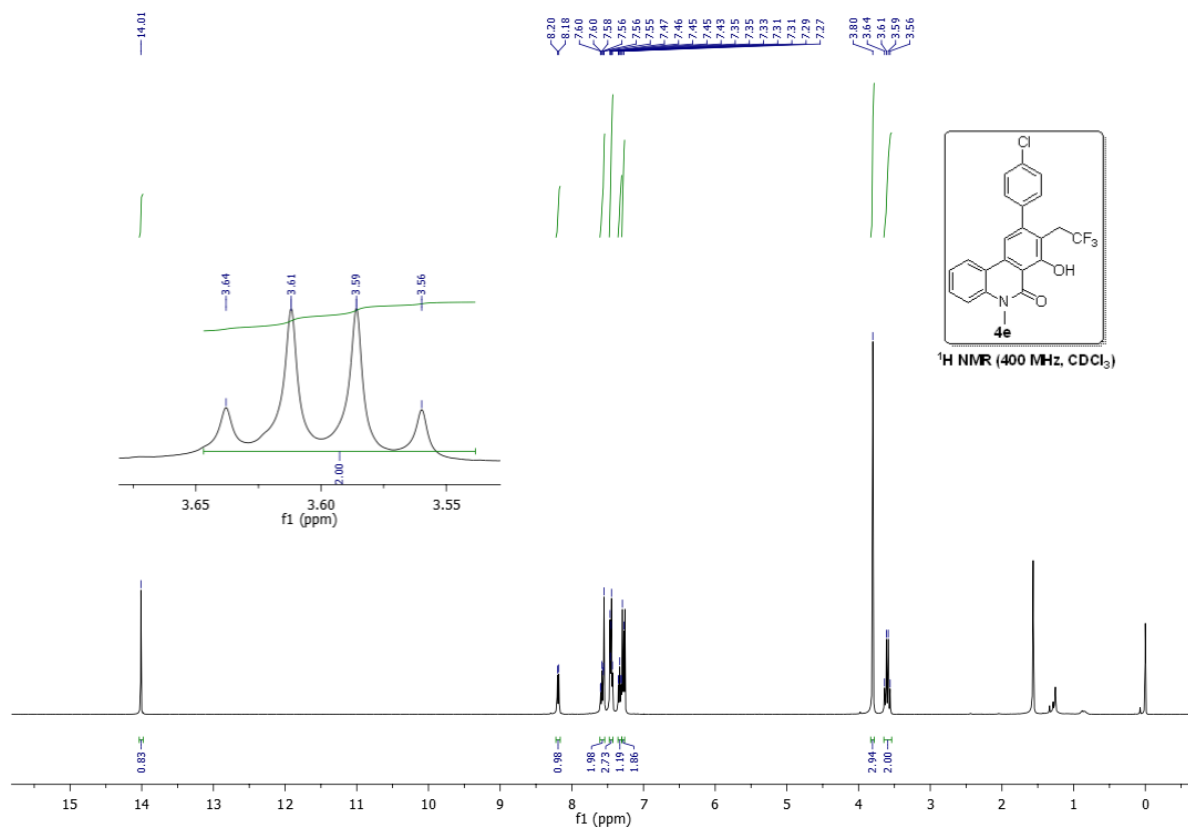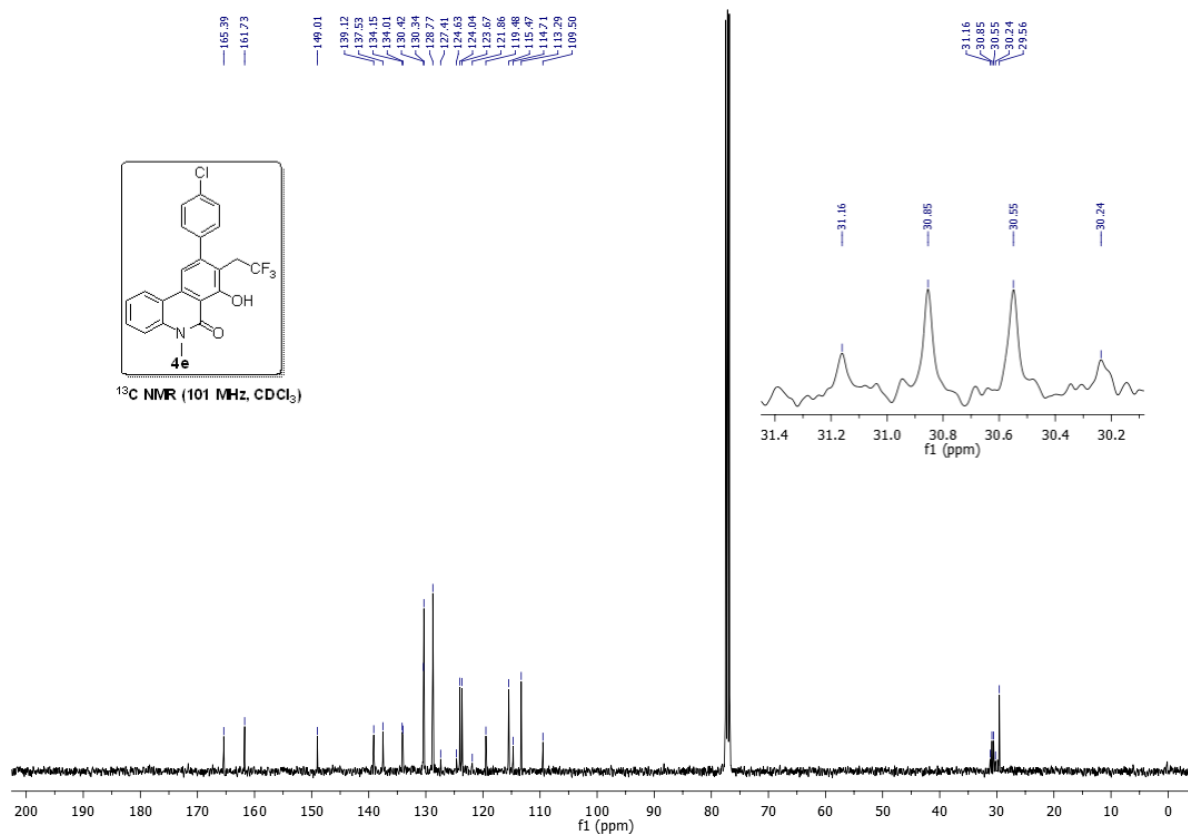



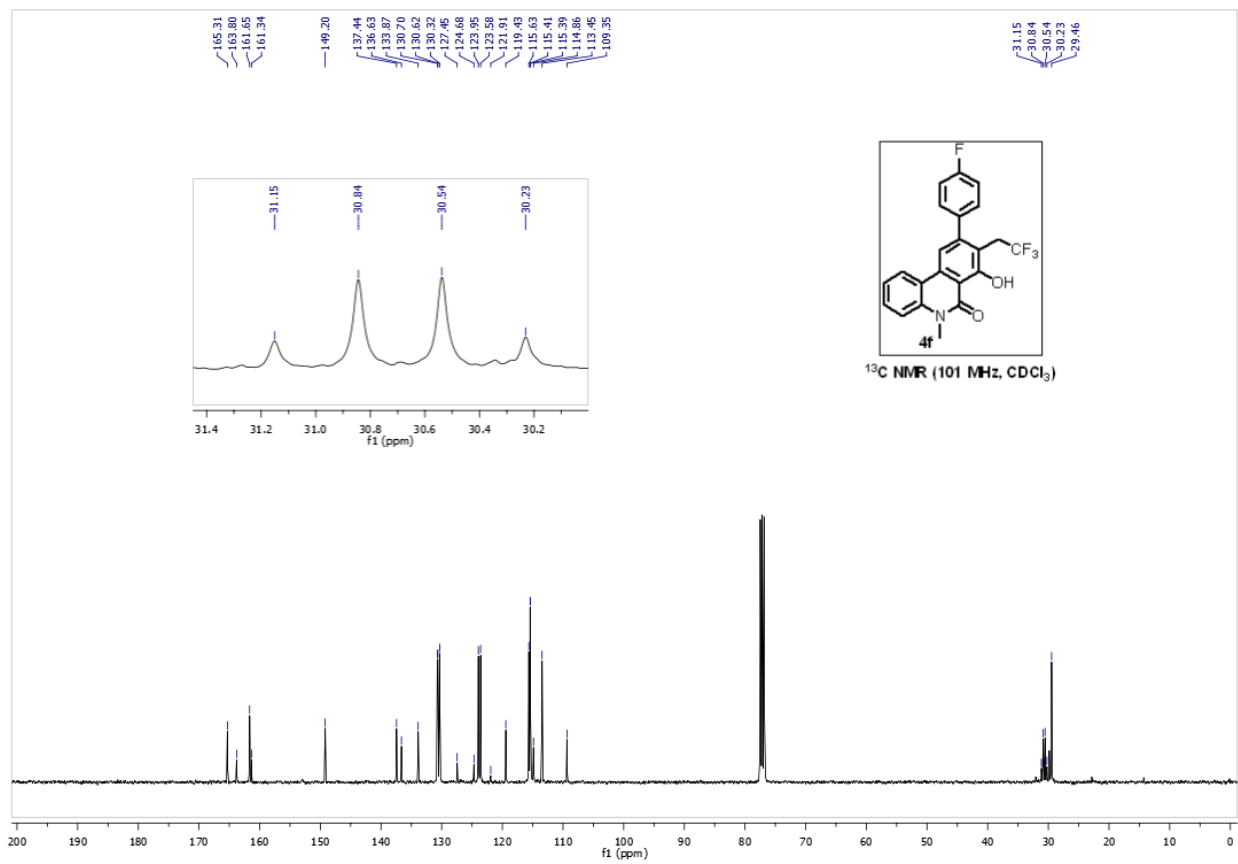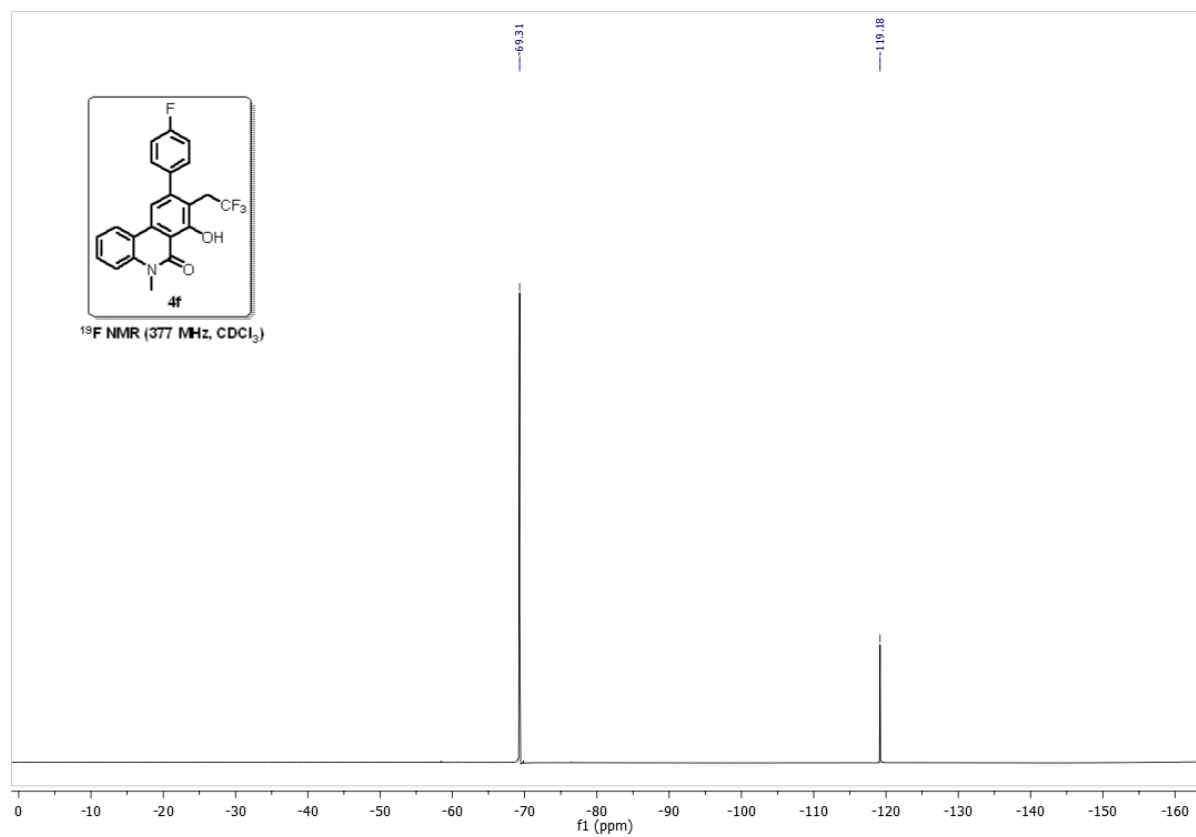

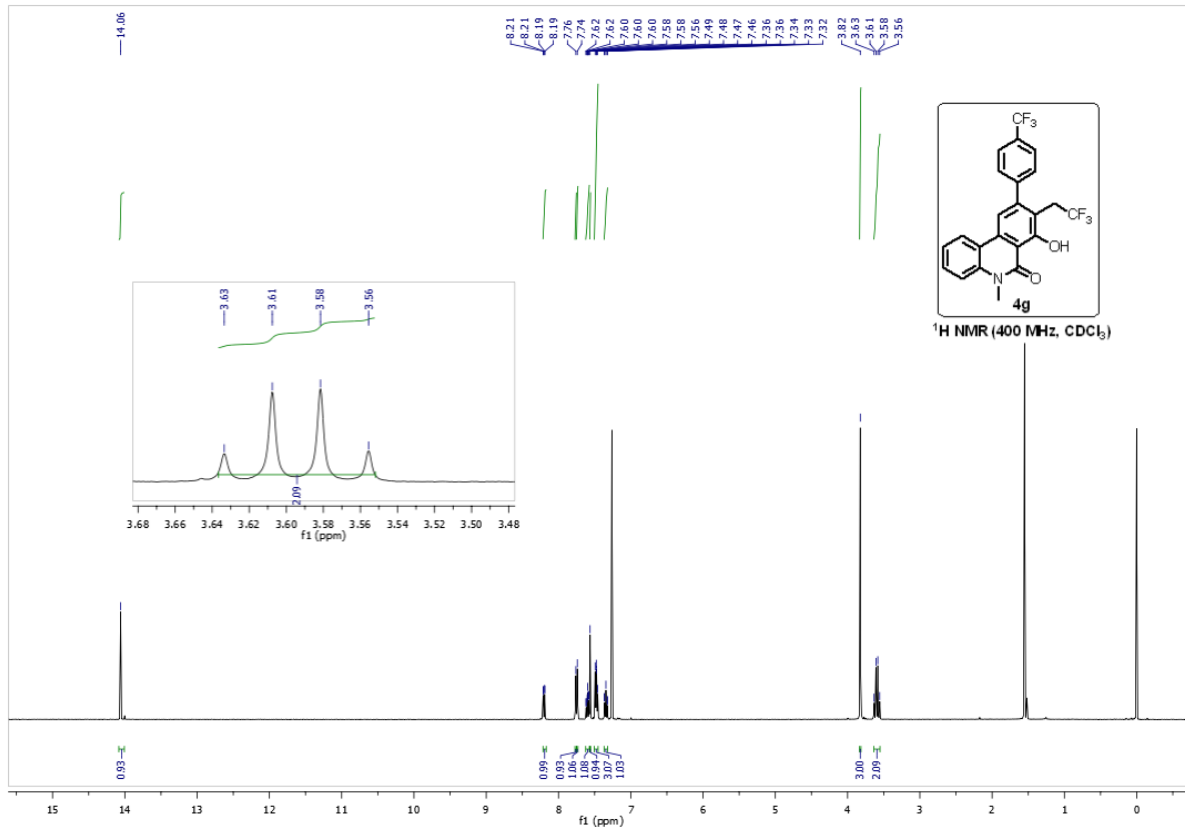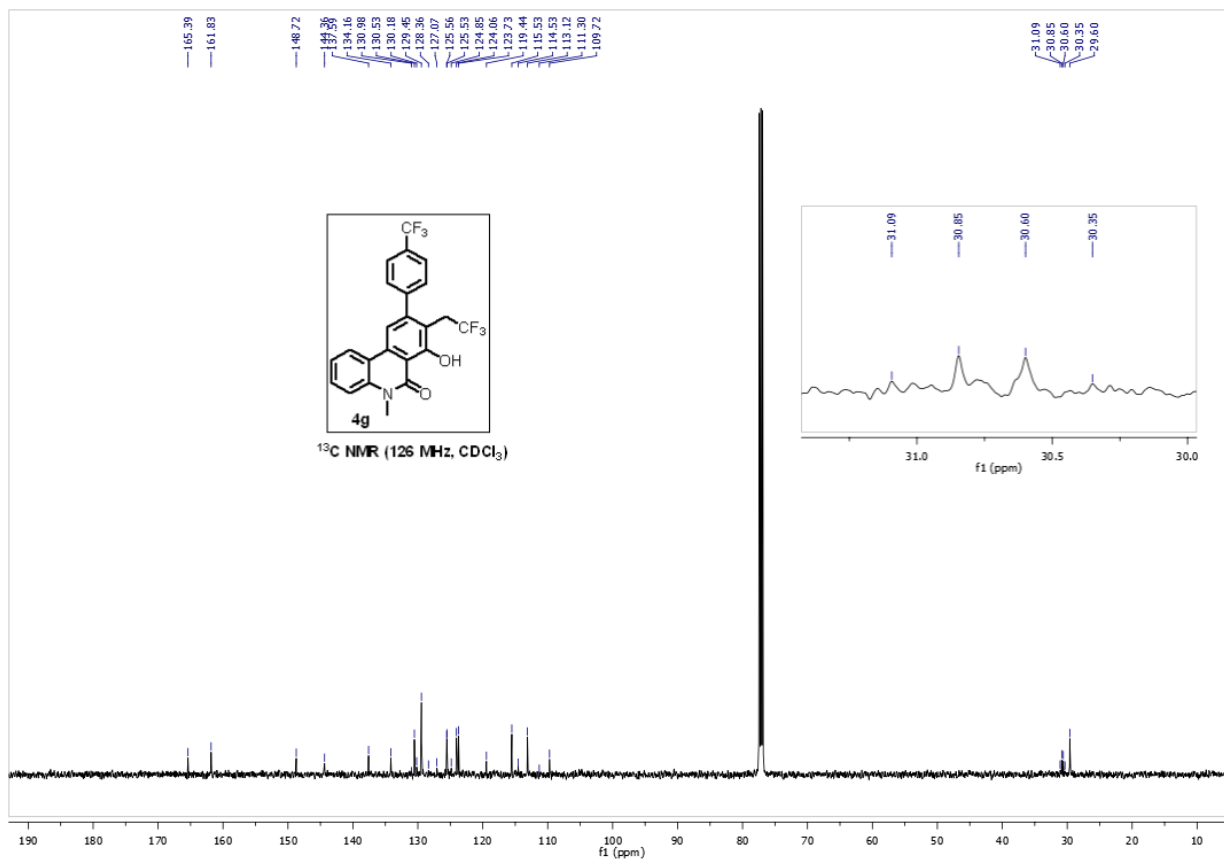

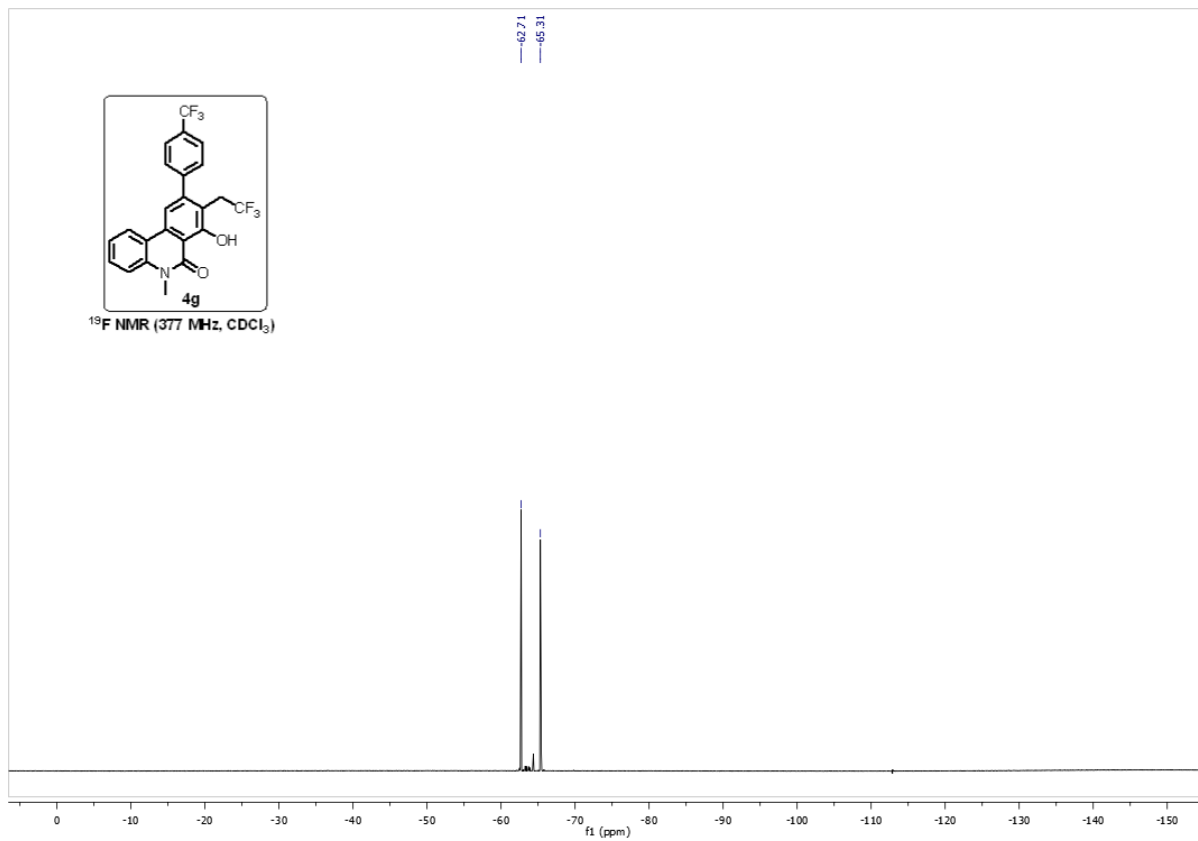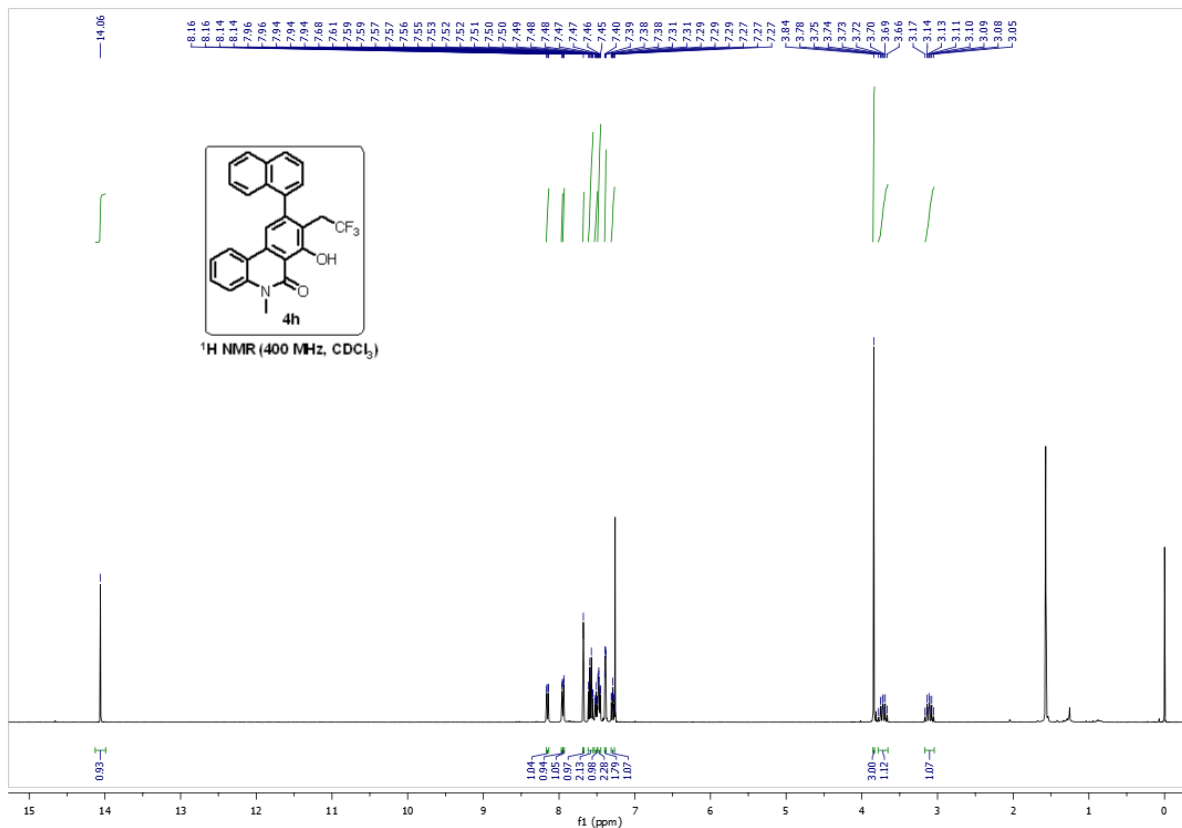

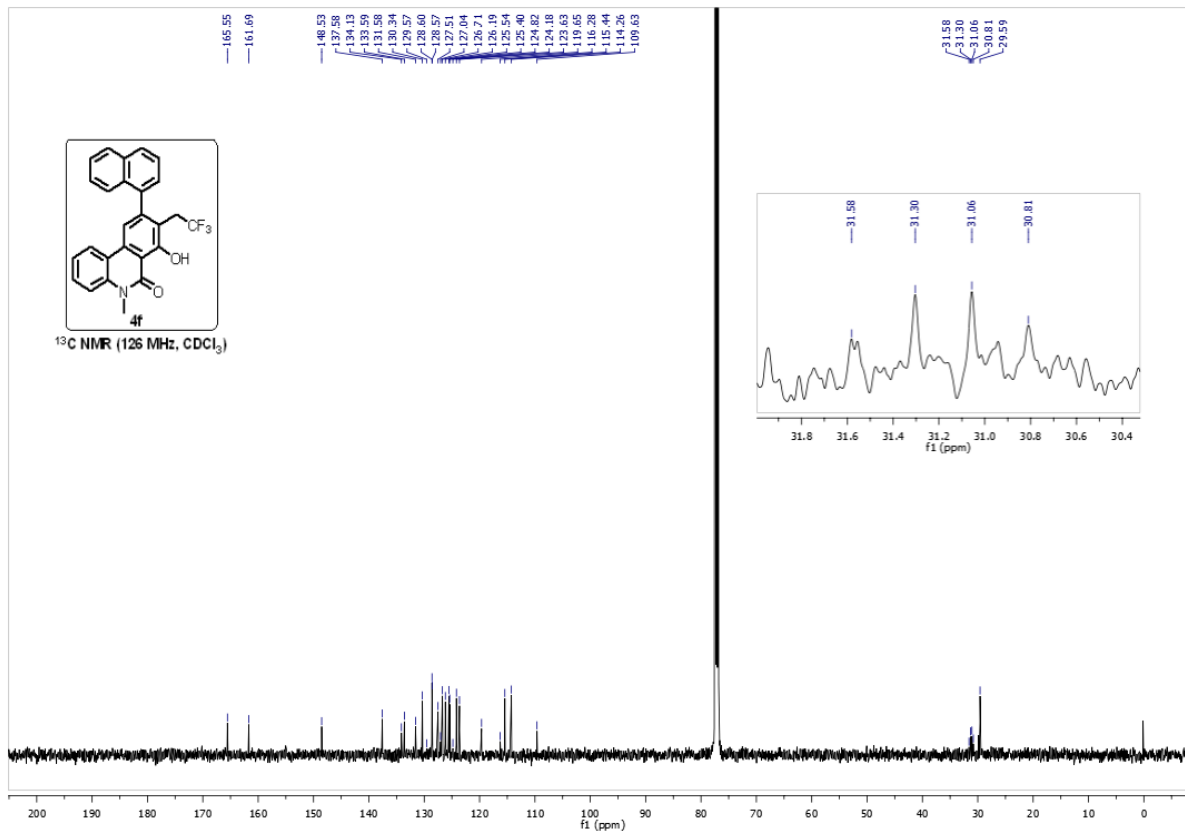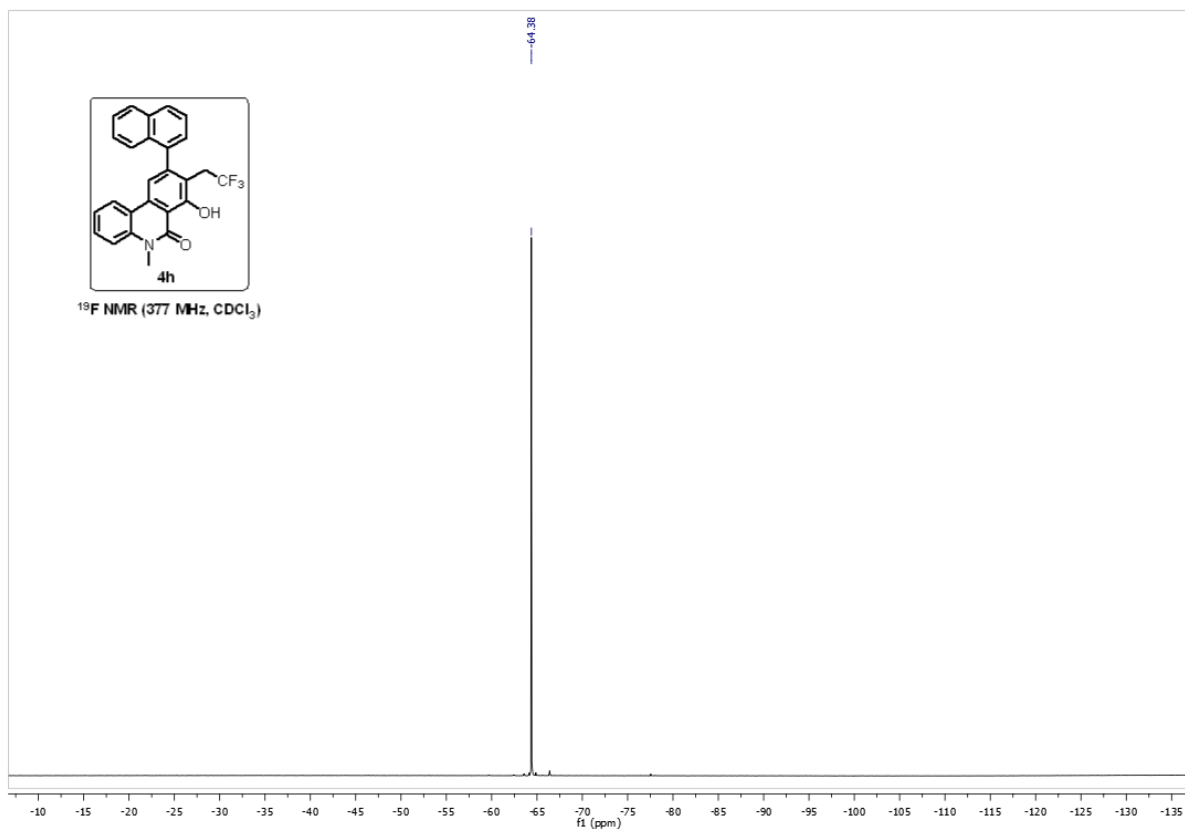

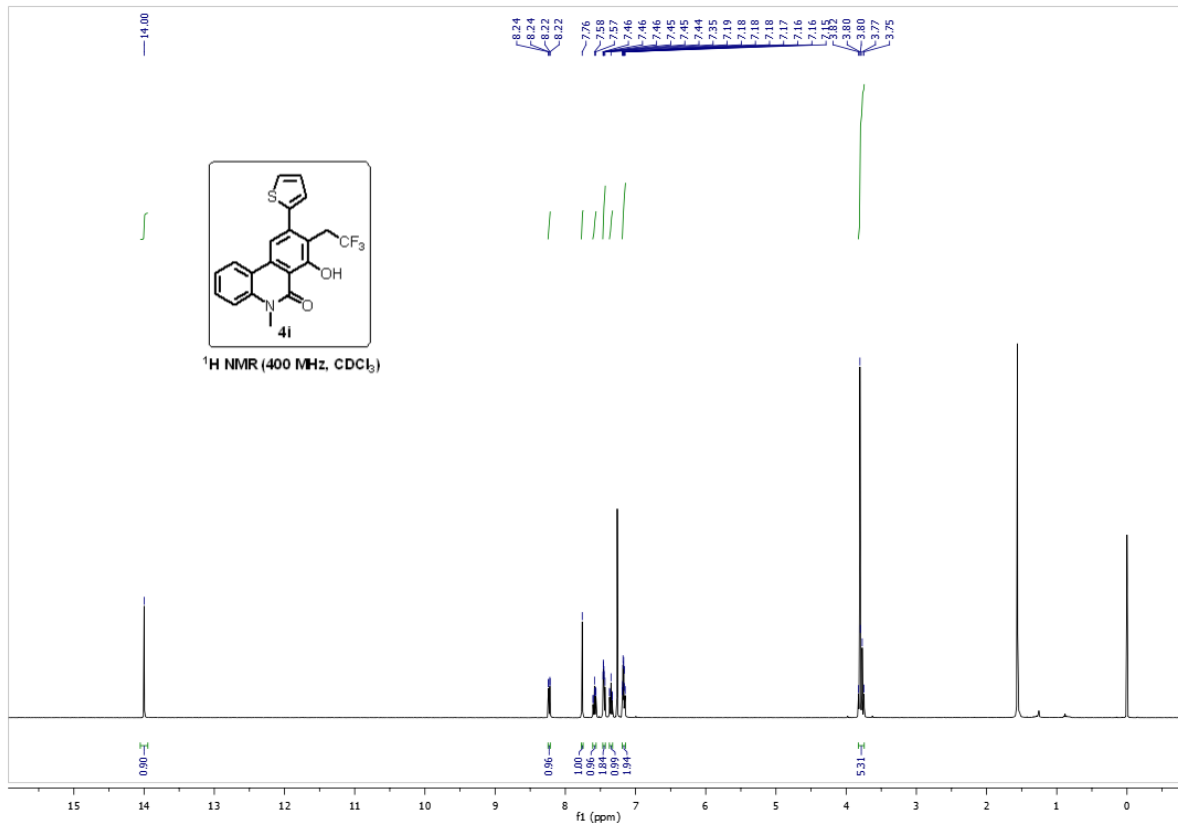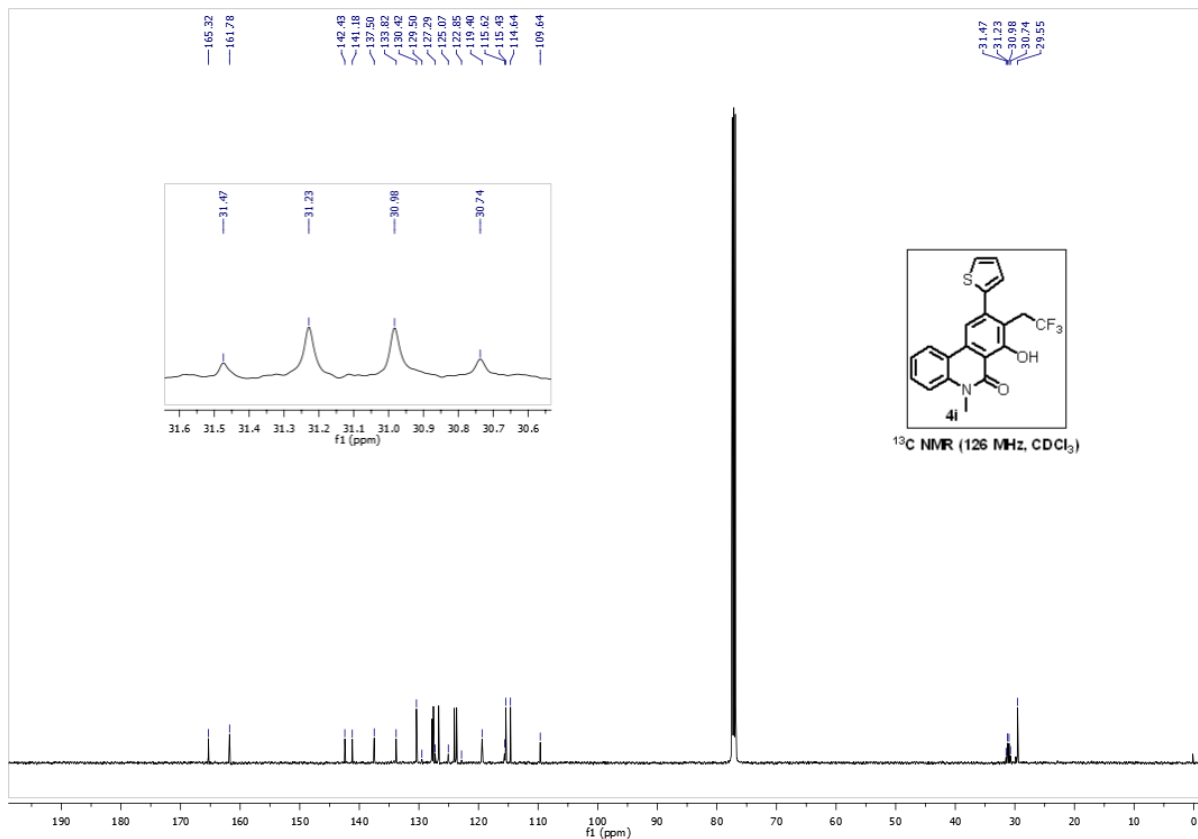

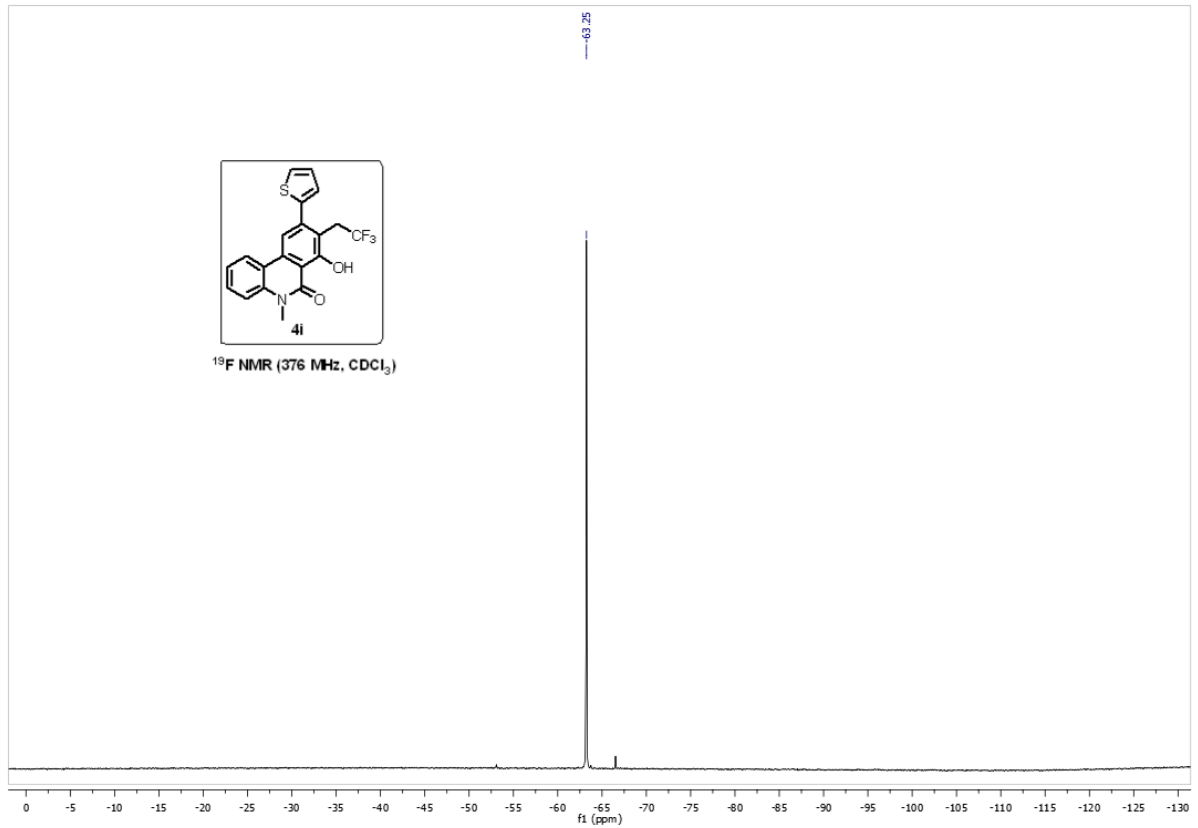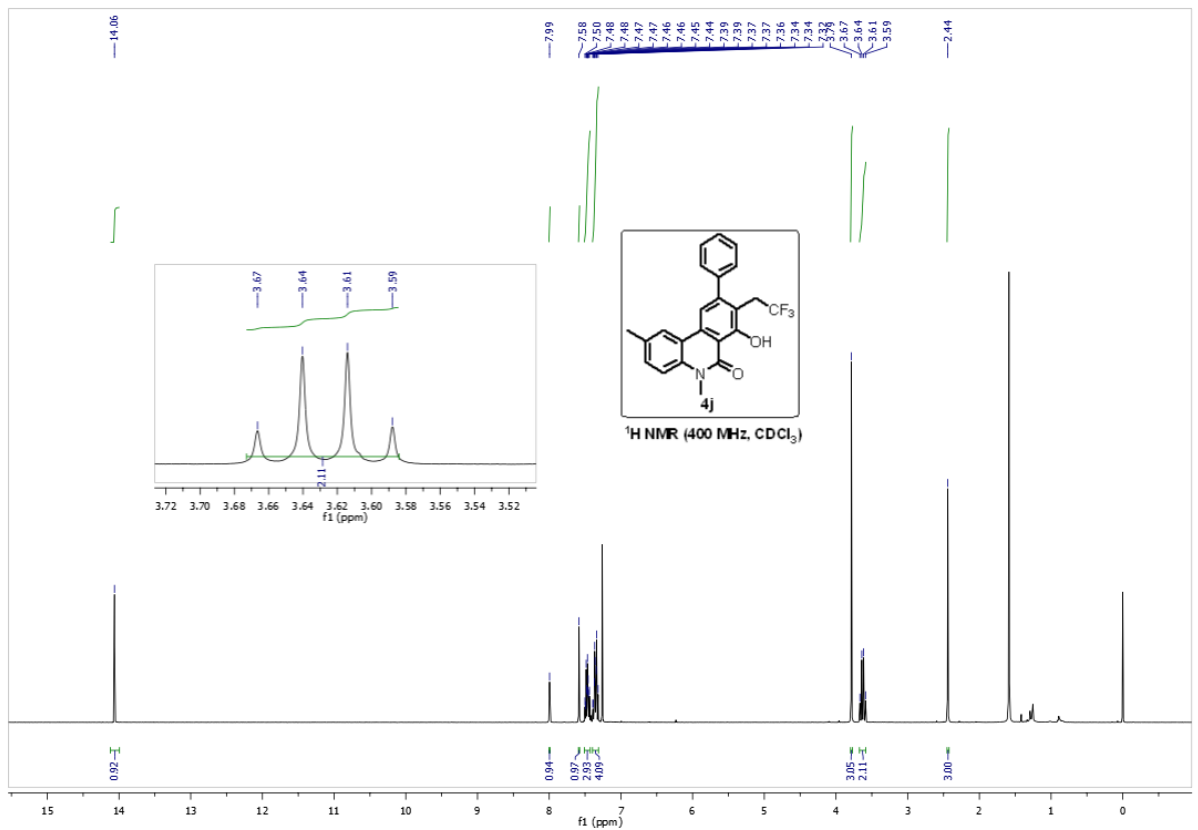



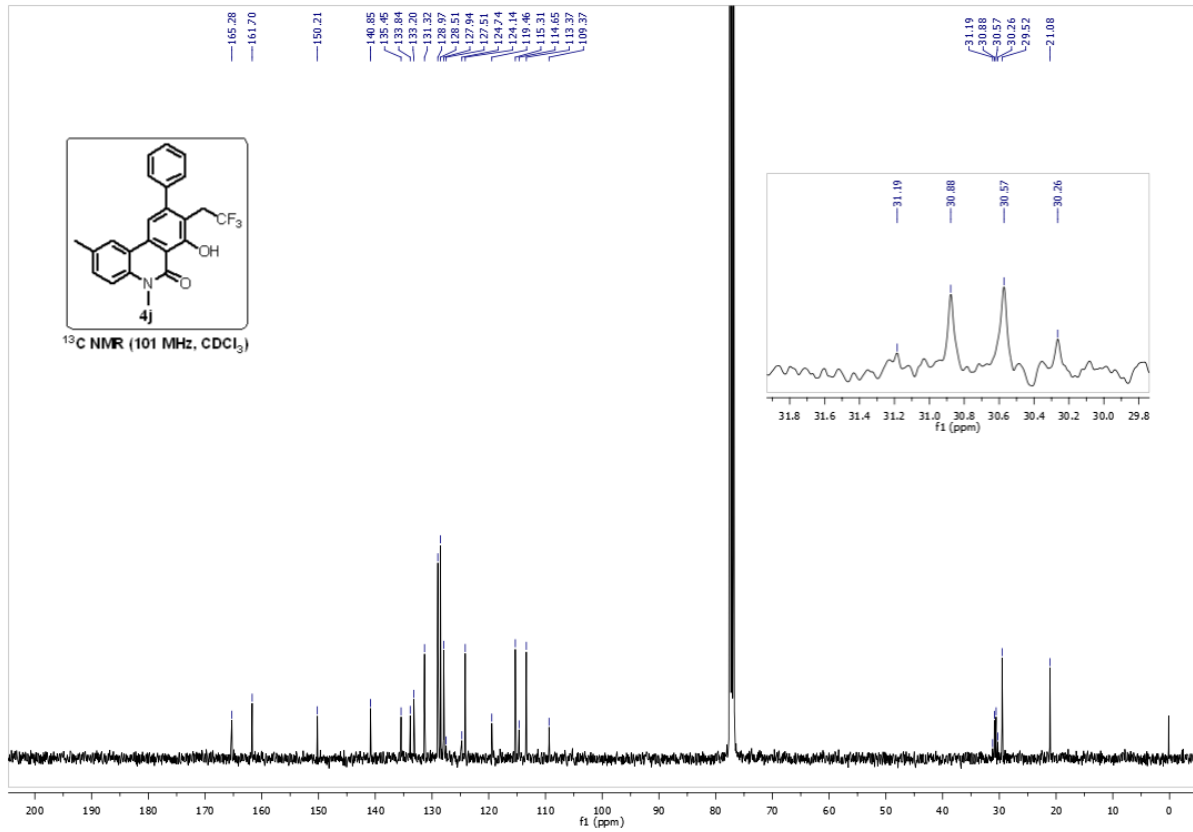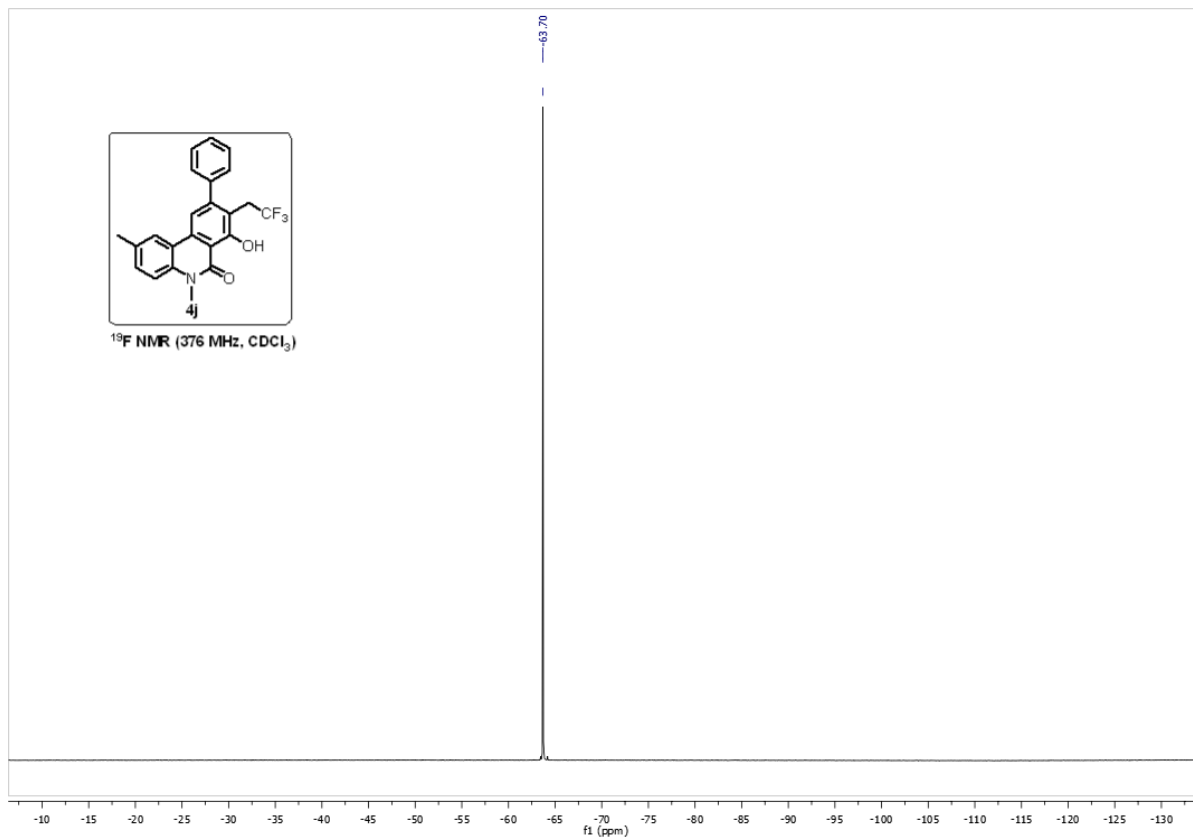

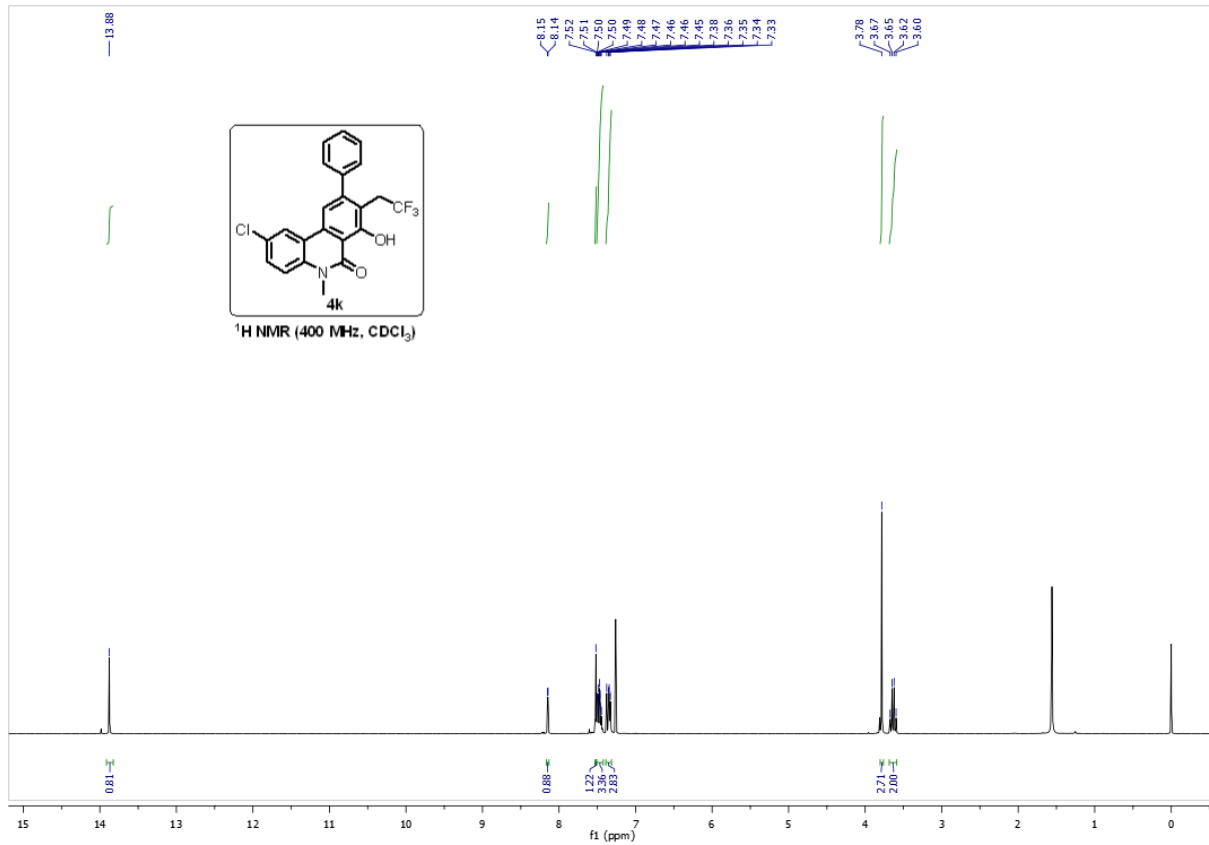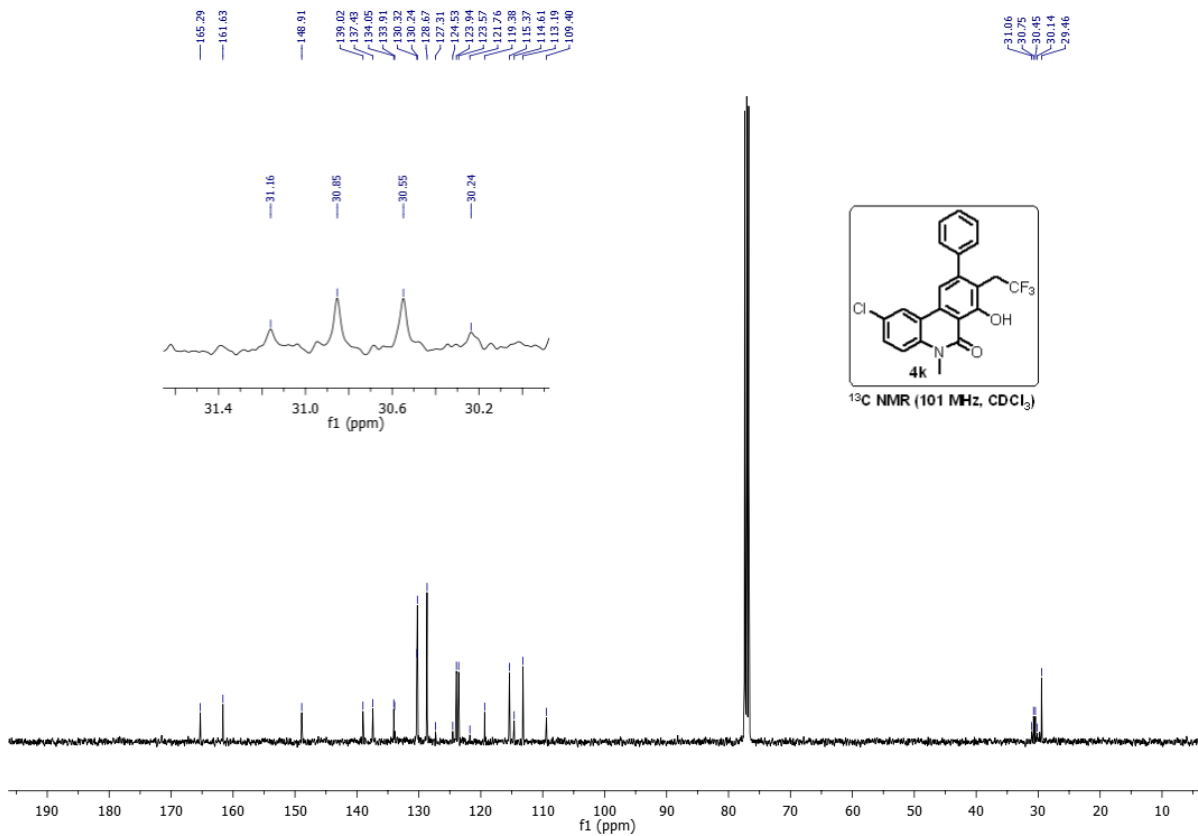



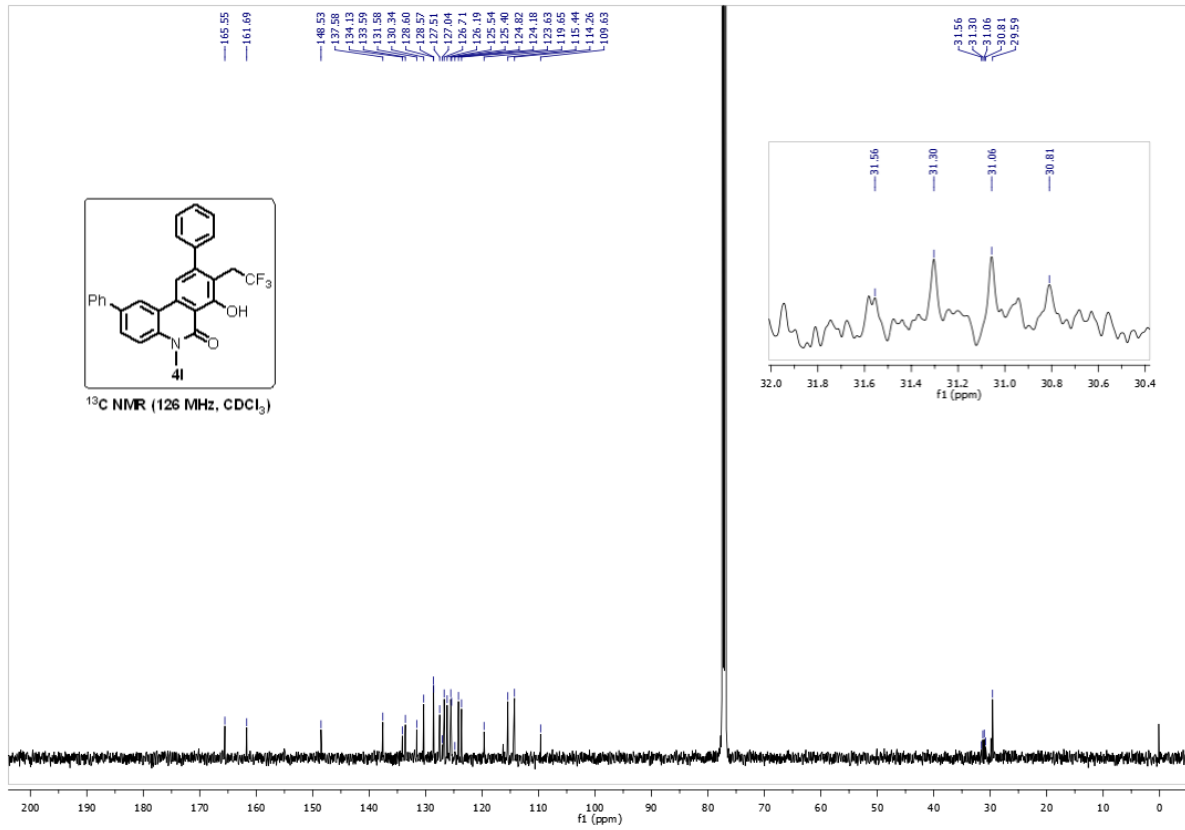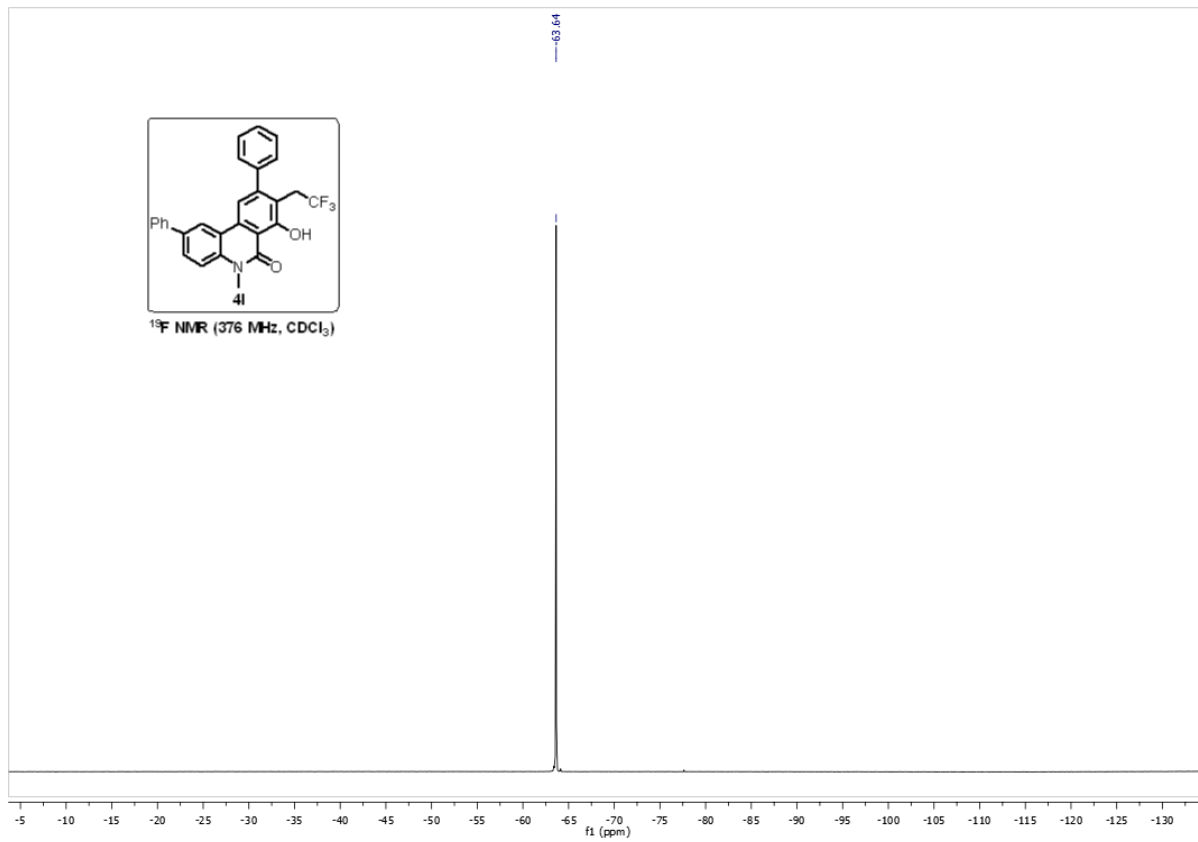

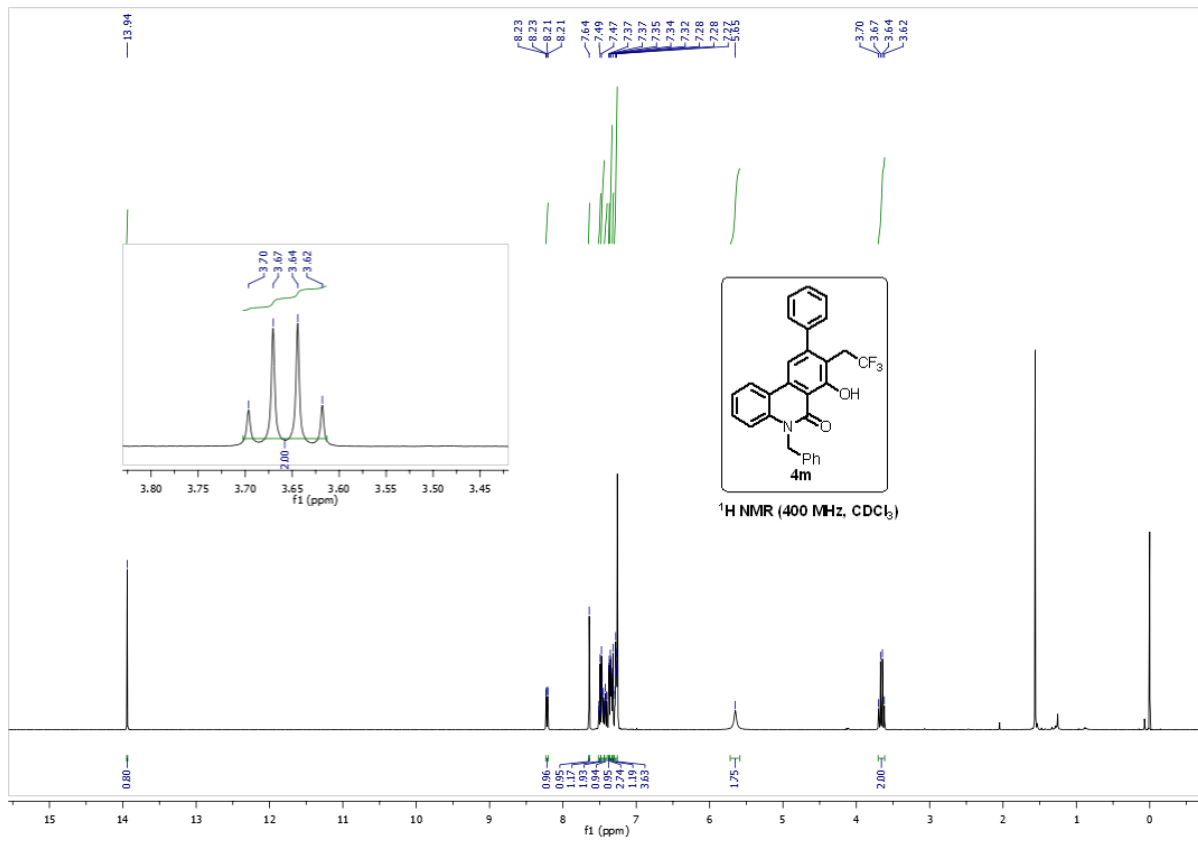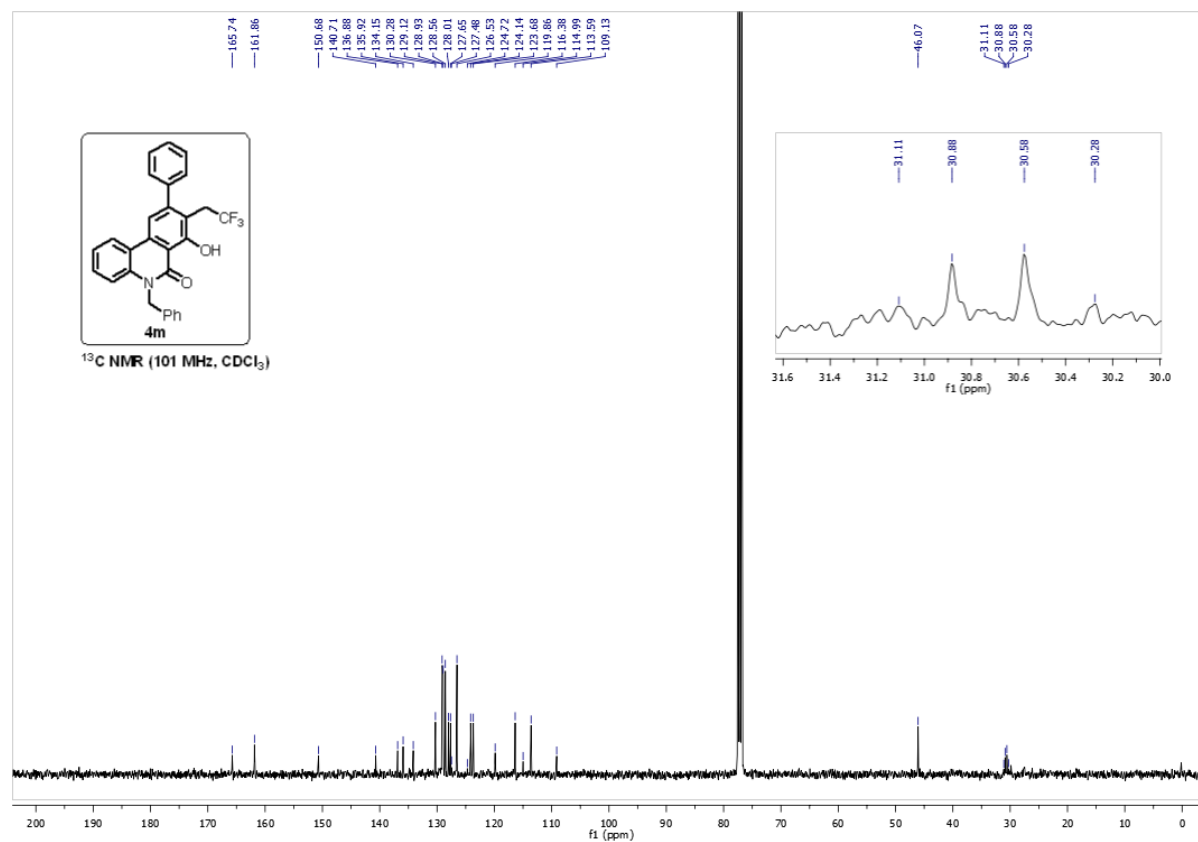

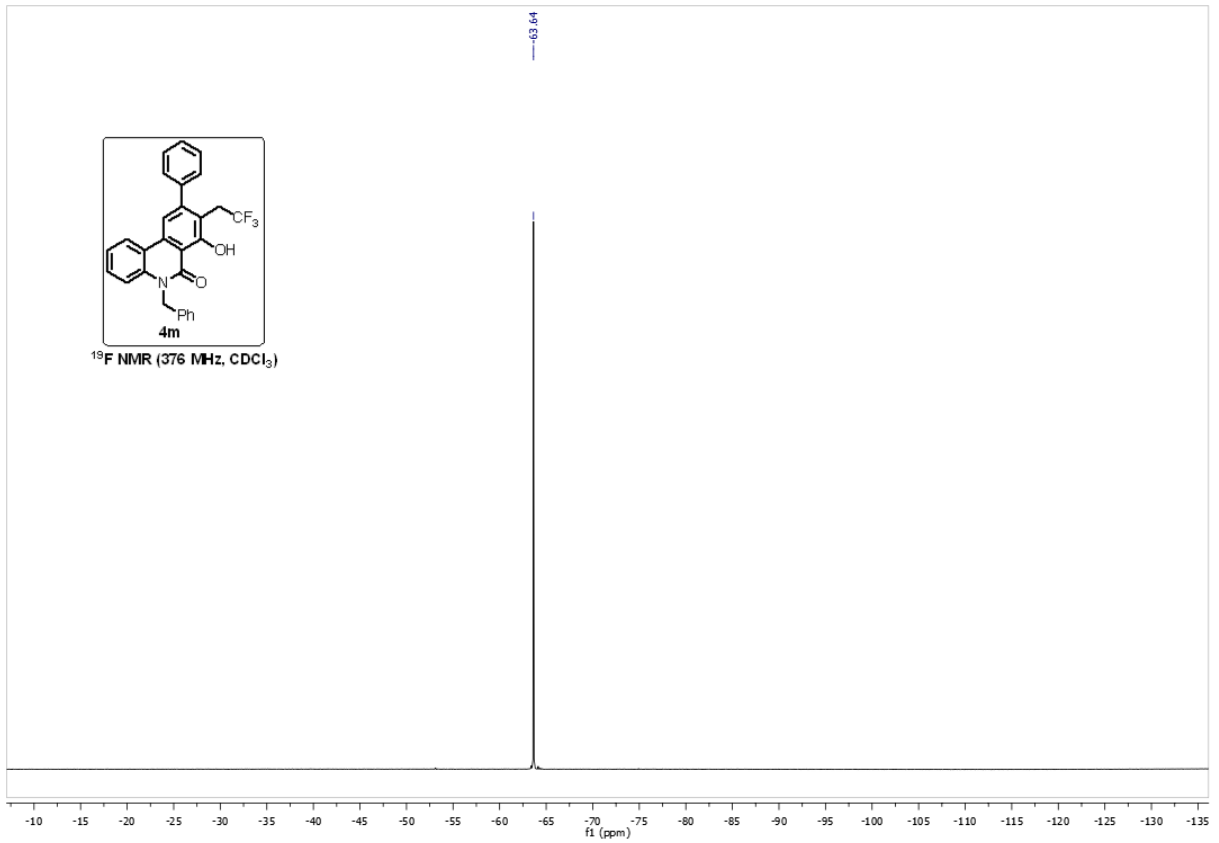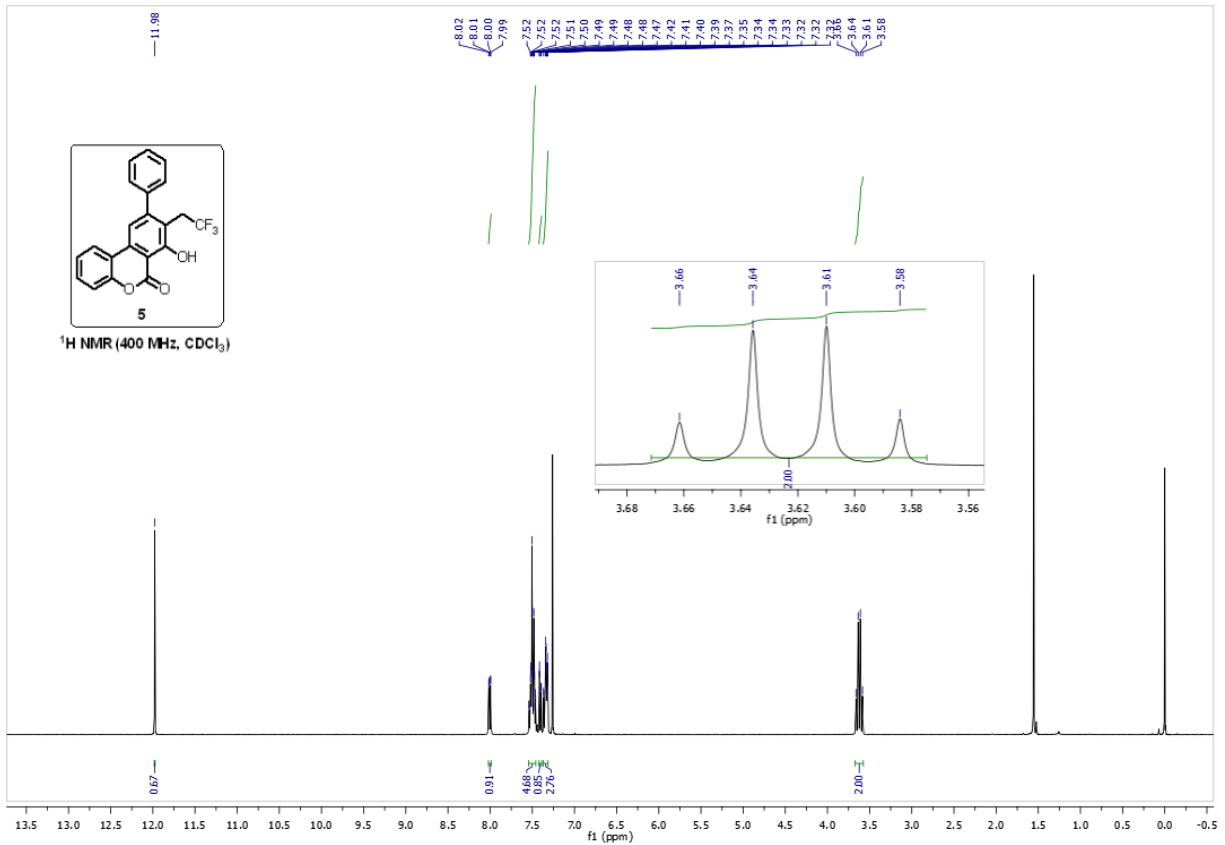

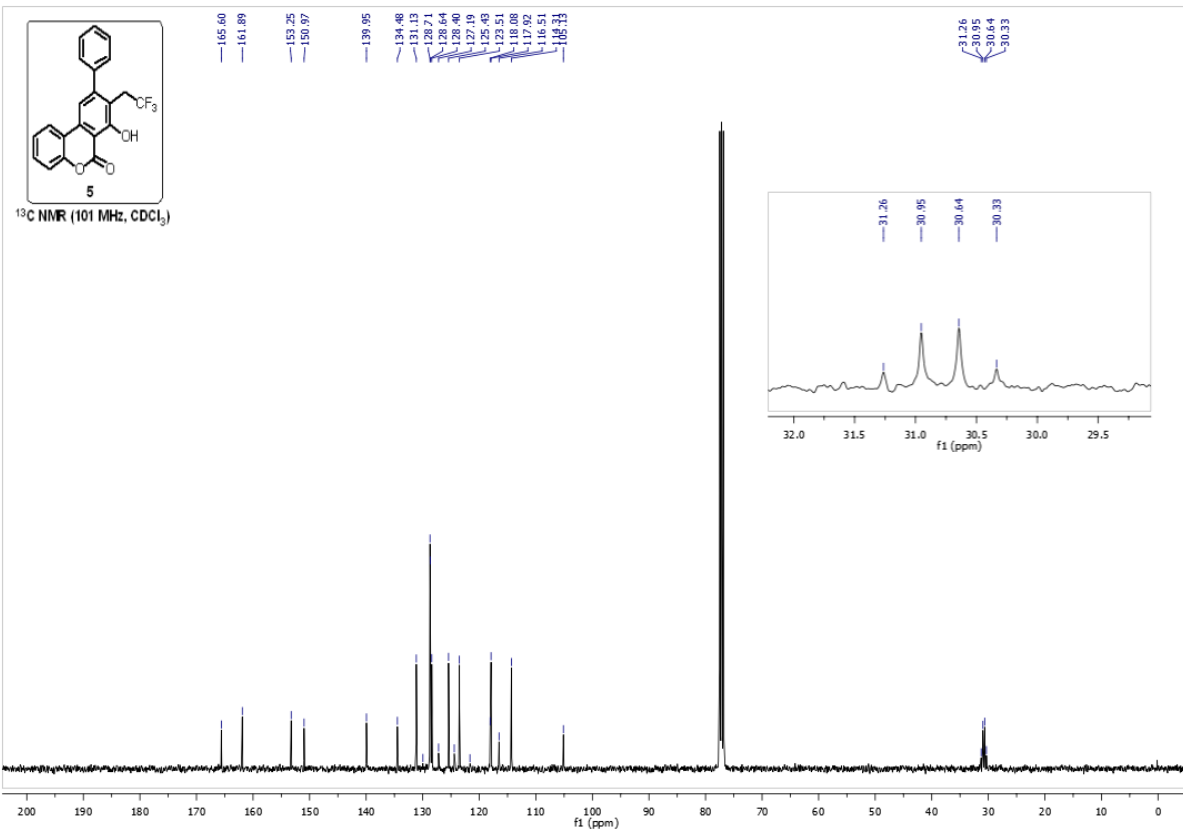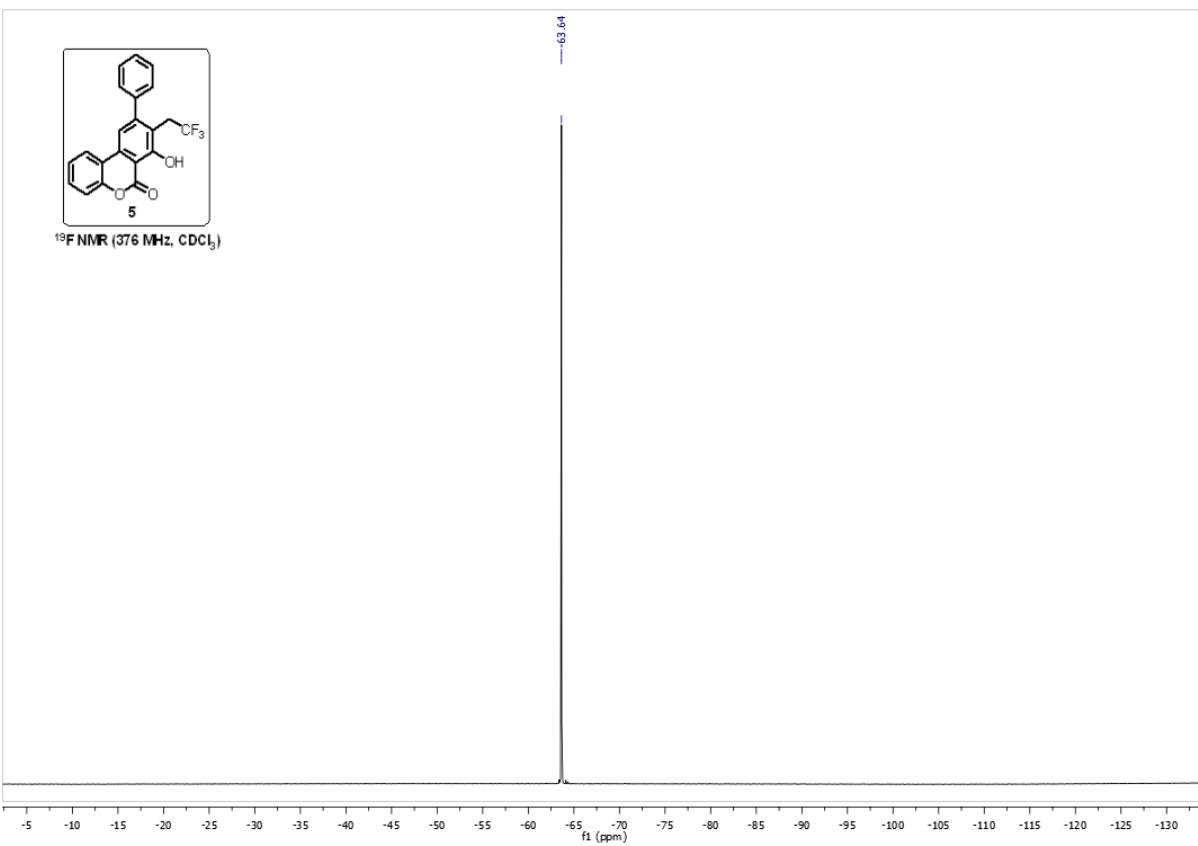

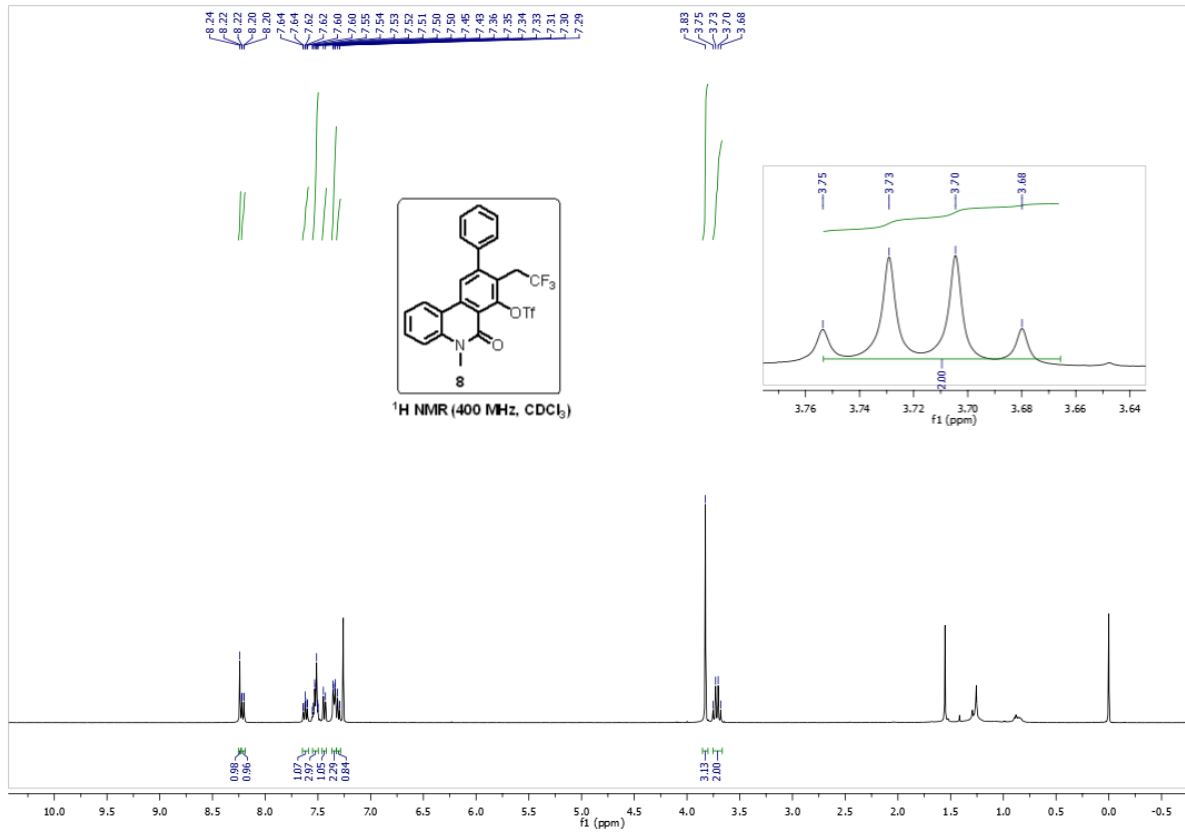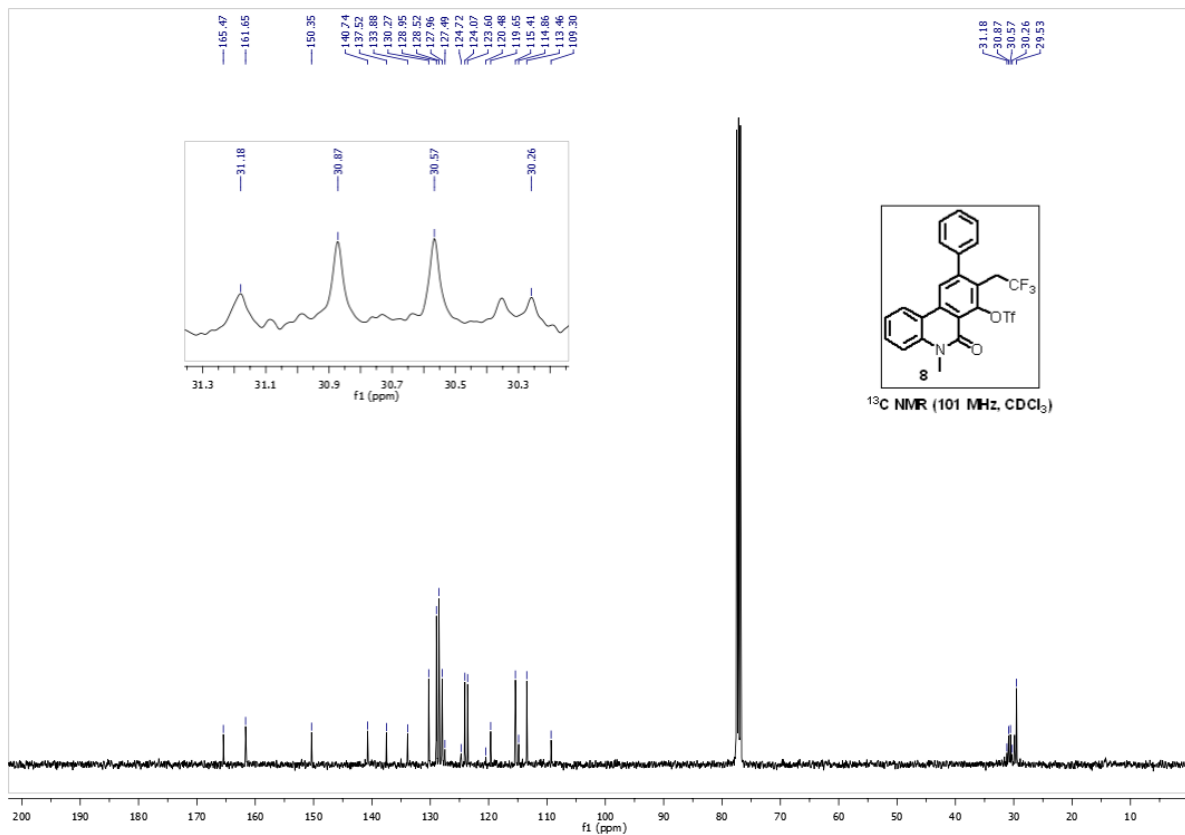



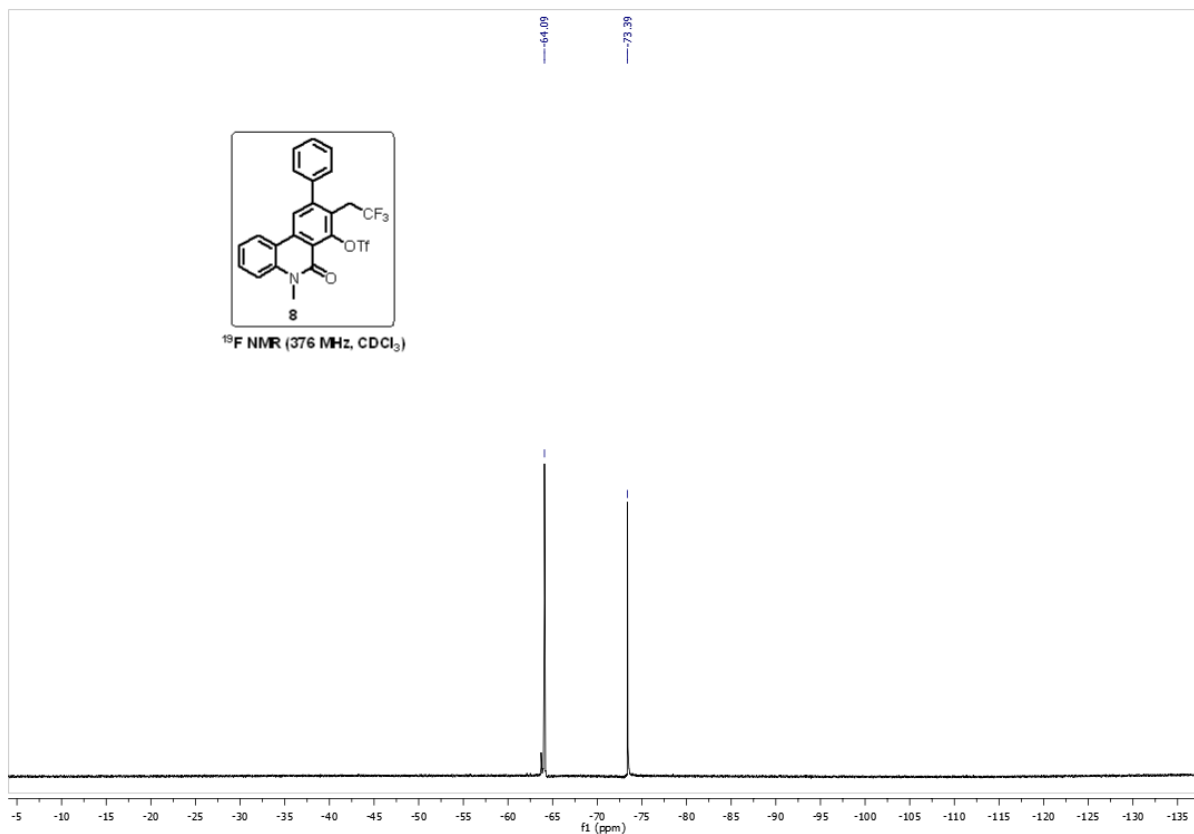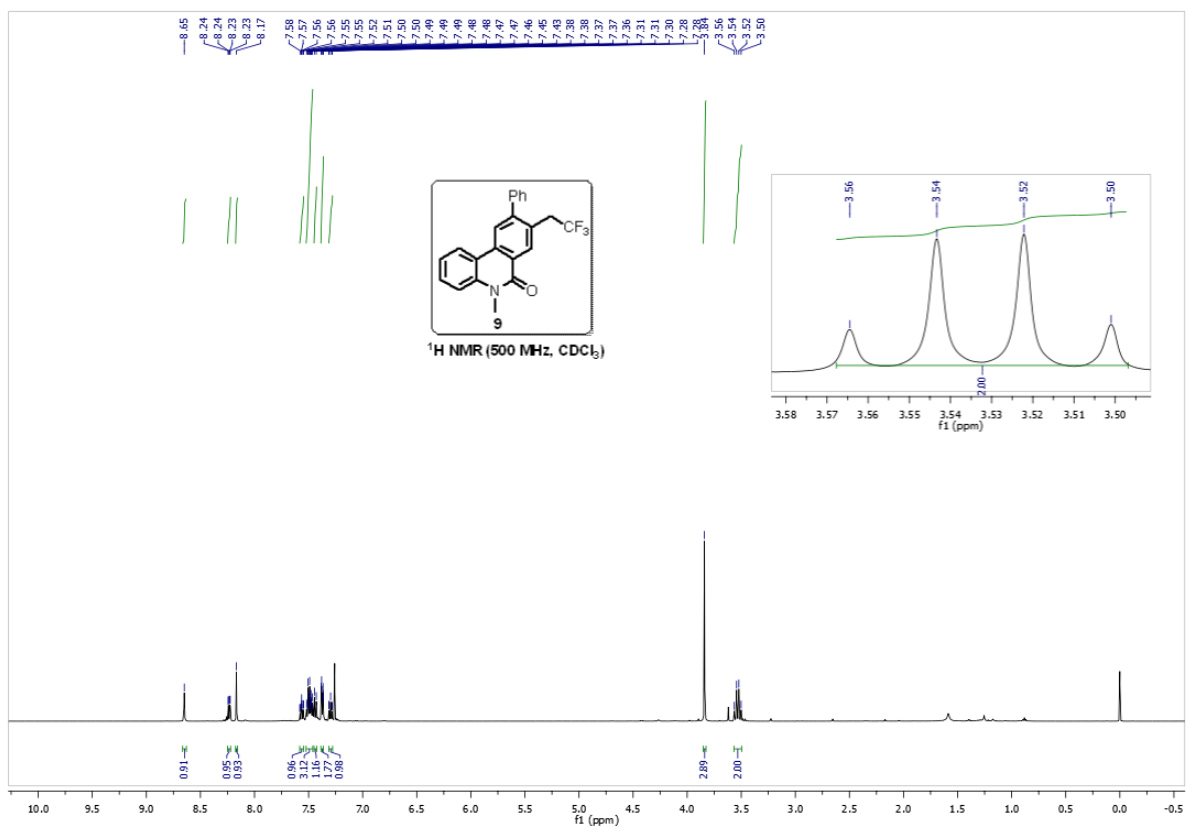

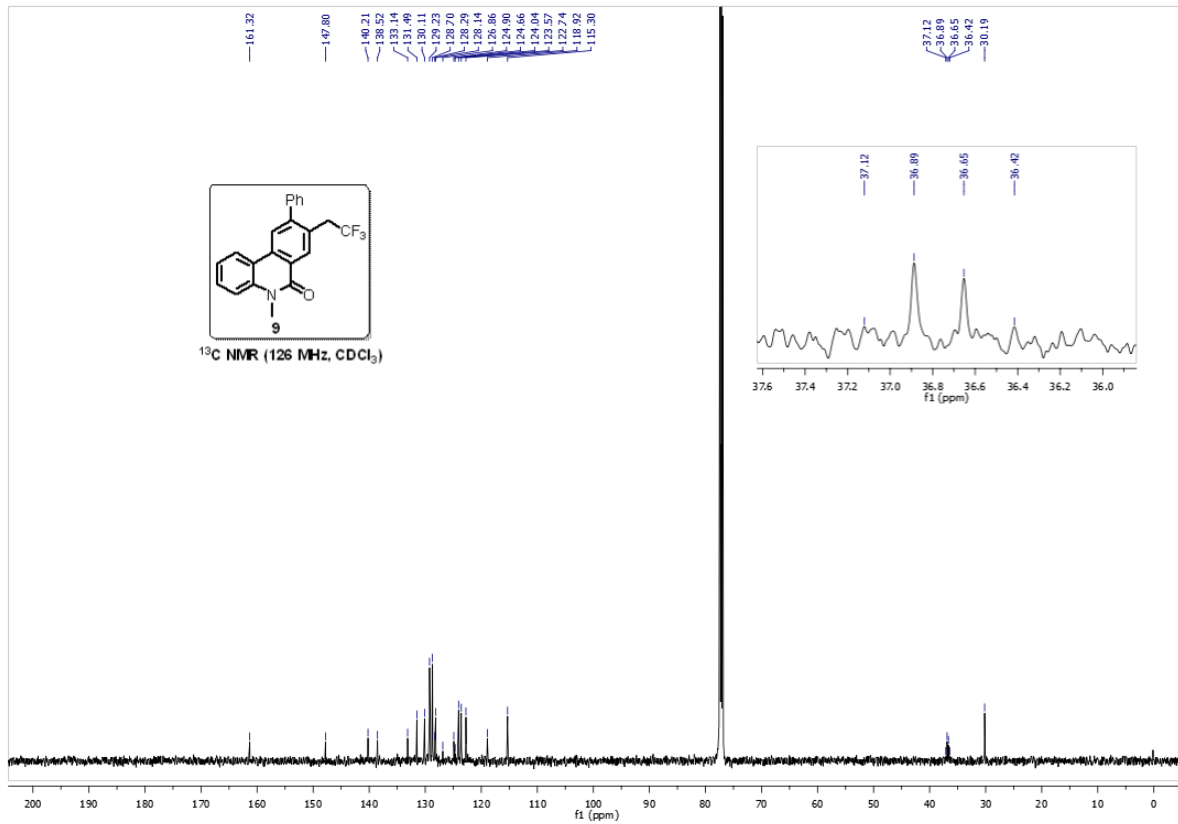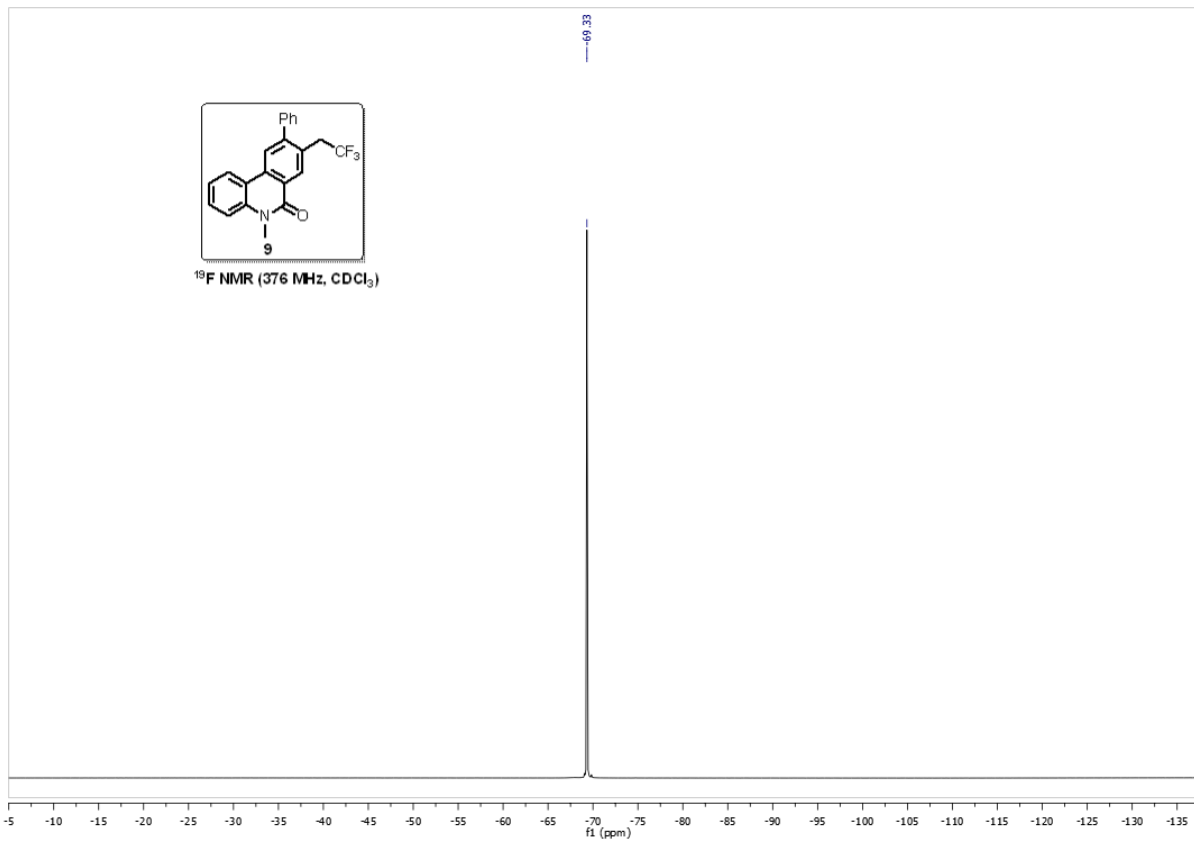

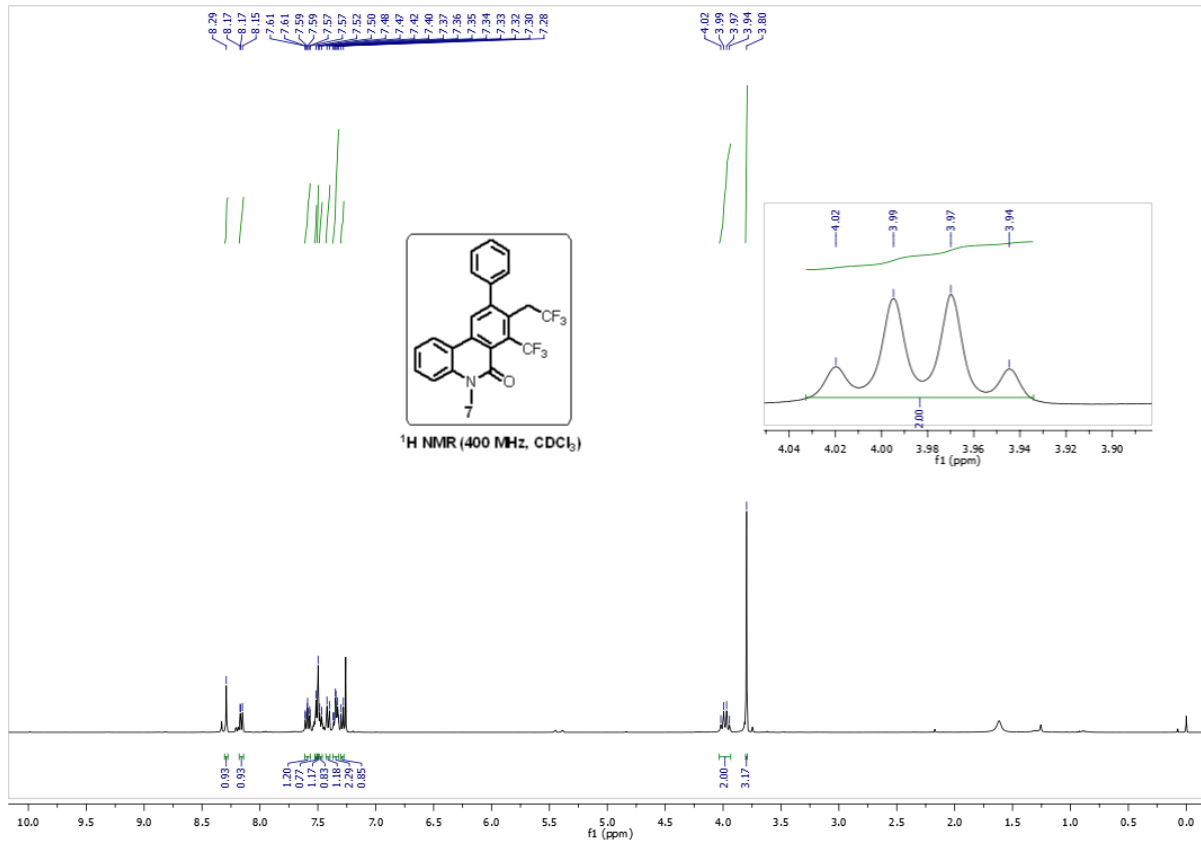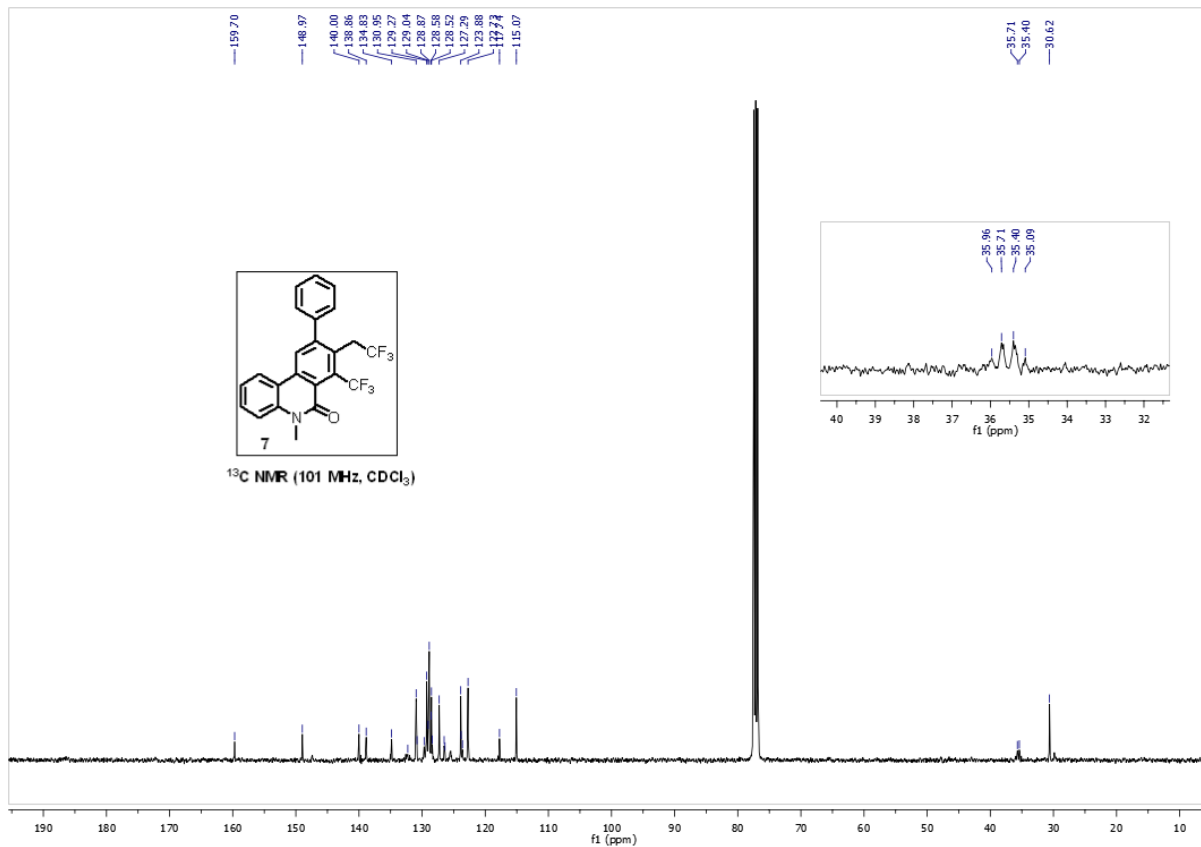

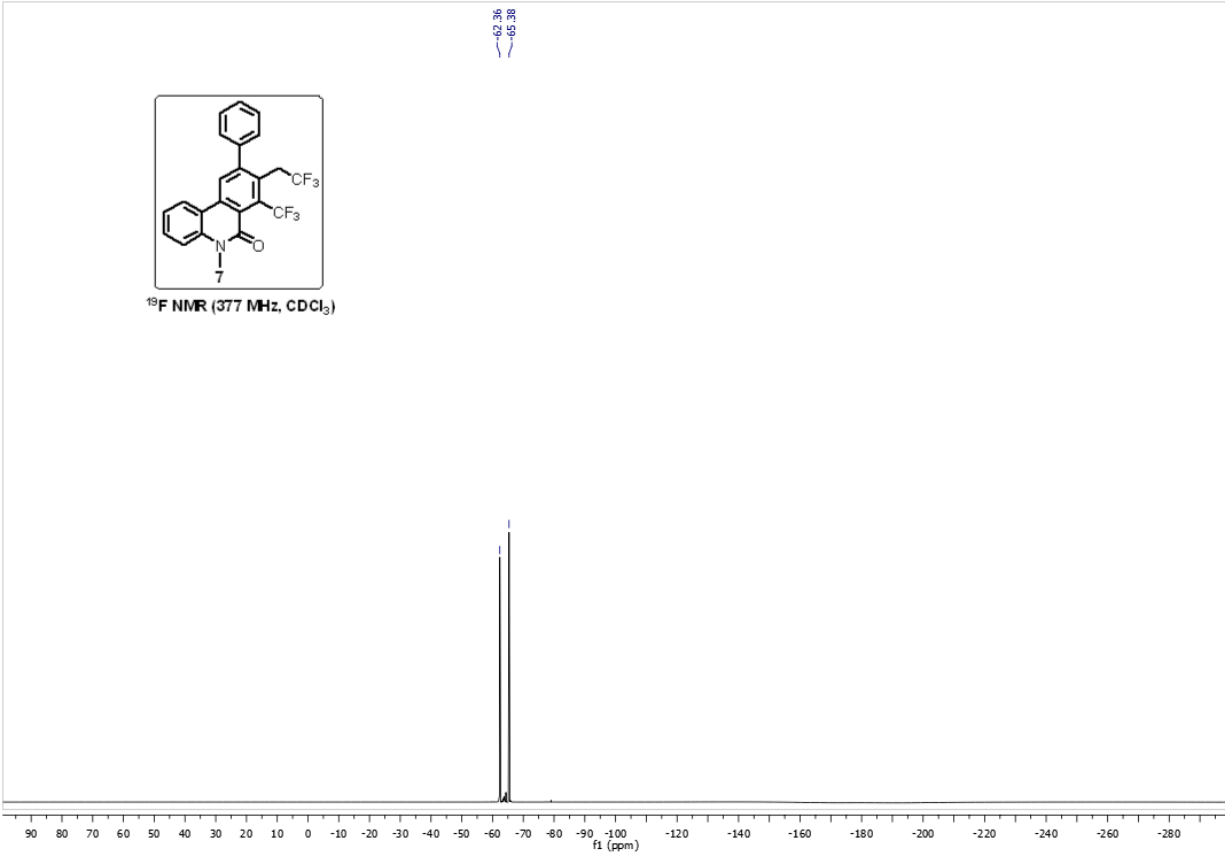

Supplement: d4cc03953j1.pdf [file d4cc03953j1.pdf]
